# Supplementary material for: Lineage tracing of genome-edited alleles reveals high fidelity axolotl limb regeneration
Source: eLife. 2017 Sep 16;6:e25726. doi: 10.7554/eLife.25726 (PMC5621835; doi:10.7554/eLife.25726)
Supplement: Figure 1—figure supplement 2—source data 1. [file elife-25726-fig1-figsupp2-data1.xlsx]

## Sheet: allele comparisons between anim
	alleles assessed in 4 animals	alleles assesed in 3 animals	alleles assessed in 2 animals
unique alleles	54	85	18
alleles present in 2 animals	41	25	6
alleles present in 3 animals	11	21
alleles present in 4 animals	20
	126	131	24

## Sheet: allele comparisons binned 
	number of times shared		4	3	2	1
allele frequency bin
18+			4	1	1	0
16 to 18			5	1	1	0
14to16			19	2	1	0
12to14			17	5	14	8
10to12			12	4	10	16
8to10			16	3	5	8
6to8			20	5	7	0
4to6			8	5	12	9
2to4			0	3	17	1
