# Supplementary material for: Lineage tracing of genome-edited alleles reveals high fidelity axolotl limb regeneration
Source: eLife. 2017 Sep 16;6:e25726. doi: 10.7554/eLife.25726 (PMC5621835; doi:10.7554/eLife.25726)
Supplement: Figure 1—figure supplement 3—source data 1. [file elife-25726-fig1-figsupp3-data1.xlsx]

## Sheet: Sheet1
allele
	animal #	100 PG	1	2	3	4	5	1000pg	1	2	3	4	5		number of occurences
METH
target: GGAGAAGTTCCTGAAGGAGGCGG			9975	13589	8868	9554	18287		7674	10682	13309	9911	13222
70to81: GGAGAAGTTCCTGAGCATCCTCAAAC													115		1
72to78: GAGAAGTTCCTGAAACCGCATCCT			5												1
72to79: AAGTTCCTGAACCGCATCCTCAAA			22												1
72to75: GAAGTTCCTGAAGGCGGACCGCAT			12												1		5
69to79GAGAAGTCC: GGAGAAGTTCCTGGAGAAGTCCACCGCATCCTCAA					42										1
TOTAL ALLELES			3		1								1	5	1	5 of 5 unique
spf		100PG						1000pg
target: TCATGGTGATGGAGACAGTGG			4145	5462	3009	6275	8677		528	4212	4529	3017	3401
28to55: AGAAACCCGATTTCTCCATCACCATGAG									7		117				2
27to53: AGAAACCCGATTTTCTCCATCACCATGA									8		34				2
45to59 : AGGTCTACAGATCCATCACCATGA									35		20				2	OF 7
53to56: TCCAGTGCCACTCCATCACCATG												375			1
48to56: CAGATCCAGTGCCATCACCATG									37			17			2
55CGACAGTC: GCCACTGTCCGACAGTCTCCATCACC												64			1
36to56: TTTCCCAGGTCTCCATCACCATGA													145		1
52to81: ATCCAGTGCCACCATCCTCAGCTT													89		1
53to83C: CCAGTGCCACCTCCTCAGCTTCC													5		1
54to70C: AGTGCCACTCGCCTTTCTCACCAT				12											1
50to67: CCAGTGCCACTGAGGGCCTTTCT				18											1
TOTAL ALLELES			1	2	1				4		3	3	3	17		7 of 11 unique
TYR		100PG
target: GGGAGATCCAGAAGGTGACCG			690	7321	2184	8063	5301		575			5474	3814				3
46to68: CTGCTCTGGGAGCGACCAGGACTTC						19									1
38to63: CTGCTGCTCCGGCGACCAGGACTT					5										1
60to66: ATCCAGAAGGCGACCAGGACTTCA						25	194								2	OF 3
TOTAL ALLELES					1	2	1							4		2 of 3 unique
Cherry	100pg		1	2	3	4	5	1000pg	1	2	3	4	5
target: CCTACGAGGGCACCCAGACCG			5675	7514	2374	7728	5368			7223	3180	10248	8131
31to89: CACGAGTTCGCAGACCAAGGGTGG
32to91: ACGAGTTCGAGACCAAGGGTGGCC				92											1
32to92: GTTCGAGACCAAGGGTGGCCCCCT				75											1
43to82: GGCGAGGGCCGCAAACCGCCAAGC											10				1
46to66: GAGGGCGAGGGCACCCAGACCGCC										16	10	18			3
51to67: GAGGGCGAGGGCACCCAGACCGCC										13	7	15			3
52to56: AGGGCGAGGGCACCCAGACCGCCA										8	17	11			3
52to60: GAGGGCGAGGGCGAGGGCACCCAG										12	15				2
56to78: CGAGGGCCGCCAAGCTGAAGGTG			78			57									2
56to78Insert: CGAGGGCCGCCAAAGCTGAAGGTG						12									1
61to74: GGCCGCCCCTACCGCCAAGCTGA												13			1
TOTAL ALLELES			1	2		3				4	5	4		19
mdk	100pg		1	2	3	4	5	1000pg	1	2	3	4	5			5 of 10 unique
target: CCATCCAAGTGACCAAGCCCTGC			5835	7206	5995	8153	12136		5727	8277	4953	9215	11217
58to93: CAAAATGTGATGTGACCAAGCCCT			13								86				2
70to81: CAAAATGTGATGTGACCAAGCCCT			9								108				2
70to81T: CAAAATGTGATTGTGACCAAGCCCT											7
72to85: AAATGTGATGACCAAGCCCTGCGC			9		18										2
76to78A: TGATGACACCAAAAGTGACCAAGC											6				1
76to79: GATGACACCAAGTGACCAAGCC												9			1		10
76to87: TGTGATGACACCAAGCCCTGCGCCCC										24					1
76to97: GTGATGACACCACCCCAAGAGCAA											12				1
77to82: TGATGACACCATGACCAAGCCCTG												5			1	5
79to81C: TGACACCATCCCTGACCAAGCCCT			13												1
TOTAL ALLELES			4		1					1	5	2		13
													TOTAL ALLELES	58
														1.18		7 of 10 unique
																	9
																	27
