# Supplementary material for: Lineage tracing of genome-edited alleles reveals high fidelity axolotl limb regeneration
Source: eLife. 2017 Sep 16;6:e25726. doi: 10.7554/eLife.25726 (PMC5621835; doi:10.7554/eLife.25726)
Supplement: Figure 1—source data 1. [file elife-25726-fig1-data1.xlsx]

## Sheet: all egfp raw
EGFP		Animal 1 1	Animal 1 2	Animal 1 3	Animal 2 1	Animal 2 2	Animal 2 3	Animal 3 1	Animal 3 2	Animal 3 3	Animal 4 1	Animal 4 2	Animal 4 3
17to55GAACGTGGACTC: ATGCCACGAACGTGGACTCCAAGCTGC											130
18to48: GATGCCACCCCACCGGCAAGCTGCCCG
18to54CCAC: CGATGCCACCCCACGCAAGCTGCCCGT									378
30to63: CTACGGCAAGCTGCCGTGCCCTGGCCC		23116	8344	9930	8010	388	3582	614	3600	182	55950	31164	76504
34to54: GCAAGCTGACCGCAAGCTGCCCGTGCC		42		6	172	248	1838
34to65: CTACGGCAAGCTGACCGTGCCCTGGCC		20		2	24		4		4		26	14	96
39to60: GCTGACCCTGAAGCTGCCCGTGCCCTG		228							2
43to55GGTTCAT: AAGTTCAGGTTCATCAAGCTGCCCGTG								82
43to57: AGCTGACCCTGAAGTTCAAGCTGCCCG		9250	334	3300	1172	56	320	306	306	88	29264	23122	52256
43to58: ACCCTGAAGTTCAGCTGCCCGTGCCCT		26	4	10				938	2940	2
43to58G: GACCCTGAAGTTCAGGCTGCCCGTGCC													14
45to56: CTGAAGTTCATCAAGCTGCCCGTGCCC
45to80: CCCTGAAGTTCATCCTCGTGACCACCC
46to73: CTGAAGTTCATCTGGCCCACCCTCGTG					94
48to56: AAGTTCATCTGCAAGCTGCCCGTGCCC		35426	12700	8872	11722	162	9152	2192	12632	5350	254	29284	7588
48to60: GAAGTTCATCTGCTGCCCGTGCCCTGG		102			2788		2
48to61: GAAGTTCATCTGCGCCCGTGCCCTGGC		18		2				14	128	12
48to63: GAAGTTCATCTGCCCGTGCCCTGGCCC		8414	8122	4856	60	18	80	1788	4198	3062	292	2208	1380
48to64: GAAGTTCATCTGCCGTGCCCTGGCCCA		1702	278	4
48to69: GAAGTTCATCTGCCCTGGCCCACCCTG
48to75: GAAGTTCATCTGCCCACCCTCGTGACC		688	232	2						2
49to66TCATTAAGC: TTCATCTGCATCATTAAGCTGCCCGTG		566	1140	4
50to65: AGTTCATCTGCACGTGCCCTGGCCCAC		8016	6040	5562	30	8	26	118	36	12
51to52TA: ATCTGCACCTACGGCAAGCTGCCCGTG		48	6	14	548	84	3056
51to54: TTCATCTGCACCGCAAGCTGCCCGTGC
51to54GC: ATCTGCACCGCGCAAGCTGCCCGTGCC					78	24	66
51to54GGATCGTTTC: CATCTGCACCAGGATCGTTTCGCAAGC					594		2
51to64: AAGTTCATCTGCACCCGTGCCCTGGCC		1046	110	122	138	36	160	3358	79902	7944	66	166	130
51to65: AAGTTCATCTGCACCGTGCCCTGGCCC		6838	3846	1734	12		14
51to71: GAAGTTCATCTGCACCTGGCCCACCCT		4	1094	2			4
52to54T: CATCTGCACCATGCAAGCTGCCCGTGC					10	18	20
52to57: AGTTCATCTGCACCAAGCTGCCCGTGC		115570	44914	56750	22406	1766	18094	756	2344	158
52to58: GTTCATCTGCACCAGCTGCCCGTGCCC
52to71TCTGCCCGTGCC: TGCACCATCTGCCCGTGCCTGGCCCAC		34	4	2				490	1716	578
53AAC: ATCTGCACCACCAACGGCAAGCTGCCC
53CG: TCTGCACCACCCGGGCAAGCTGCCCGT		572	40	92	29466	144	30022
53to54: CATCTGCACCACGCAAGCTGCCCGTGC		3042	424	558	94748	49598	136066
53to54ACT: CATCTGCACCACCACTGCAAGCTGCCC		20									356	2
53to54ATCT: ATCTGCACCACCATCTGCAAGCTGCCC		162	2	2584
53to54T: ATCTGCACCACTGCAAGCTGCCCGTGC		718	2	4526
53to55AAGTT: CTGCACCACCAAGTTCAAGCTGCCCGT		4			2276		2
53to55ATCTGAACAGAGATAGA: CACCACCATCTGAACAGAGATAGACAA								194	162
53to55CTCGTGCAGAAGTT: TGCACCACCCTCGTGCAGAAGTTCAAG
53to55CTGCACCACCCTGAAGTT: CACCACCCTGCACCACCCTGAAGTTCA									230
53to55TGCAC: ATCTGCACCACCTGCACCAAGCTGCCC		3354	6138	2946	26		22
53to56: TCATCTGCACCACAAGCTGCCCGTGCC		3716	5064	24	8	510	1810
53to57AGTTC: CTGCACCACCAGTTCAGCTGCCCGTGC
53to66CTCGTGACCAAGC: TGCACCACCCTCGTGACCAAGCTGCCC									1012
54AC: CTGCACCACCGACGCAAGCTGCCCGTG		36	6242	1900	8	10	14
54CA: TCTGCACCACCGCAGCAAGCTGCCCGT
54CTCGAGCTCGA: ACCACCGCTCGAGCTCGAGCAAGCTGC
54T: TCTGCACCACCGTGCAAGCTGCCCGTG		556	144	136	448	456	256	340	1612	1238	8380	106238	55316
54TG: TCTGCACCACCGTGGCAAGCTGCCCGT
54TGCACGACCCTGAAGTTCATCT: ACCGTGCACGACCCTGAAGTTCATCTG		230		346
54to54ATGCCACCTACG: CACCGATGCCACCTACGGCAAGCTGCC		4	4		1530		2
54to54CTGCCCGTG: GCACCACCGCTGCCCGTGCAAGCTGCC		1268	6	2			8
54to54T: ATCTGCACCACCTGCAAGCTGCCCGTG		42	18	36	1736	2	46
54to54TA: CTGCACCACCGTACAAGCTGCCCGTGC		952	88	96	108	22	166	1924	62036	8352	44	218	144
54to54TGCACCACGTTCAT: GCACCACCGTGCACCACGTTCATCAAG		1558	166	210	216	44	326	14018	91422	23378	102	214	230
54to54TGCCCTAGCA: CACCGTGCCCTAGCACAAGCTGCCCGT		158
54to55C: ATCTGCACCACCCCAAGCTGCCCGTGC		10							724
54to56: CATCTGCACCACCAAGCTGCCCGTGCC		386	12	12	1768		22	418	2022	6
54to63TGCCCTGTGCCCTGGCCCA: ACCGTGCCCTGTGCCCTGGCCCACCGT		56	12	16	22	2	8	2576	3094	560	4	6
54to64: ATCTGCACCACCCGTGCCCTGGCCCAC								622	534
54to66: TCATCTGCACCACCATGCCCTGGCCCA
54to68: TCATCTGCACCACCACCCTGGCCCACC
54to70: ATCTGCACCACCCTGGCCCACCCTCGT					1780		2				108		2
54to71: ATCTGCACCACCTGGCCCACCCTCGTG											126		2
54to80: ATCTGCACCACCCTCGTGACCACCCTG								160	2				6
54TT: ATCTGCACCACCGTTGCAAGCTGCCCG		1366	4366	20	4	4	18
55G: TGCACCACCGGGCAAGCTGCCCGTGCC		940	4		1900	186	6		416			66	28
55to55: TCTGCACCACCGCAAGCTGCCCGTGCC		2328	600	5780	736	20	128	6652	8584	15074	50	110
55to57: CATCTGCACCACCGAGCTGCCCGTGCC		1792	4188	14
55to57TGC: CTGCACCACCGTGCAGCTGCCCGTGCC					522
55to58T: TCTGCACCACCGTGCTGCCCGTGCCCT								562	2	2
55to59: TCTGCACCACCGCTGCCCGTGCCCTGG		310	32	38	4580	958	15928	554	314	12
55to60: TCATCTGCACCACCGTGCCCGTGCCCT		7212	11224	268	26	6	48
55to60TGCC: CTGCACCACCGTGCCCTGCCCGTGCCC		18	14	10	5828	178	18	432	26	1852	6	26	18
55to62: CATCTGCACCACCGCCCGTGCCCTGGC		546		2
55to66: GTTCATCTGCACCACCGTGCCCTGGCC		3232	482	1602	4706	246	4474	864	9836	20	518	34	44
55to74: TCTGCACCACCGCCCACCCTCGTGACC								304	2
56GCCCCGCGCCACGC: CCGGCGCCCCGCGCCACGCAAGCTGCC									284
56to67: CATCTGCACCACCGGGCCCTGGCCCAC				6				214	6
56to69GT: ATCTGCACCACCGGGTCCTGGCCCACC
57to60: ATCTGCACCACCGGCTGCCCGTGCCCT								106	4	516
wildtype: ATCTGCACCACCGGCAAGCTGCCCGTG		72524	30428	66722	38940	3878	55978	6924	10188	17238	7308	71828	23946
sum		318266	156868	179120	239240	59072	281790	47520	300698	85638	102984	264700	217704
RPM coefficient		3.14203	6.37479	5.58285	4.1799	16.9285	3.54874	21.0438	3.3256	11.6771	9.71025	3.77786	4.59339

## Sheet: all EGFP normalized
	Animal 1 1	Animal 1 2	Animal 1 3	Animal 2 1	Animal 2 2	Animal 2 3	Animal 3 1	Animal 3 2	Animal 3 3	Animal 4 1	Animal 4 2	Animal 4 3
17to55GAACGTGGACTC: ATGCCACGAACGTGGACTCCAAGCTGC										1262.26
18to48: GATGCCACCCCACCGGCAAGCTGCCCG
18to54CCAC: CGATGCCACCCCACGCAAGCTGCCCGT							0	1250.7	0
30to63: CTACGGCAAGCTGCCGTGCCCTGGCCC	72630.6	53189.2	55437.1	33481	6567.81	12711.6	12833.9	11911.4	2114.56	543257	117728	351410
34to54: GCAAGCTGACCGCAAGCTGCCCGTGCC	131.964	0	33.4967	718.943	4197.98	6522.59
34to65: CTACGGCAAGCTGACCGTGCCCTGGCC	62.8401	0	11.1656	100.318	0	14.195	0	13.2349	0	252.452	52.8877	440.962
39to60: GCTGACCCTGAAGCTGCCCGTGCCCTG	716.377	0	0				0	6.61745	0
43to55GGTTCAT: AAGTTCAGGTTCATCAAGCTGCCCGTG							1713.98	0	0
43to57: AGCTGACCCTGAAGTTCAAGCTGCCCG	29063.6	2129.1	18423.2	4898.85	947.932	1135.6	6396.05	1012.47	1022.42	284144	87347.7	240030
43to58: ACCCTGAAGTTCAGCTGCCCGTGCCCT	81.6922	25.4982	55.8279				19606.2	9727.66	23.2369
43to58G: GACCCTGAAGTTCAGGCTGCCCGTGCC												64.3069
45to56: CTGAAGTTCATCAAGCTGCCCGTGCCC
45to80: CCCTGAAGTTCATCCTCGTGACCACCC
46to73: CTGAAGTTCATCTGGCCCACCCTCGTG				392.911	0	0
48to56: AAGTTCATCTGCAAGCTGCCCGTGCCC	111309	80956.7	49530.5	48996.8	2742.23	32478.1	45817.5	41795.8	62158.7	2466.26	110626	34854.3
48to60: GAAGTTCATCTGCTGCCCGTGCCCTGG	320.485	0	0	11653.6	0	7.09748	0	0	0
48to61: GAAGTTCATCTGCGCCCGTGCCCTGGC	56.5561	0	11.1656	0	33.8547	0	292.63	423.517	139.421	19.4194	7.55538
48to63: GAAGTTCATCTGCCCGTGCCCTGGCCC	26436.8	51774	27110	250.794	304.692	283.899	37373	13890	35575.7	2835.23	8341.14	6338.82
48to64: GAAGTTCATCTGCCGTGCCCTGGCCCA	5347.69	1772.12	22.3311
48to69: GAAGTTCATCTGCCCTGGCCCACCCTG
48to75: GAAGTTCATCTGCCCACCCTCGTGACC	2161.7	1478.89	11.1656				0	0	23.2369
49to66TCATTAAGC: TTCATCTGCATCATTAAGCTGCCCGTG	1778.38	7266.98	22.3311
50to65: AGTTCATCTGCACGTGCCCTGGCCCAC	25186.3	38502.2	31051.5	125.397	135.419	92.2673	2466.45	119.114	139.421
51to52TA: ATCTGCACCTACGGCAAGCTGCCCGTG	150.816	38.2473	78.159	2290.59	1421.9	10845
51to54: TTCATCTGCACCGCAAGCTGCCCGTGC
51to54GC: ATCTGCACCGCGCAAGCTGCCCGTGCC				326.032	406.256	234.217
51to54GGATCGTTTC: CATCTGCACCAGGATCGTTTCGCAAGC				2482.86	0	7.09748
51to64: AAGTTCATCTGCACCCGTGCCCTGGCC	3286.54	701.2	681.1	576.827	609.385	567.799	70189.4	264374	92297	640.839	627.097	597.136
51to65: AAGTTCATCTGCACCGTGCCCTGGCCC	21485	24516.5	9680.55	50.1588	0	49.6824
51to71: GAAGTTCATCTGCACCTGGCCCACCCT	12.568	6973.75	11.1656	0	0	14.195
52to54T: CATCTGCACCATGCAAGCTGCCCGTGC				41.799	304.692	70.9748
52to57: AGTTCATCTGCACCAAGCTGCCCGTGC	363122	286306	316823	93654.9	29893.7	64210.9	15802	7755.66	1835.72
52to58: GTTCATCTGCACCAGCTGCCCGTGCCC
52to71TCTGCCCGTGCC: TGCACCATCTGCCCGTGCCTGGCCCAC	106.828	25.4982	11.1656				10242	5677.78	6715.46	19.4194	30.2215
53AAC: ATCTGCACCACCAACGGCAAGCTGCCC
53CG: TCTGCACCACCCGGGCAAGCTGCCCGT	1797.23	254.982	513.616	123165	2437.54	106540
53to54: CATCTGCACCACGCAAGCTGCCCGTGC	9557.98	2702.81	3115.2	396037	839563	482863
53to54ACT: CATCTGCACCACCACTGCAAGCTGCCC	62.8401	0	0							3456.65	7.55538
53to54ATCT: ATCTGCACCACCATCTGCAAGCTGCCC	509.005	12.7491	14425.9
53to54T: ATCTGCACCACTGCAAGCTGCCCGTGC	2255.96	12.7491	25267.7
53to55AAGTT: CTGCACCACCAAGTTCAAGCTGCCCGT	12.568	0	0	9513.46	0	7.09748
53to55ATCTGAACAGAGATAGA: CACCACCATCTGAACAGAGATAGACAA							4055.02	536.014
53to55CTCGTGCAGAAGTT: TGCACCACCCTCGTGCAGAAGTTCAAG
53to55CTGCACCACCCTGAAGTT: CACCACCCTGCACCACCCTGAAGTTCA							0	761.007
53to55TGCAC: ATCTGCACCACCTGCACCAAGCTGCCC	10538.3	39126.9	16446.9	108.677	0	78.0723
53to56: TCATCTGCACCACAAGCTGCCCGTGCC	11675.7	32280.7	133.987	33.4392	8632.95	6423.22
53to57AGTTC: CTGCACCACCAGTTCAGCTGCCCGTGC
53to66CTCGTGACCAAGC: TGCACCACCCTCGTGACCAAGCTGCCC							0	3348.43
54AC: CTGCACCACCGACGCAAGCTGCCCGTG	113.112	39789.9	10607.3	33.4392	169.274	49.6824
54CA: TCTGCACCACCGCAGCAAGCTGCCCGT
54CTCGAGCTCGA: ACCACCGCTCGAGCTCGAGCAAGCTGC
54T: TCTGCACCACCGTGCAAGCTGCCCGTG	1746.96	917.934	759.259	1872.6	7718.87	908.478	7106.73	5333.67	14383.6	81367.1	401334	254086
54TG: TCTGCACCACCGTGGCAAGCTGCCCGT	0	0	0
54TGCACGACCCTGAAGTTCATCT: ACCGTGCACGACCCTGAAGTTCATCTG	722.661	0	1931.64
54to54ATGCCACCTACG: CACCGATGCCACCTACGGCAAGCTGCC	12.568	25.4982	0	6395.25	0	7.09748
54to54CTGCCCGTG: GCACCACCGCTGCCCGTGCAAGCTGCC	3984.06	38.2473	11.1656	0	0	28.3899
54to54T: ATCTGCACCACCTGCAAGCTGCCCGTG	131.964	114.742	200.98	7256.31	33.8547	163.242
54to54TA: CTGCACCACCGTACAAGCTGCCCGTGC	2991.19	560.96	535.948	451.43	372.402	589.091	40215.7	205260	97037.3	427.226	823.536	661.443
54to54TGCACCACGTTCAT: GCACCACCGTGCACCACGTTCATCAAG	4895.25	1058.17	1172.39	902.859	744.803	1156.89	293006	302490	271616	990.387	808.426	1056.47
54to54TGCCCTAGCA: CACCGTGCCCTAGCACAAGCTGCCCGT	496.437	0	0
54to55C: ATCTGCACCACCCCAAGCTGCCCGTGC	31.4201	0	0				0	2395.52	0
54to56: CATCTGCACCACCAAGCTGCCCGTGCC	1212.81	76.4945	66.9934	7390.07	0	78.0723	8737.09	6690.25	69.7107
54to63TGCCCTGTGCCCTGGCCCA: ACCGTGCCCTGTGCCCTGGCCCACCGT	175.952	76.4945	89.3246	91.9579	33.8547	28.3899	53843.9	10237.2	6506.33	38.8387	22.6661
54to64: ATCTGCACCACCCGTGCCCTGGCCCAC							13001.1	1766.86	0
54to66: TCATCTGCACCACCATGCCCTGGCCCA
54to68: TCATCTGCACCACCACCCTGGCCCACC
54to70: ATCTGCACCACCCTGGCCCACCCTCGT				7440.23	0	7.09748				1048.65	0	9.1867
54to71: ATCTGCACCACCTGGCCCACCCTCGTG										1223.42	0	9.1867
54to80: ATCTGCACCACCCTCGTGACCACCCTG	0	0	0				3344.34	6.61745	0			27.5601
54TT: ATCTGCACCACCGTTGCAAGCTGCCCG	4291.98	27831.3	111.656	16.7196	67.7094	63.8774
55G: TGCACCACCGGGCAAGCTGCCCGTGCC	2953.49	25.4982	0	7941.82	3148.49	21.2925	0	1376.43	0	0	249.328	128.614
55to55: TCTGCACCACCGCAAGCTGCCCGTGCC	7314.59	3824.73	32268.5	3076.41	338.547	454.239	139041	28402.1	175137	485.484	415.546
55to57: CATCTGCACCACCGAGCTGCCCGTGCC	5630.47	26696.6	78.159
55to57TGC: CTGCACCACCGTGCAGCTGCCCGTGCC				2181.91	0	0
55to58T: TCTGCACCACCGTGCTGCCCGTGCCCT							11747	6.61745	23.2369
55to59: TCTGCACCACCGCTGCCCGTGCCCTGG	974.022	203.985	212.146	19144	16216.4	56524.4	11579.8	1038.94	139.421
55to60: TCATCTGCACCACCGTGCCCGTGCCCT	22660.1	71547.9	1496.19	108.677	101.564	170.34
55to60TGCC: CTGCACCACCGTGCCCTGCCCGTGCCC	56.5561	89.2436	55.8279	24360.5	3013.07	63.8774	9029.72	86.0269	21517.4	58.2581	98.2199	82.6803
55to62: CATCTGCACCACCGCCCGTGCCCTGGC	1715.54	0	11.1656				0	6.61745	23.2369
55to66: GTTCATCTGCACCACCGTGCCCTGGCC	10155	3072.53	8943.62	19670.6	4164.13	15877.1	18059.4	32544.6	232.369	5029.61	128.441	202.107
55to74: TCTGCACCACCGCCCACCCTCGTGACC							6354.25	6.61745	0
56GCCCCGCGCCACGC: CCGGCGCCCCGCGCCACGCAAGCTGCC							0	939.678	0
56to67: CATCTGCACCACCGGGCCCTGGCCCAC	0	0	33.4967				4473.06	19.8524	0
56to69GT: ATCTGCACCACCGGGTCCTGGCCCACC
57to60: ATCTGCACCACCGGCTGCCCGTGCCCT							2215.63	13.2349	5995.12	0	7.55538
wildtype: ATCTGCACCACCGGCAAGCTGCCCGTG	227871	193965	372495	162765	65644.3	198651	144726	33709.3	200279	70958.3	271344	109992

## Sheet: all EGFP log
EGFP	Animal 1 1	Animal 1 2	Animal 1 3	Animal 2 1	Animal 2 2	Animal 2 3	Animal 3 1	Animal 3 2	Animal 3 3	Animal 4 1	Animal 4 2	Animal 4 3
17to55GAACGTGGACTC: ATGCCACGAACGTGGACTCCAAGCTGC										10.3018
18to48: GATGCCACCCCACCGGCAAGCTGCCCG
18to54CCAC: CGATGCCACCCCACGCAAGCTGCCCGT							0	10.2897	0			3.19955
30to63: CTACGGCAAGCTGCCGTGCCCTGGCCC	16.1483	15.6988	15.7586	15.0311	12.6812	13.6339	13.6478	13.5402	11.0468	19.0513	16.8451	18.4228
34to54: GCAAGCTGACCGCAAGCTGCCCGTGCC	7.044		5.06595	9.48973	12.0355	12.6712
34to65: CTACGGCAAGCTGACCGTGCCCTGGCC	5.97361		3.48099	6.64843		3.82731	0	3.83136	0	7.97986	5.72486	8.78451
39to60: GCTGACCCTGAAGCTGCCCGTGCCCTG	9.48458						0	2.92931	0
43to55GGTTCAT: AAGTTCAGGTTCATCAAGCTGCCCGTG							10.744	0	0
43to57: AGCTGACCCTGAAGTTCAAGCTGCCCG	14.8269	11.056	14.1692	12.2582	9.88864	10.1492	12.6432	9.98509	9.99919	18.1163	16.4145	17.8729
43to58: ACCCTGAAGTTCAGCTGCCCGTGCCCT	6.35213	4.67232	5.80291				14.2591	13.248	4.59913
43to58G: GACCCTGAAGTTCAGGCTGCCCGTGCC												6.0069
45to56: CTGAAGTTCATCAAGCTGCCCGTGCCC
45to80: CCCTGAAGTTCATCCTCGTGACCACCC
46to73: CTGAAGTTCATCTGGCCCACCCTCGTG				8.61806
48to56: AAGTTCATCTGCAAGCTGCCCGTGCCC	16.7642	16.3049	15.596	15.5804	11.4211	14.9872	15.4836	15.3511	15.9237	11.2681	16.7553	15.0891
48to60: GAAGTTCATCTGCTGCCCGTGCCCTGG	8.32411			13.5085		2.82731	0	0	0
48to61: GAAGTTCATCTGCGCCCGTGCCCTGGC	5.82161		3.48099		5.08128		8.19786	8.72968	7.13362	4.27942	2.9175
48to63: GAAGTTCATCTGCCCGTGCCCTGGCCC	14.6903	15.6599	14.7265	7.97036	8.25121	8.14924	15.1897	13.7619	15.1186	11.4692	13.026	12.63
48to64: GAAGTTCATCTGCCGTGCCCTGGCCCA	12.3847	10.7913	4.48099
48to69: GAAGTTCATCTGCCCTGGCCCACCCTG
48to75: GAAGTTCATCTGCCCACCCTCGTGACC	11.078	10.5303	3.48099				0	0	4.59913
49to66TCATTAAGC: TTCATCTGCATCATTAAGCTGCCCGTG	10.7963	12.8271	4.48099				0	0	0
50to65: AGTTCATCTGCACGTGCCCTGGCCCAC	14.6204	15.2327	14.9224	6.97036	7.08128	6.52775	11.2688	6.90826	7.13362
51to52TA: ATCTGCACCTACGGCAAGCTGCCCGTG	7.23665	5.25728	6.28834	11.1615	10.4736	13.4047
51to54: TTCATCTGCACCGCAAGCTGCCCGTGC
51to54GC: ATCTGCACCGCGCAAGCTGCCCGTGCC				8.34887	8.66625	7.8717
51to54GGATCGTTTC: CATCTGCACCAGGATCGTTTCGCAAGC				11.2778		2.82731
51to64: AAGTTCATCTGCACCCGTGCCCTGGCC	11.6824	9.45368	9.41172	9.17199	9.25121	9.14924	16.099	18.0122	16.494	9.32382	9.29254	9.22191
51to65: AAGTTCATCTGCACCGTGCCCTGGCCC	14.391	14.5815	13.2409	5.64843		5.63466
51to71: GAAGTTCATCTGCACCTGGCCCACCCT	3.65169	12.7677	3.48099			3.82731
52to54T: CATCTGCACCATGCAAGCTGCCCGTGC				5.3854	8.25121	6.14924
52to57: AGTTCATCTGCACCAAGCTGCCCGTGC	18.4701	18.1272	18.2733	16.5151	14.8676	15.9705	13.9479	12.9212	10.8429
52to58: GTTCATCTGCACCAGCTGCCCGTGCCC
52to71TCTGCCCGTGCC: TGCACCATCTGCCCGTGCCTGGCCCAC	6.73915	4.67232	3.48099				13.3224	12.4714	12.7135	4.27942	4.9175
53AAC: ATCTGCACCACCAACGGCAAGCTGCCC
53CG: TCTGCACCACCCGGGCAAGCTGCCCGT	10.8116	7.99425	9.00455	16.9102	11.2512	16.701
53to54: CATCTGCACCACGCAAGCTGCCCGTGC	13.2225	11.4002	11.6051	18.5953	19.6793	18.8813
53to54ACT: CATCTGCACCACCACTGCAAGCTGCCC	5.97361									11.7552	2.9175
53to54ATCT: ATCTGCACCACCATCTGCAAGCTGCCC	8.99154	3.67232	13.8164
53to54T: ATCTGCACCACTGCAAGCTGCCCGTGC	11.1395	3.67232	14.625
53to55AAGTT: CTGCACCACCAAGTTCAAGCTGCCCGT	3.65169			13.2158		2.82731
53to55ATCTGAACAGAGATAGA: CACCACCATCTGAACAGAGATAGACAA	#NUM!	#NUM!					11.9858	9.06882	0
53to55CTCGTGCAGAAGTT: TGCACCACCCTCGTGCAGAAGTTCAAG
53to55CTGCACCACCCTGAAGTT: CACCACCCTGCACCACCCTGAAGTTCA							0	9.57366	0
53to55TGCAC: ATCTGCACCACCTGCACCAAGCTGCCC	13.3634	15.2559	14.0055	6.76391		6.28674
53to56: TCATCTGCACCACAAGCTGCCCGTGCC	13.5112	14.9784	7.06595	5.06347	13.0756	12.6491
53to57AGTTC: CTGCACCACCAGTTCAGCTGCCCGTGC
53to66CTCGTGACCAAGC: TGCACCACCCTCGTGACCAAGCTGCCC							0	11.7097	0
54AC: CTGCACCACCGACGCAAGCTGCCCGTG	6.82161	15.2801	13.3728	5.06347	7.40321	5.63466
54CA: TCTGCACCACCGCAGCAAGCTGCCCGT
54CTCGAGCTCGA: ACCACCGCTCGAGCTCGAGCAAGCTGC
54T: TCTGCACCACCGTGCAAGCTGCCCGTG	10.7706	9.84225	9.56845	10.8708	12.9142	9.82731	12.7952	12.3812	13.8122	16.3122	18.6144	17.955
54TG: TCTGCACCACCGTGGCAAGCTGCCCGT		#NUM!
54TGCACGACCCTGAAGTTCATCT: ACCGTGCACGACCCTGAAGTTCATCTG	9.49718		10.9156
54to54ATGCCACCTACG: CACCGATGCCACCTACGGCAAGCTGCC	3.65169	4.67232		12.6428		2.82731
54to54CTGCCCGTG: GCACCACCGCTGCCCGTGCAAGCTGCC	11.96	5.25728	3.48099			4.82731
54to54T: ATCTGCACCACCTGCAAGCTGCCCGTG	7.044	6.84225	7.65091	12.825	5.08128	7.35087
54to54TA: CTGCACCACCGTACAAGCTGCCCGTGC	11.5465	9.13175	9.06595	8.81836	8.54072	9.20235	15.2955	17.6471	16.5663	8.73886	9.68569	9.36947
54to54TGCACCACGTTCAT: GCACCACCGTGCACCACGTTCATCAAG	12.2572	10.0474	10.1952	9.81836	9.54072	10.176	18.1606	18.2065	18.0512	9.95185	9.65897	10.045
54to54TGCCCTAGCA: CACCGTGCCCTAGCACAAGCTGCCCGT	8.95547
54to55C: ATCTGCACCACCCCAAGCTGCCCGTGC	4.97361						0	11.2267	0
54to56: CATCTGCACCACCAAGCTGCCCGTGCC	10.2441	6.25728	6.06595	12.8514		6.28674	13.0931	12.7081	6.14386
54to63TGCCCTGTGCCCTGGCCCA: ACCGTGCCCTGTGCCCTGGCCCACCGT	7.45904	6.25728	6.48099	6.5229	5.08128	4.82731	15.7165	13.3217	12.6679	5.27942	4.50247
54to64: ATCTGCACCACCCGTGCCCTGGCCCAC							13.6665	10.7878	0
54to66: TCATCTGCACCACCATGCCCTGGCCCA
54to68: TCATCTGCACCACCACCCTGGCCCACC
54to70: ATCTGCACCACCCTGGCCCACCCTCGT				12.8611		2.82731				10.0343		3.19955
54to71: ATCTGCACCACCTGGCCCACCCTCGTG										10.2567		3.19955
54to80: ATCTGCACCACCCTCGTGACCACCCTG		#NUM!	#NUM!				11.7079	2.92931	0			4.78451
54TT: ATCTGCACCACCGTTGCAAGCTGCCCG	12.0674	14.7644	6.80291	4.06347	6.08128	5.99723
55G: TGCACCACCGGGCAAGCTGCCCGTGCC	11.5282	4.67232		12.9553	11.6204	4.41227	0	10.4278	0		7.9619	7.0069
55to55: TCTGCACCACCGCAAGCTGCCCGTGCC	12.8366	11.9011	14.9778	11.587	8.40321	8.82731	17.0852	14.7938	17.4181	8.92328	8.69886
55to57: CATCTGCACCACCGAGCTGCCCGTGCC	12.459	14.7044	6.28834
55to57TGC: CTGCACCACCGTGCAGCTGCCCGTGCC				11.0914
55to58T: TCTGCACCACCGTGCTGCCCGTGCCCT							13.5201	2.92931	4.59913
55to59: TCTGCACCACCGCTGCCCGTGCCCTGG	9.92781	7.67232	7.72891	14.2246	13.9852	15.7866	13.4994	10.0223	7.13362
55to60: TCATCTGCACCACCGTGCCCGTGCCCT	14.4679	16.1266	10.5471	6.76391	6.66625	7.41227
55to60TGCC: CTGCACCACCGTGCCCTGCCCGTGCCC	5.82161	6.47968	5.80291	14.5723	11.557	5.99723	13.1406	6.44339	14.3933	5.86439	6.61794	6.36947
55to62: CATCTGCACCACCGCCCGTGCCCTGGC	10.7444		3.48099				0	2.92931	4.59913
55to66: GTTCATCTGCACCACCGTGCCCTGGCC	13.3099	11.5852	13.1266	14.2638	12.0238	13.9547	14.1405	14.9902	7.86647	12.2962	7.00497	7.65898
55to74: TCTGCACCACCGCCCACCCTCGTGACC							12.6337	2.92931	0
56GCCCCGCGCCACGC: CCGGCGCCCCGCGCCACGCAAGCTGCC							0	9.87756	0
56to67: CATCTGCACCACCGGGCCCTGGCCCAC			5.06595				12.1274	4.38214	0
56to69GT: ATCTGCACCACCGGGTCCTGGCCCACC
57to60: ATCTGCACCACCGGCTGCCCGTGCCCT							11.1142	3.83136	12.5498
wildtype: ATCTGCACCACCGGCAAGCTGCCCGTG	17.7979	17.5654	18.5069	17.3124	16.0024	17.5999	17.143	15.0409	17.6117	16.1147	18.0498	16.747

## Sheet: all Meth 1
	Meth T1 1 1	Meth T1 1 2	Meth T1 1 3	Meth T1 2 1	Meth T1 2 2	Meth T1 2 3
59to96: CAATGGCTGTCTATAAGGACCGTTCAGAGAGC	13		14
70to93TCCTGTCAGACTACTATAAGTCTG: CACATCCTGTCAGACTACTATAAGTCTGTCTA				13772	5438	30087
73to105 CTTGCTCTGCACACCCGTTCAGAGAGCATATCGGCT				1497	753	3526
73to106A: TTGCTCTGCACACCCATTCAGAGAGCATATCG						2
76to95AAGGGG: CACACCCTGTAAGGGGTATAAGGACCGTTCAG				2
84to95: CCCTGTCAGGCTACTATAAGGACCGTTCAGAG				186622	30873	92102
85to93GGG: CCTGTCAGGCTACAGGGTCTATAAGGACCGTT				53025	22840	59647
85to96: GCACACCCTGTCAGGCTACAATAAGGACCGTT				17	6	17
87to97: CACCCTGTCAGGCTACATATAAGGACCGTTCA					799	3806
90to91TATATACTATAAGGACC: ACATACCCTATATACTATAAGGACCGTTCTAT	222	9	87
90to92: CTGTCAGGCTACATACCCTTCTATAAGGACCG	64782	5165	26584	3181	749	6262
90to94TATATA: CAGGCTACATACCCTATATACTATAAGGACCG	652789	167653	481743
91to92A: TCAGGCTACATACCCCATTCTATAAGGACCGT				130864	37094	93221
91to96: TGTCAGGCTACATACCCCATAAGGACCGTTCA	19692	4985	18421
92to93ATATTT: GCTACATACCCCTATATTTTCTATAAGGACCG				1949	593	2661
92to93: GTCAGGCTACATACCCCTTCTATAAGGACCGT				2229	2254	4240
92to94: GTCAGGCTACATACCCCTCTATAAGGACCGTT	72621	8576	57542	59896	21671	54884
92to95: GTCAGGCTACATACCCCTTATAAGGACCGTTC
92to96: GTCAGGCTACATACCCCTATAAGGACCGTTCA				153311	27426	67175
92to94CTATA: GGCTACATACCCCTCTATACTATAAGGACCGT
92to95ATAAGGGG: CTACATACCCCTATAAGGGGTATAAGGACCGT						6
92to98: GTCAGGCTACATACCCCTAAGGACCGTTCAGA						2
93G: TCAGGCTACATACCCCTGGTTCTATAAGGACC				252242	33937	198456
93to94ATATACCCCTC: CATACCCCTGATATACCCCTCCTATAAGGACC				11141	2346	4262
94AAGGACCGT: CATACCCCTGTAAGGACCGTTCTATAAGGACC	550662	207532	409301
94AAGGGCCGT: CATACCCCTGTAAGGGCCGTTCTATAAGGACC	148	48	89
94AGG: GCTACATACCCCTGTAGGTCTATAAGGACCGT		4			498	38
94ATGTATAT: ACATACCCCTGTATGTATATTCTATAAGGACC	16		8	7405	193	12
94to85AAGGGG: ACATACCCCTGTAAGGGGTATAAGGACCGTTC	104		44	8174	4862	27980
94to98: GTCAGGCTACATACCCCTGTAAGGACCGTTCA	2020	17	629	55	12	26
94T: GCTACATACCCCTGTTTCTATAAGGACCGTTC				18826	8415	26962
wt: GTCAGGCTACATACCCCTGTTCTATAAGGACC	2047	193	648	4052	2067	711

## Sheet: all Meth 1 normalized
	Meth 1 1	Meth 1 2	Meth 1 3	Meth T1 2 1	Meth T1 2 2	Meth T1 2 3
59to96: CAATGGCTGTCTATAAGGACCGTTCAGAGAGC	13.0639	0	14.0688
70to93TCCTGTCAGACTACTATAAGTCTG: CACATCCTGTCAGACTACTATAAGTCTGTCTA	0	0	0	13910.5	26811.2	44501.8
73to105 CTTGCTCTGCACACCCGTTCAGAGAGCATATCGGCT	0	0	0	1512.06	3712.54	5215.32
73to106A: TTGCTCTGCACACCCATTCAGAGAGCATATCG	0	0	0	0	0	2.95821
76to95AAGGGG: CACACCCTGTAAGGGGTATAAGGACCGTTCAG	0	0	0	2.02012	0	0
84to95: CCCTGTCAGGCTACTATAAGGACCGTTCAGAG	0	0	0	188499	152214	136228
85to93GGG: CCTGTCAGGCTACAGGGTCTATAAGGACCGTT	0	0	0	53558.4	112609	88224.1
85to96: GCACACCCTGTCAGGCTACAATAAGGACCGTT	0	0	0	17.171	29.582	25.1448
87to97: CACCCTGTCAGGCTACATATAAGGACCGTTCA	0	0	0	0	3939.34	5629.47
90to91TATATACTATAAGGACC: ACATACCCTATATACTATAAGGACCGTTCTAT	223.091	9.04423	87.4275	0	0	0
90to92: CTGTCAGGCTACATACCCTTCTATAAGGACCG	65100.3	5190.38	26714.6	3213	3692.82	9262.15
90to94TATATA: CAGGCTACATACCCTATATACTATAAGGACCG	655997	168477	484110	0	0	0
91to92A: TCAGGCTACATACCCCATTCTATAAGGACCGT	0	0	0	132180	182886	137884
91to96: TGTCAGGCTACATACCCCATAAGGACCGTTCA	19788.8	5009.5	18511.5	0	0	0
92to93ATATTT: GCTACATACCCCTATATTTTCTATAAGGACCG	0	0	0	1968.61	2923.69	3935.9
92to93: GTCAGGCTACATACCCCTTCTATAAGGACCGT	0	0	0	2251.42	11113	6271.4
92to94: GTCAGGCTACATACCCCTCTATAAGGACCGTT	72977.9	8618.14	57824.8	60498.6	106845	81179.1
92to95: GTCAGGCTACATACCCCTTATAAGGACCGTTC	0	0	0	0	0	0
92to96: GTCAGGCTACATACCCCTATAAGGACCGTTCA	0	0	0	154853	135219	99358.8
92to94CTATA: GGCTACATACCCCTCTATACTATAAGGACCGT	0	0	0	0	0	0
92to95ATAAGGGG: CTACATACCCCTATAAGGGGTATAAGGACCGT	0	0	0	0	0	8.87462
92to98: GTCAGGCTACATACCCCTAAGGACCGTTCAGA	0	0	0	0	0	2.95821
93G: TCAGGCTACATACCCCTGGTTCTATAAGGACC	0	0	0	254780	167321	293537
93to94ATATACCCCTC: CATACCCCTGATATACCCCTCCTATAAGGACC	0	0	0	11253.1	11566.6	6303.94
94AAGGACCGT: CATACCCCTGTAAGGACCGTTCTATAAGGACC	553368	208552	411312	0	0	0
94AAGGGCCGT: CATACCCCTGTAAGGGCCGTTCTATAAGGACC	148.727	48.2359	89.4373	0	0	0
94AGG: GCTACATACCCCTGTAGGTCTATAAGGACCGT	0	4.01966	0	0	2455.31	56.206
94ATGTATAT: ACATACCCCTGTATGTATATTCTATAAGGACC	16.0786	0	8.03931	7479.49	951.554	17.7492
94to85AAGGGG: ACATACCCCTGTAAGGGGTATAAGGACCGTTC	104.511	0	44.2162	8256.23	23971.3	41385.3
94to98: GTCAGGCTACATACCCCTGTAAGGACCGTTCA	2029.93	17.0835	632.091	55.5533	59.164	38.4567
94T: GCTACATACCCCTGTTTCTATAAGGACCGTTC	0	0	0	19015.4	41488.8	39879.6
wt: GTCAGGCTACATACCCCTGTTCTATAAGGACC	1499.51	489.622	651.184	4092.76	10191	1051.64

## Sheet: all Meth 1 log
	Meth 1 1	Meth 1 2	Meth 1 3	Meth T1 2 1	Meth T1 2 2	Meth T1 2 3
59to96: CAATGGCTGTCTATAAGGACCGTTCAGAGAGC	3.70751		3.81443
70to93TCCTGTCAGACTACTATAAGTCTG: CACATCCTGTCAGACTACTATAAGTCTGTCTA				13.7639	14.7105	15.4416
73to105 CTTGCTCTGCACACCCGTTCAGAGAGCATATCGGCT				10.5623	11.8582	12.3485
73to106A: TTGCTCTGCACACCCATTCAGAGAGCATATCG						1.56472
76to95AAGGGG: CACACCCTGTAAGGGGTATAAGGACCGTTCAG				1.01444
84to95: CCCTGTCAGGCTACTATAAGGACCGTTCAGAG				17.5242	17.2157	17.0557
85to93GGG: CCTGTCAGGCTACAGGGTCTATAAGGACCGTT				15.7088	16.781	16.4289
85to96: GCACACCCTGTCAGGCTACAATAAGGACCGTT				4.1019	4.88665	4.65219
87to97: CACCCTGTCAGGCTACATATAAGGACCGTTCA					11.9437	12.4588
90to91TATATACTATAAGGACC: ACATACCCTATATACTATAAGGACCGTTCTAT	7.80149	3.177	6.45002
90to92: CTGTCAGGCTACATACCCTTCTATAAGGACCG	15.9904	12.3416	14.7053	11.6497	11.8505	13.1771
90to94TATATA: CAGGCTACATACCCTATATACTATAAGGACCG	19.3233	17.3622	18.885
91to92A: TCAGGCTACATACCCCATTCTATAAGGACCGT				17.0121	17.4806	17.0731
91to96: TGTCAGGCTACATACCCCATAAGGACCGTTCA	14.2724	12.2904	14.1761
92to93ATATTT: GCTACATACCCCTATATTTTCTATAAGGACCG				10.943	11.5136	11.9425
92to93: GTCAGGCTACATACCCCTTCTATAAGGACCGT				11.1366	13.44	12.6146
92to94: GTCAGGCTACATACCCCTCTATAAGGACCGTT	16.1552	13.0732	15.8194	15.8846	16.7052	16.3088
92to95: GTCAGGCTACATACCCCTTATAAGGACCGTTC
92to96: GTCAGGCTACATACCCCTATAAGGACCGTTCA				17.2405	17.0449	16.6004
92to94CTATA: GGCTACATACCCCTCTATACTATAAGGACCGT
92to95ATAAGGGG: CTACATACCCCTATAAGGGGTATAAGGACCGT						3.14969
92to98: GTCAGGCTACATACCCCTAAGGACCGTTCAGA						1.56472
93G: TCAGGCTACATACCCCTGGTTCTATAAGGACC				17.9589	17.3523	18.1632
93to94ATATACCCCTC: CATACCCCTGATATACCCCTCCTATAAGGACC				13.458	13.4977	12.622
94AAGGACCGT: CATACCCCTGTAAGGACCGTTCTATAAGGACC	19.0779	17.67	18.6499
94AAGGGCCGT: CATACCCCTGTAAGGGCCGTTCTATAAGGACC	7.21653	5.59203	6.48281
94AGG: GCTACATACCCCTGTAGGTCTATAAGGACCGT		2.00707			11.2617	5.81265
94ATGTATAT: ACATACCCCTGTATGTATATTCTATAAGGACC	4.00707		3.00707	12.8687	9.89414	4.14969
94to85AAGGGG: ACATACCCCTGTAAGGGGTATAAGGACCGTTC	6.70751		5.4665	13.0113	14.549	15.3368
94to98: GTCAGGCTACATACCCCTGTAAGGACCGTTCA	10.9872	4.09453	9.30399	5.7958	5.88665	5.26516
94T: GCTACATACCCCTGTTTCTATAAGGACCGTTC				14.2149	15.3404	15.2834
wt: GTCAGGCTACATACCCCTGTTCTATAAGGACC	10.5503	8.93552	9.34692	11.9989	13.315	10.0384

## Sheet: all Meth 2 raw
	meth t2 1 1	meth t2 1 2	meth t2 1 3	meth t2 2 1	meth t2 2 2	meth t2 2 3	meth t2 3 1	meth t2 3 2	meth t2 3 3
54to110: AACGACTGCCGTCCAATGGCTGTCTTGCTCTGCACA							2
55to110: AACGACTGCCCTCCACATGGCTGTCTTGCTCTGCAC
55to89: AACGACTGCCGTCCACGCGGACCGCATCCTCAAACC							15210	4612	5584
66to92: TGCCGTCCACTGGTTCAACCGCATCCTCAAACCCAA
67to105: TGCCGTCCACTGGTTCAAACCCAATGGCTGTCTTGC				920	1024	11264
71to82: GTCCACTGGTTCAACCTGAAGGAGGCGGACCGCATC
71to84AAG: ACTGGTTCAACCTGAAGGGAGGCGGACCGCATCCTC
71to85AA: CACTGGTTCAACCTGAAGAGGCGGACCGCATCCTCA
71to87AA: CACTGGTTCAACCTGAAGGCGGACCGCATCCTCAAA
71to88ACC: CACTGGTTCAACCTGACCGCGGACCGCATCCTCAAA
71to90AA: CACTGGTTCAACCTGAAGGACCGCATCCTCAAACCC
73to93			0	1144
74to88: CACTGGTTCAACCTGGAGGCGGACCGCATCCTCAAA
74to91: CACTGGTTCAACCTGGAGGACCGCATCCTCAAACCC				1224	350	1142
76to88T: CTGGTTCAACCTGGAGAATGCGGACCGCATCCTCAA
77to88: CTGGAGAAGGCGGACCGCATCCTCAAACCCAATGGC	29276	9192	12868	2134	1604	10960
77to89A: CTGGTTCAACCTGGAGAAGACGGACCGCATCCTCAA
78to88: CTGGTTCAACCTGGAGAAGTGCGGACCGCATCCTCA
78to89: TGGTTCAACCTGGAGAAGTCGGACCGCATCCTCAAA				15970	3052	11514
78to90: TGGTTCAACCTGGAGAAGTGGACCGCATCCTCAAAC	28	38	56
79to88GACC: GGTTCAACCTGGAGAAGTTGACCGCGGACCGCATCC
79to89: GGTTCAACCTGGAGAAGTTCGGACCGCATCCTCAAA							6036	1032	2574
79to91: GGTTCAACCTGGAGAAGTTGACCGCATCCTCAAACC	67022	40334	93770				432	88	156
81to90: TTCAACCTGGAGAAGTTCCGGACCGCATCCTCAAAC	234						318	266
81to91: TTCAACCTGGAGAAGTTCCGACCGCATCCTCAAACC
81to94: TTCAACCTGGAGAAGTTCCCGCATCCTCAAACCCAA	494			752		1674
81to95: TTCAACCTGGAGAAGTTCCGCATCCTCAAACCCAAT							772	334
82to102: TCAACCTGGAGAAGTTCCTCAAACCCAATGGCTGTC					338	718	2		2
82to116: TCAACCTGGAGAAGTTCCTGTCTTGCTCTGCACACC							45514	3598	11416
82to120: TCAACCTGGAGAAGTTCCTTGCTCTGCACACCCTGT	428	212
83to88: CAACCTGGAGAAGTTCCTGGCGGACCGCATCCTCAA							3016	452	1556
83to90: CAACCTGGAGAAGTTCCTGCGGACCGCATCCTCAAA				11506	12438	36792
83to152: CAACCTGGAGAAGTTCCTGTGTTCTATAAGGACCGT
83to153G: CAACCTGGAGAAGTTCCTGGGTTCTATAAGGACCGT	242	88	90
84to87: AACCTGGAGAAGTTCCTGAGGCGGACCGCATCCTCA	8	2	2	8		12	16	4	8
84to89: AACCTGGAGAAGTTCCTGACGGACCGCATCCTCAAA	90	58	62	24	14	20	38	8	24
84to153: AACCTGGAGAAGTTCCTGAGTTCTATAAGGACCGTT
84to88CC: ACCTGGAGAAGTTCCTGACCGCGGACCGCATCCTCA	135310	43544	76070
84to95CC: ACCTGGAGAAGTTCCTGACCGCATCCTCAAACCCAA	1986				566		894
85to88C: CCTGGAGAAGTTCCTGAACGCGGACCGCATCCTCAA	442	144	196	130	76	148	202	34	102
85to92: CCTGGAGAAGTTCCTGAAACCGCATCCTCAAACCCA	14	8		2
85to93: CCTGGAGAAGTTCCTGAACCGCATCCTCAAACCCAA	15420	3378	4
85to96ACCA: CCTGGAGAAGTTCCTGAAACCACATCCTCAAACCCA	4900	3228	8
85to110CCTGAAAGGGATGGGAGGAGCCAGCCCTCCAC: AACCTGAAAGGGATGGGAGGAGCCAGCCCTCCACAT	1906	868				6
86CCATTGGGTGT: GAAGTTCCTGAAGCCATTGGGTGTGAGGCGGACCGC	8	2
86CCATTGGGTTT: AAGTTCCTGAAGCCATTGGGTTTGAGGCGGACCGCA	21326	3118				22			14
86to86: CTGGAGAAGTTCCTGAAGAGGCGGACCGCATCCTCA	1640	1916	2
86to91TT: CTGGAGAAGTTCCTGAAGTTGACCGCATCCTCAAAC	2
87CCATTGGGTTTG: AAGTTCCTGAAGGCCATTGGGTTTGAGGCGGACCGC							8474	5414	1602
87G: TGGAGAAGTTCCTGAAGGGAGGCGGACCGCATCCTC				167486	47414	118962
87to89: TGGAGAAGTTCCTGAAGGCGGACCGCATCCTCAAAC	52494	18410	32064	296870	103900	244264	406700	120428	275730
87to91: TGGAGAAGTTCCTGAAGGGACCGCATCCTCAAACCC							17268	4568	16576
87to92TGG: AGAAGTTCCTGAAGGTGGACCGCATCCTCAAACCCA	28	12	12	150	70	92	158	58	122
88to92: GGAGAAGTTCCTGAAGGAACCGCATCCTCAAACCCA	4840	3392	2304	1294	2984	16330
88to93: GGAGAAGTTCCTGAAGGACCGCATCCTCAAACCCAA	150932	57640	87718	32618	18786	63472	71274	16008	61868
89GAAGAATAGGGAGGACAAAACAAACAATCTTACTAAGCCTAAGCCTTACTAAG	0	0	0	1062	316	1182	0	4	0
wt: GGTTCAACCTGGAGAAGTTCCTGAAGGAGGCGGACC	37086	11994	25920	42364	9100	12750	13156	1862	23328

## Sheet: all Meth 2 normalized
	meth t2 1 1	meth t2 1 2	meth t2 1 3	meth t2 2 1	meth t2 2 2	meth t2 2 3	meth t2 3 1	meth t2 3 2	meth t2 3 3
54to110: AACGACTGCCGTCCAATGGCTGTCTTGCTCTGCACA
55to110: AACGACTGCCCTCCACATGGCTGTCTTGCTCTGCAC
55to89: AACGACTGCCGTCCACGCGGACCGCATCCTCAAACC							24760.4	27610.5	12770.7
66to92: TGCCGTCCACTGGTTCAACCGCATCCTCAAACCCAA
67to105: TGCCGTCCACTGGTTCAAACCCAATGGCTGTCTTGC				1499.06	4774.34	20236.7
71to82: GTCCACTGGTTCAACCTGAAGGAGGCGGACCGCATC
71to84AAG: ACTGGTTCAACCTGAAGGGAGGCGGACCGCATCCTC
71to85AA: CACTGGTTCAACCTGAAGAGGCGGACCGCATCCTCA
71to87AA: CACTGGTTCAACCTGAAGGCGGACCGCATCCTCAAA
71to88ACC: CACTGGTTCAACCTGACCGCGGACCGCATCCTCAAA
71to90AA: CACTGGTTCAACCTGAAGGACCGCATCCTCAAACCC
73to93				1864.04	0	0
74to88: CACTGGTTCAACCTGGAGGCGGACCGCATCCTCAAA
74to91: CACTGGTTCAACCTGGAGGACCGCATCCTCAAACCC				1994.4	1631.85	2051.69
76to88T: CTGGTTCAACCTGGAGAATGCGGACCGCATCCTCAA
77to88: CTGGAGAAGGCGGACCGCATCCTCAAACCCAATGGC	53415.6	43643.4	36130.6	3477.16	7478.55	19690.5
77to89A: CTGGTTCAACCTGGAGAAGACGGACCGCATCCTCAA
78to88: CTGGTTCAACCTGGAGAAGTGCGGACCGCATCCTCA
78to89: TGGTTCAACCTGGAGAAGTCGGACCGCATCCTCAAA				26021.6	14229.8	20685.8
78to90: TGGTTCAACCTGGAGAAGTGGACCGCATCCTCAAAC	51.0874	180.423	157.236
79to88GACC: GGTTCAACCTGGAGAAGTTGACCGCGGACCGCATCC
79to89: GGTTCAACCTGGAGAAGTTCGGACCGCATCCTCAAA							9826.01	6178.24	5886.79
79to91: GGTTCAACCTGGAGAAGTTGACCGCATCCTCAAACC	122285	191505	263286				703.253	526.826	356.775
81to90: TTCAACCTGGAGAAGTTCCGGACCGCATCCTCAAAC	426.945	0	0				517.673	1592.45	0
81to91: TTCAACCTGGAGAAGTTCCGACCGCATCCTCAAACC
81to94: TTCAACCTGGAGAAGTTCCCGCATCCTCAAACCCAA	901.328	0	0	1225.31	0	3007.47
81to95: TTCAACCTGGAGAAGTTCCGCATCCTCAAACCCAAT							1256.74	1999.55	0
82to102: TCAACCTGGAGAAGTTCCTCAAACCCAATGGCTGTC				0	1575.9	1289.94	3.2558	0	4.57404
82to116: TCAACCTGGAGAAGTTCCTGTCTTGCTCTGCACACC							74092.3	21540	26108.6
82to120: TCAACCTGGAGAAGTTCCTTGCTCTGCACACCCTGT	780.908	1006.57	0
83to88: CAACCTGGAGAAGTTCCTGGCGGACCGCATCCTCAA							4909.75	2705.97	3558.6
83to90: CAACCTGGAGAAGTTCCTGCGGACCGCATCCTCAAA				18748	57991.4	66099.7
83to152: CAACCTGGAGAAGTTCCTGTGTTCTATAAGGACCGT
83to153G: CAACCTGGAGAAGTTCCTGGGTTCTATAAGGACCGT	441.541	417.822	252.701
84to87: AACCTGGAGAAGTTCCTGAGGCGGACCGCATCCTCA	14.5964	9.49595	5.61558	13.0353	0	21.5589	26.0464	23.9466	18.2962
84to89: AACCTGGAGAAGTTCCTGACGGACCGCATCCTCAAA	164.21	275.383	174.083	39.1058	65.2741	35.9316	61.8602	47.8933	54.8885
84to153: AACCTGGAGAAGTTCCTGAGTTCTATAAGGACCGTT
84to88CC: ACCTGGAGAAGTTCCTGACCGCGGACCGCATCCTCA	246880	206746	213589
84to95CC: ACCTGGAGAAGTTCCTGACCGCATCCTCAAACCCAA	3623.56	0	0	0	2638.94	0	1455.34	0	0
85to88C: CCTGGAGAAGTTCCTGAACGCGGACCGCATCCTCAA	806.452	683.709	550.327	211.823	354.345	265.893	328.836	203.547	233.276
85to92: CCTGGAGAAGTTCCTGAAACCGCATCCTCAAACCCA	25.5437	37.9838	0	3.25882	0	0
85to93: CCTGGAGAAGTTCCTGAACCGCATCCTCAAACCCAA	28134.6	16038.7	11.2312
85to96ACCA: CCTGGAGAAGTTCCTGAAACCACATCCTCAAACCCA	8940.3	15326.5	22.4623
85to110CCTGAAAGGGATGGGAGGAGCCAGCCCTCCAC: AACCTGAAAGGGATGGGAGGAGCCAGCCCTCCACAT	3477.59	4121.24	0	0	0	10.7795
86CCATTGGGTGT: GAAGTTCCTGAAGCCATTGGGTGTGAGGCGGACCGC	14.5964	9.49595	0
86CCATTGGGTTT: AAGTTCCTGAAGCCATTGGGTTTGAGGCGGACCGCA	38910.4	14804.2	0	0	0	39.5247	0	0	32.0183
86to86: CTGGAGAAGTTCCTGAAGAGGCGGACCGCATCCTCA	2992.26	9097.12	5.61558
86to91TT: CTGGAGAAGTTCCTGAAGTTGACCGCATCCTCAAAC	3.6491	0	0
87CCATTGGGTTTG: AAGTTCCTGAAGGCCATTGGGTTTGAGGCGGACCGC							13794.8	32411.8	3663.81
87G: TGGAGAAGTTCCTGAAGGGAGGCGGACCGCATCCTC				272903	221065	213724
87to89: TGGAGAAGTTCCTGAAGGCGGACCGCATCCTCAAAC	95778	87410.3	90029	483722	484427	438839	662067	720962	630600
87to91: TGGAGAAGTTCCTGAAGGGACCGCATCCTCAAACCC							28110.6	27347.1	37909.7
87to92TGG: AGAAGTTCCTGAAGGTGGACCGCATCCTCAAACCCA	51.0874	56.9757	33.6935	244.411	326.371	165.285	257.208	347.226	279.017
88to92: GGAGAAGTTCCTGAAGGAACCGCATCCTCAAACCCA	8830.83	16105.1	6469.15	2108.45	13912.7	29338.1
88to93: GGAGAAGTTCCTGAAGGACCGCATCCTCAAACCCAA	275383	273673	246294	53148	87588.6	114032	116027	95834.5	141493
89GAAGAATAGGGAGGACAAAACAAACAATCTTACTAAGCCTAAGCCTTACTAAG				1730.43	1473.33	2123.55	0	23.9466	0
wt: GGTTCAACCTGGAGAAGTTCCTGAAGGAGGCGGACC	67665.3	56947.2	72777.9	69028.2	42428.2	22906.4	21416.7	11147.2	53351.6

## Sheet: all Meth 2 log
	meth t2 1 1	meth t2 1 2	meth t2 1 3	meth t2 2 1	meth t2 2 2	meth t2 2 3	meth t2 3 1	meth t2 3 2	meth t2 3 3
54to110: AACGACTGCCGTCCAATGGCTGTCTTGCTCTGCACA
55to110: AACGACTGCCCTCCACATGGCTGTCTTGCTCTGCAC
55to89: AACGACTGCCGTCCACGCGGACCGCATCCTCAAACC							14.5957	14.7529	13.6406
66to92: TGCCGTCCACTGGTTCAACCGCATCCTCAAACCCAA
67to105: TGCCGTCCACTGGTTCAAACCCAATGGCTGTCTTGC				10.5498	12.2211	14.3047
71to82: GTCCACTGGTTCAACCTGAAGGAGGCGGACCGCATC
71to84AAG: ACTGGTTCAACCTGAAGGGAGGCGGACCGCATCCTC
71to85AA: CACTGGTTCAACCTGAAGAGGCGGACCGCATCCTCA
71to87AA: CACTGGTTCAACCTGAAGGCGGACCGCATCCTCAAA
71to88ACC: CACTGGTTCAACCTGACCGCGGACCGCATCCTCAAA
71to90AA: CACTGGTTCAACCTGAAGGACCGCATCCTCAAACCC
73to93				10.8642
74to88: CACTGGTTCAACCTGGAGGCGGACCGCATCCTCAAA
74to91: CACTGGTTCAACCTGGAGGACCGCATCCTCAAACCC				10.9617	10.6723	11.0026
76to88T: CTGGTTCAACCTGGAGAATGCGGACCGCATCCTCAA
77to88: CTGGAGAAGGCGGACCGCATCCTCAAACCCAATGGC	15.705	15.4135	15.1409	11.7637	12.8685	14.2652
77to89A: CTGGTTCAACCTGGAGAAGACGGACCGCATCCTCAA
78to88: CTGGTTCAACCTGGAGAAGTGCGGACCGCATCCTCA
78to89: TGGTTCAACCTGGAGAAGTCGGACCGCATCCTCAAA				14.6674	13.7966	14.3364
78to90: TGGTTCAACCTGGAGAAGTGGACCGCATCCTCAAAC	5.6749	7.49524	7.29679
79to88GACC: GGTTCAACCTGGAGAAGTTGACCGCGGACCGCATCC
79to89: GGTTCAACCTGGAGAAGTTCGGACCGCATCCTCAAA							13.2624	12.593	12.5233
79to91: GGTTCAACCTGGAGAAGTTGACCGCATCCTCAAACC	16.8999	17.547	18.0063				9.4579	9.04118	8.47887
81to90: TTCAACCTGGAGAAGTTCCGGACCGCATCCTCAAAC	8.73791						9.0159	10.637
81to91: TTCAACCTGGAGAAGTTCCGACCGCATCCTCAAACC
81to94: TTCAACCTGGAGAAGTTCCCGCATCCTCAAACCCAA	9.81591			10.2589		11.5543
81to95: TTCAACCTGGAGAAGTTCCGCATCCTCAAACCCAAT							10.2955	10.9655
82to102: TCAACCTGGAGAAGTTCCTCAAACCCAATGGCTGTC					10.622	10.3331	1.70301		2.19347
82to116: TCAACCTGGAGAAGTTCCTGTCTTGCTCTGCACACC							16.177	14.3947	14.6722
82to120: TCAACCTGGAGAAGTTCCTTGCTCTGCACACCCTGT	9.60901	9.97523
83to88: CAACCTGGAGAAGTTCCTGGCGGACCGCATCCTCAA							12.2614	11.4019	11.7971
83to90: CAACCTGGAGAAGTTCCTGCGGACCGCATCCTCAAA				14.1944	15.8236	16.0124
83to152: CAACCTGGAGAAGTTCCTGTGTTCTATAAGGACCGT
83to153G: CAACCTGGAGAAGTTCCTGGGTTCTATAAGGACCGT	8.7864	8.70674	7.98129
84to87: AACCTGGAGAAGTTCCTGAGGCGGACCGCATCCTCA	3.86754	3.24731	2.48944	3.70435		4.43021	4.70301	4.58175	4.19347
84to89: AACCTGGAGAAGTTCCTGACGGACCGCATCCTCAAA	7.35939	8.10529	7.44363	5.28931	6.02844	5.16718	5.95094	5.58175	5.77843
84to153: AACCTGGAGAAGTTCCTGAGTTCTATAAGGACCGTT
84to88CC: ACCTGGAGAAGTTCCTGACCGCGGACCGCATCCTCA	17.9135	17.6575	17.7045
84to95CC: ACCTGGAGAAGTTCCTGACCGCATCCTCAAACCCAA	11.8232				11.3657		10.5071
85to88C: CCTGGAGAAGTTCCTGAACGCGGACCGCATCCTCAA	9.65544	9.41724	9.10414	7.72672	8.46901	8.0547	8.36122	7.66921	7.86589
85to92: CCTGGAGAAGTTCCTGAAACCGCATCCTCAAACCCA	4.6749	5.24731		1.70435
85to93: CCTGGAGAAGTTCCTGAACCGCATCCTCAAACCCAA	14.7801	13.9693	3.48944
85to96ACCA: CCTGGAGAAGTTCCTGAAACCACATCCTCAAACCCA	13.1261	13.9037	4.48944
85to110CCTGAAAGGGATGGGAGGAGCCAGCCCTCCAC: AACCTGAAAGGGATGGGAGGAGCCAGCCCTCCACAT	11.7639	12.0089				3.43021
86CCATTGGGTGT: GAAGTTCCTGAAGCCATTGGGTGTGAGGCGGACCGC	3.86754	3.24731
86CCATTGGGTTT: AAGTTCCTGAAGCCATTGGGTTTGAGGCGGACCGCA	15.2479	13.8537				5.30468			5.00082
86to86: CTGGAGAAGTTCCTGAAGAGGCGGACCGCATCCTCA	11.547	13.1512	2.48944
86to91TT: CTGGAGAAGTTCCTGAAGTTGACCGCATCCTCAAAC	1.86754
87CCATTGGGTTTG: AAGTTCCTGAAGGCCATTGGGTTTGAGGCGGACCGC							13.7518	14.9842	11.8391
87G: TGGAGAAGTTCCTGAAGGGAGGCGGACCGCATCCTC				18.058	17.7541	17.7054
87to89: TGGAGAAGTTCCTGAAGGCGGACCGCATCCTCAAAC	16.5474	16.4155	16.4581	18.8838	18.8859	18.7433	19.3366	19.4596	19.2664
87to91: TGGAGAAGTTCCTGAAGGGACCGCATCCTCAAACCC							14.7788	14.7391	15.2103
87to92TGG: AGAAGTTCCTGAAGGTGGACCGCATCCTCAAACCCA	5.6749	5.83228	5.0744	7.93317	8.35037	7.36881	8.00679	8.43973	8.12421
88to92: GGAGAAGTTCCTGAAGGAACCGCATCCTCAAACCCA	13.1083	13.9752	12.6594	11.042	13.7641	14.8405
88to93: GGAGAAGTTCCTGAAGGACCGCATCCTCAAACCCAA	18.0711	18.0621	17.91	15.6977	16.4185	16.7991	16.8241	16.5483	17.1104
89GAAGAATAGGGAGGACAAAACAAACAATCTTACTAAGCCTAAGCCTTACTAAG				10.7569	10.5249	11.0523		4.58175
wt: GGTTCAACCTGGAGAAGTTCCTGAAGGAGGCGGACC	16.0461	15.7973	16.1512	16.0749	15.3727	14.4835	14.3864	13.4444	15.7032

## Sheet: mCherry T1 raw
	mCherry T1 1 1	mCherry T1 1 2	mCherry T1 2 1	mCherry T1 2 2	mCherry T1 3 1	mCherry T1 3 2
43to83: AACGGCCACGAGCACCCAGACCGCCAAG		1019
53to118: ACGAGTTCGAGATCGGCCCCCTGCCCTT					451
53to122: CCACGAGTTCGAGATCGGCCCCCTGCTG
54to109: AGTTCGAGATCGACCAAGGGTGGCCCCC					5290	1339
54to88: GAGTTCGAGATCGACAGACCGCCAAGCT					5144	1466
54to93: CGAGTTCGAGATCGACCGCCAAGCTGAA		1410
55to92: GAGTTCGAGATCGAGACCGCCAAGCTGA			6365	6567
58to84: TCGAGATCGAGGGCACCCAGACCGCCAA					2433	915
59to85: AGTTCGAGATCGAGGGCGCCCAGACCGC					6859	3895
63to110: GAGATCGAGGGCGAGGGTGACCAAGGGT			24	9
63to120: GAGATCGAGGGCGAGGGTGGCCCCCTGC
64to84: GAGATCGAGGGCGAGGGCACCCAGACCG	2624	1350	4	8	2360	8
65to85: AGATCGAGGGCGAGGGCGCCCAGACCGC	9	3
67to78AG: AGGGCGAGGGCGAGAGGAGGGCACCCAG
67to90: GATCGAGGGCGAGGGCGAGACCGCCAAG					17273	2065
68to116G: CGAGGGCGAGGGCGAGGGTGGCCCCCTG	903	337
68to83: GCGAGGGCGAGGCACCCAGACCGCCAAG			2713	4295	4355	1820
69to110: AGGGCGAGGGCGAGGGTGACCAAGGGTG	36	52	114463	54166	48	26
69to116: AGGGCGAGGGCGAGGGTGGCCCCCTGCC	921	349
69to83: GCGAGGGCGAGGGTCACCCAGACCGCCA			824
69to92: AGGGCGAGGGCGAGGGACCGCCAAGCTG	24	20	45439	26338	41	17
70to111: TCGAGGGCGAGGGCGAGGGCGACCAAGG			88	52
70to78: GCGAGGGCGAGGGCGAGGGCACCCAGAC	21	1319	3	3	11	9
70to84: TCGAGGGCGAGGGCGAGGGCACCCAGAC	37409	16022	6072	10996	9263	4659
71to121: GCGAGGGCGAGGGCCCCCTGCCCTTCGC					6	27
71to99: GGGCGAGGGCGAGGGCCAAGCTGAAGGT	6209
73to78: AGGGCGAGGGCCGCGAGGGCACCCAGAC					12157	1770
73to84: AGGGCGAGGGCCGCACCCAGACCGCCAA	2793	15865	10	1954	2311	4
74to115: GGGCGAGGGCCGCCAAGGGTGGCCCCCT	72	626
74to125: GGGCGAGGGCCGCCTGCCCTTCGCCTGG	4	4			4634	6175
74to132: GGGCGAGGGCGAGGGCCGCCTGCCCTTC	3	5			4768	6243
74to99: GAGGGCGAGGGCGAGGGCCGCCAAGCTG			2	2024	2334	3424
75to89: GGGCGAGGGCCGCCCAGACCGCCAAGCT	1855	4
76to77GAGGG: GGGCCGCCCCGAGGGCGAGGGCACCCAG	968	4999
76to78: GGCGAGGGCCGCCCCGAGGGCACCCAGA		1	2243
76to86GAC: GAGGGCCGCCCCGACCCAGACCGCCAAG	4425
78to79: AGGGCCGCCCCTAAGGGCACCCAGACCG			4	2	2045
78to80: GAGGGCCGCCCCTAGGGCACCCAGACCG	6	1114			13101	2674
79to100: GGGCCGCCCCTACAGCTGAAGGTGACCA		1223
79to79G: CGCCCCTACGGAGGGCACCCAGACCGCC	2	4013	6	4	1258
79to79GCG: GGGCCGCCCCTACGGCGAGGGCACCCAG		684
79to92: AGGGCCGCCCCTACCGCCAAGCTGAAGG					6802
80: AGGGCCGCCCCTACGGGGCACCCAGACC				1612
80AGG: GGGCCGCCCTACGAGGAGGGCACCCAGA
80to103: AGGGCCGCCCCTACGCTGAAGGTGACCA		2926
80to81: GCCGCCCCTACGGGCACCCAGACCGCCA			10249	2009
80to83: GGGCCGCCCCTACGGCACCCAGACCGCC		1028	2
80to97: GGGCCGCCCCTACGCCAAGCTGAAGGTG	2198	1274
81to85: GCCGCCCCTACGACCCAGACCGCCAAGC	5656	4632	2	6
82AGG: CCGCCCCTACGAGGAGGGCACCCAGAC			2319	21784	30	14
82TGAGCCCCACGTTCCGCCAGACCG: AGGTGAGCCCCACGTTCCGCCAGACCGGCACCC			2220	1165
84to84GAGGGC: CCCTACGAGGGCGAGGGCACCCAGACCGC		9
wt: GGGCGAGGGCCGCCCCTACGAGGGCACC	120204	114344	30108	28335	197537	89367

[truncated: 8 more sheets: mCherry T1 normalized, mCherry T1 log, mCherry T2 raw, mCherry T2 normalized, mCherry T2 log, Tyr raw, Tyr normalized, Tyr log]
