# Supplementary material for: Lineage tracing of genome-edited alleles reveals high fidelity axolotl limb regeneration
Source: eLife. 2017 Sep 16;6:e25726. doi: 10.7554/eLife.25726 (PMC5621835; doi:10.7554/eLife.25726)
Supplement: Figure 4—source data 1. [file elife-25726-fig4-data1.xlsx]

## Sheet: Sheet1
name
	% mutant	% change allelic id 1 to 2	% change 2 to 3	# of alleles
egfp1	0.770185	0.23711	0.231999	51
egfp2	0.811641	0.47871	0.168963	39
egfp3	0.851878	0.394371	0.207878	46
egfp4	0.926935	0.633485	0.251284	22
meth1	0.9985	0.487431	0.185634	12
meth2	0.995907	0.191209	0.164538	19
meth23	0.978583	0.0868494	0.0889019	25
meth21	0.932335	0.101065	0.161335	17
meth22	0.930972	0.0959454	0.165761	18
tyr1	0.768316	0.24732	0.158667	34
tyr2	0.136481	0.099552	0.065021	31
tyr3	0.0897257	0.046562	0.0201467	19
tyr4	0.536515	0.089135		40
rfp 1	0.363398	0.132192		21
rfp 2	0.369207	0.173151		25
rfp 3	0.869682	0.257846		21
rfp21	0.555161	0.402215		25
rfp22	0.992011	0.159604		31
rfp23	0.89515	0.288415		23
(AVERAGES	0.724873	0.242219	0.155844	27.3158
STDEV	0.286451	0.161271	0.0645699	10.2292
