# Supplementary material for: Lineage tracing of genome-edited alleles reveals high fidelity axolotl limb regeneration
Source: eLife. 2017 Sep 16;6:e25726. doi: 10.7554/eLife.25726 (PMC5621835; doi:10.7554/eLife.25726)
Supplement: Figure 5—source data 1. [file elife-25726-fig5-data1.xlsx]

## Sheet: egfp raw
	nerve	vessel	bone	skin	blood	muscle	hand			limb 1	limb 2	limb3
17to55GAACGTGGACTC: ATGCCACGAACGTGGACTCCAAGCTGC	0	0	0	0	0	0	0		17to55GAACGTGGACTC: ATGCCACGAACGTGGACTCCAAGCTGC	6	2	0
18to54CCAC: CGATGCCACCCCACGCAAGCTGCCCGT	0	0	0	0	0	0	0		18to54CCAC: CGATGCCACCCCACGCAAGCTGCCCGT	10	0	0
30to62: CTACGGCAAGCTGCCCGTGCCCTGGCC	0	0	1913	3495	4297	2222	12960		30to62: CTACGGCAAGCTGCCCGTGCCCTGGCC	23104	8346	9934
34to54: GCAAGCTGACCGCAAGCTGCCCGTGCC	0	0	0	0	0	0	0		34to54: GCAAGCTGACCGCAAGCTGCCCGTGCC	42	0	6
34to65: CTACGGCAAGCTGACCGTGCCCTGGCC	0	0	0	0	3	5	24		34to65: CTACGGCAAGCTGACCGTGCCCTGGCC	20	0	2
39to60: GCTGACCCTGAAGCTGCCCGTGCCCTG	0	0	0	0	0	0	0		39to60: GCTGACCCTGAAGCTGCCCGTGCCCTG	228	0	0
43to57: AGCTGACCCTGAAGTTCAAGCTGCCCG	0	0	0	0	0	622	1155		43to57: AGCTGACCCTGAAGTTCAAGCTGCCCG	9250	334	3300
43to58: ACCCTGAAGTTCAGCTGCCCGTGCCCT	0	0	0	0	0	0	3		43to58: ACCCTGAAGTTCAGCTGCCCGTGCCCT	0	0	0
43to58G: GACCCTGAAGTTCAGGCTGCCCGTGCC	0	0	0	0	0	0	0		43to58G: GACCCTGAAGTTCAGGCTGCCCGTGCC	8	0	0
48to56: AAGTTCATCTGCAAGCTGCCCGTGCCC	0	0	3137	15309	9729	10217	31461		48to56: AAGTTCATCTGCAAGCTGCCCGTGCCC	35397	12700	8878
48to60: GAAGTTCATCTGCTGCCCGTGCCCTGG	0	0	0	0	0	0	0		48to60: GAAGTTCATCTGCTGCCCGTGCCCTGG	102	0	0
48to61: GAAGTTCATCTGCGCCCGTGCCCTGGC	0	0	0	0	0	0	0		48to61: GAAGTTCATCTGCGCCCGTGCCCTGGC	18	0	2
48to63: GAAGTTCATCTGCCCGTGCCCTGGCCC	0	0	0	5861	0	1146	12653		48to63: GAAGTTCATCTGCCCGTGCCCTGGCCC	8414	8122	4856
48to64: GAAGTTCATCTGCCGTGCCCTGGCCCA	0	0	191	0	0	0	0		48to64: GAAGTTCATCTGCCGTGCCCTGGCCCA	1702	278	4
48to75: GAAGTTCATCTGCCCACCCTCGTGACC	0	0	0	0	0	0	0		48to75: GAAGTTCATCTGCCCACCCTCGTGACC	688	232	2
49to66TCATTAAGC: TTCATCTGCATCATTAAGCTGCCCGTG	0	0	0	0	0	0	1050		49to66TCATTAAGC: TTCATCTGCATCATTAAGCTGCCCGTG	566	1140	4
50to65: AGTTCATCTGCACGTGCCCTGGCCCAC	483	0	0	11798	604	891	5337		50to65: AGTTCATCTGCACGTGCCCTGGCCCAC	8016	6040	5562
51to52TA: ATCTGCACCTACGGCAAGCTGCCCGTG	0	0	0	0	0	0	0		51to52TA: ATCTGCACCTACGGCAAGCTGCCCGTG	62	5	8
51to54: TTCATCTGCACCGCAAGCTGCCCGTGC	0	0	0	0	0	0	0		51to54: TTCATCTGCACCGCAAGCTGCCCGTGC	4	4	0
51to54GC: ATCTGCACCGCGCAAGCTGCCCGTGCC	0	0	0	0	0	0	0		51to54GC: ATCTGCACCGCGCAAGCTGCCCGTGCC	2	0	0
51to54GGATCGTTTC: CATCTGCACCAGGATCGTTTCGCAAGC	0	0	0	0	0	0	0		51to54GGATCGTTTC: CATCTGCACCAGGATCGTTTCGCAAGC	0	0	0
51to64: AAGTTCATCTGCACCCGTGCCCTGGCC	0	0	0	0	0	0	0		51to64: AAGTTCATCTGCACCCGTGCCCTGGCC	1046	110	122
51to65: AAGTTCATCTGCACCGTGCCCTGGCCC	0	0	328	9039	0	805	10134		51to65: AAGTTCATCTGCACCGTGCCCTGGCCC	6838	3846	1734
51to71: GAAGTTCATCTGCACCTGGCCCACCCT	0	0	206	1684	5316	0	1862		51to71: GAAGTTCATCTGCACCTGGCCCACCCT	4	1094	2
52to56TCTGAAGTT: TCTGCACCATCTGAAGTTCAAGCTGCC	0	0	0	1194	6381	1695	1972		52to56TCTGAAGTT: TCTGCACCATCTGAAGTTCAAGCTGCC	0	0	0
52to57: AGTTCATCTGCACCAAGCTGCCCGTGC	0	8485	13868	45956	15219	18449	70812		52to57: AGTTCATCTGCACCAAGCTGCCCGTGC	115570	44914	56750
52to58: GTTCATCTGCACCAGCTGCCCGTGCCC	0	0	0	1226	0	0	0		52to58: GTTCATCTGCACCAGCTGCCCGTGCCC	2	0	0
52to66: AGTTCATCTGCACCATGCCCTGGCCCA	0	0	2	9	0	0	0		52to66: AGTTCATCTGCACCATGCCCTGGCCCA	6	2	0
52to71TCTGCCCGTGCC: TGCACCATCTGCCCGTGCCTGGCCCAC	0	0	0	0	0	0	0		52to71TCTGCCCGTGCC: TGCACCATCTGCCCGTGCCTGGCCCAC	0	0	0
53CG: TCTGCACCACCCGGGCAAGCTGCCCGT	0	0	0	0	0	0	0		53CG: TCTGCACCACCCGGGCAAGCTGCCCGT	572	40	92
53to54: CATCTGCACCACGCAAGCTGCCCGTGC	0	0	0	0	2	0	0		53to54: CATCTGCACCACGCAAGCTGCCCGTGC	0	0	0
53to54ACT: CATCTGCACCACCACTGCAAGCTGCCC	0	0	0	0	0	0	0		53to54ACT: CATCTGCACCACCACTGCAAGCTGCCC	20	0	0
53to54ATCT: ATCTGCACCACCATCTGCAAGCTGCCC	0	0	283	0	4513	393	7549		53to54ATCT: ATCTGCACCACCATCTGCAAGCTGCCC	162	2	2584
53to54T: ATCTGCACCACTGCAAGCTGCCCGTGC	0	0	0	2042	23724	1434	7746		53to54T: ATCTGCACCACTGCAAGCTGCCCGTGC	718	2	4526
53to55AAGTT: CTGCACCACCAAGTTCAAGCTGCCCGT	0	0	0	0	0	0	0		53to55AAGTT: CTGCACCACCAAGTTCAAGCTGCCCGT	4	0	0
53to55ATCTGAACAGAGATAGA: CACCACCATCTGAACAGAGATAGACAA	0	0	0	0	0	0	0		53to55ATCTGAACAGAGATAGA: CACCACCATCTGAACAGAGATAGACAA	0	0	0
53to55CTGCACCACCCTGAAGTT: CACCACCCTGCACCACCCTGAAGTTCA	0	0	0	0	0	0	0		53to55CTGCACCACCCTGAAGTT: CACCACCCTGCACCACCCTGAAGTTCA	2	0	0
53to55TGCAC: ATCTGCACCACCTGCACCAAGCTGCCC	0	0	0	1860	0	721	5931		53to55TGCAC: ATCTGCACCACCTGCACCAAGCTGCCC	3354	6138	2946
53to55TGCATT: TCTGCACCACTGCATTCAAGCTGCCCG	0	0	0	0	675	0	0		53to55TGCATT: TCTGCACCACTGCATTCAAGCTGCCCG	0	0	0
53to56: TCATCTGCACCACAAGCTGCCCGTGCC	0	0	0	1288	520	0	0		53to56: TCATCTGCACCACAAGCTGCCCGTGCC	3716	5064	24
53to58: TTCATCTGCACCACGCTGCCCGTGCCC	0	0	11	45	12	18	66		53to58: TTCATCTGCACCACGCTGCCCGTGCCC	68	40	40
53to66CTCGTGACCAAGC: TGCACCACCCTCGTGACCAAGCTGCCC	0	0	0	0	0	0	0		53to66CTCGTGACCAAGC: TGCACCACCCTCGTGACCAAGCTGCCC	0	0	0
54AC: CTGCACCACCGACGCAAGCTGCCCGTG	0	0	0	8064	0	2959	27224		54AC: CTGCACCACCGACGCAAGCTGCCCGTG	36	6242	1900
54CA: TCTGCACCACCGCAGCAAGCTGCCCGT	0	0	0	0	1633	0	0		54CA: TCTGCACCACCGCAGCAAGCTGCCCGT	0	0	0
54T: TCTGCACCACCGTGCAAGCTGCCCGTG	0	0	0	0	2	0	0		54T: TCTGCACCACCGTGCAAGCTGCCCGTG	0	0	0
54TG: TCTGCACCACCGTGGCAAGCTGCCCGT	0	0	0	0	472	724	0		54TG: TCTGCACCACCGTGGCAAGCTGCCCGT	0	2	0
54TGCACGACCCTGAAGTTCATCT: ACCGTGCACGACCCTGAAGTTCATCTG	0	0	0	0	0	0	0		54TGCACGACCCTGAAGTTCATCT: ACCGTGCACGACCCTGAAGTTCATCTG	259	0	340
54to54ATGCCACCTACG: CACCGATGCCACCTACGGCAAGCTGCC	0	0	0	0	0	0	0		54to54ATGCCACCTACG: CACCGATGCCACCTACGGCAAGCTGCC	0	0	2
54to54CTGCCCGTG: GCACCACCGCTGCCCGTGCAAGCTGCC	0	0	384	0	0	0	0		54to54CTGCCCGTG: GCACCACCGCTGCCCGTGCAAGCTGCC	1268	6	2
54to54T: ATCTGCACCACCTGCAAGCTGCCCGTG	0	0	0	0	0	0	0		54to54T: ATCTGCACCACCTGCAAGCTGCCCGTG	42	18	36
54to54TA: CTGCACCACCGTACAAGCTGCCCGTGC	0	0	0	0	0	0	0		54to54TA: CTGCACCACCGTACAAGCTGCCCGTGC	952	88	96
54to54TGCACCACGTTCAT: GCACCACCGTGCACCACGTTCATCAAG	0	0	0	0	0	0	0		54to54TGCACCACGTTCAT: GCACCACCGTGCACCACGTTCATCAAG	1558	166	210
54to54TGCCCTAGCA: CACCGTGCCCTAGCACAAGCTGCCCGT	0	0	0	0	0	0	0		54to54TGCCCTAGCA: CACCGTGCCCTAGCACAAGCTGCCCGT	158	0	0
54to55C: ATCTGCACCACCCCAAGCTGCCCGTGC	0	0	0	1	6	0	0		54to55C: ATCTGCACCACCCCAAGCTGCCCGTGC	10	0	0
54to56: CATCTGCACCACCAAGCTGCCCGTGCC	2	0	0	0	0	0	0		54to56: CATCTGCACCACCAAGCTGCCCGTGCC	386	12	12
54to63TGCCCTGTGCCCTGGCCCA: ACCGTGCCCTGTGCCCTGGCCCACCGT	0	0	0	0	0	0	0		54to63TGCCCTGTGCCCTGGCCCA: ACCGTGCCCTGTGCCCTGGCCCACCGT	56	12	16
54to64: ATCTGCACCACCCGTGCCCTGGCCCAC	0	0	0	0	0	0	0		54to64: ATCTGCACCACCCGTGCCCTGGCCCAC	0	0	0
54to66: TCATCTGCACCACCATGCCCTGGCCCA	0	0	0	0	0	0	0		54to66: TCATCTGCACCACCATGCCCTGGCCCA	0	0	0
54to68: TCATCTGCACCACCACCCTGGCCCACC	0	0	0	0	0	0	0		54to68: TCATCTGCACCACCACCCTGGCCCACC	0	0	0
54to70: ATCTGCACCACCCTGGCCCACCCTCGT	0	0	0	0	0	0	0		54to70: ATCTGCACCACCCTGGCCCACCCTCGT	6	0	4
54to71: ATCTGCACCACCTGGCCCACCCTCGTG	0	0	0	0	0	0	0		54to71: ATCTGCACCACCTGGCCCACCCTCGTG	6	0	0
54to80: ATCTGCACCACCCTCGTGACCACCCTG	0	0	0	0	1099	0	14		54to80: ATCTGCACCACCCTCGTGACCACCCTG	0	2	2
54TT: ATCTGCACCACCGTTGCAAGCTGCCCG	0	0	0	4961	0	742	2096		54TT: ATCTGCACCACCGTTGCAAGCTGCCCG	1366	4366	20
55G: TGCACCACCGGGCAAGCTGCCCGTGCC	0	0	105	670	1356	0	0		55G: TGCACCACCGGGCAAGCTGCCCGTGCC	940	4	0
55to55: TCTGCACCACCGCAAGCTGCCCGTGCC	0	0	3177	18027	45749	7178	6948		55to55: TCTGCACCACCGCAAGCTGCCCGTGCC	2328	600	5780
55to57: CATCTGCACCACCGAGCTGCCCGTGCC	0	0	0	0	0	0	0		55to57: CATCTGCACCACCGAGCTGCCCGTGCC	1792	4188	14
55to57TGC: CTGCACCACCGTGCAGCTGCCCGTGCC	0	0	0	0	0	0	0		55to57TGC: CTGCACCACCGTGCAGCTGCCCGTGCC	4	0	0
55to58T: TCTGCACCACCGTGCTGCCCGTGCCCT	0	0	0	0	0	0	0		55to58T: TCTGCACCACCGTGCTGCCCGTGCCCT	2	0	2
55to59:	0	0	2	0	0	0	0		55to59:	310	32	38
55to60: TCTGCACCACCGCTGCCCGTGCCCTGG	0	0	636	6396	1441	2359	16267		55to60: TCTGCACCACCGCTGCCCGTGCCCTGG	7213	11225	269
55to60TGCC: CTGCACCACCGTGCCCTGCCCGTGCCC	0	0	0	0	0	0	0		55to60TGCC: CTGCACCACCGTGCCCTGCCCGTGCCC	0	0	0
55to62: CATCTGCACCACCGCCCGTGCCCTGGC	0	0	0	0	1045	0	596		55to62: CATCTGCACCACCGCCCGTGCCCTGGC	546	0	2
55to66: GTTCATCTGCACCACCGTGCCCTGGCC	304	0	1466	2787	2404	2239	2392		55to66: GTTCATCTGCACCACCGTGCCCTGGCC	3232	482	1602
55to68: AGTTCATCTGCACCACCGCCCTGGCCC	0	0	0	0	0	592	0		55to68: AGTTCATCTGCACCACCGCCCTGGCCC	0	0	0
56GC: TCTGCACCACCGGCGCAAGCTGCCCGT	0	0	0	705	3788	0	1661		56GC: TCTGCACCACCGGCGCAAGCTGCCCGT	0	0	0
56GCCCCGCGCCACGC: CCGGCGCCCCGCGCCACGCAAGCTGCC	0	0	0	0	0	0	0		56GCCCCGCGCCACGC: CCGGCGCCCCGCGCCACGCAAGCTGCC	4	0	0
56to67: CATCTGCACCACCGGGCCCTGGCCCAC	0	0	2	1	3	3	2		56to67: CATCTGCACCACCGGGCCCTGGCCCAC	0	0	0
57to60: ATCTGCACCACCGGCTGCCCGTGCCCT	0	0	0	0	0	0	0		57to60: ATCTGCACCACCGGCTGCCCGTGCCCT	0	0	0
wildtype: ATCTGCACCACCGGCAAGCTGCCCGTG	138806	4497	23214	45518	50847	14961	65601		wildtype: ATCTGCACCACCGGCAAGCTGCCCGTG	72524	30428	66722
	139595	12982	48925	187936	180840	70375	293516			314719	156328	178447
	7.16358	77.0297	20.4394	5.32096	5.52975	14.2096	3.40697			3.17744	6.39681	5.6039
55to60: TCTGCACCACCGCTGCCCGTGCCCTGG	0	6396	16267	11225
55to60TGCC: CTGCACCACCGTGCCCTGCCCGTGCCC	0	0	0	0
55to62: CATCTGCACCACCGCCCGTGCCCTGGC	0	0	596	0
55to66: GTTCATCTGCACCACCGTGCCCTGGCC	304	2787	2392	482
55to68: AGTTCATCTGCACCACCGCCCTGGCCC	0	0	0	0
55to74: TCTGCACCACCGCCCACCCTCGTGACC	0	0	0	0
56GC: TCTGCACCACCGGCGCAAGCTGCCCGT	0	705	1661	0
56GCCCCGCGCCACGC: CCGGCGCCCCGCGCCACGCAAGCTGCC	0	0	0	0
56to67: CATCTGCACCACCGGGCCCTGGCCCAC	0	1	2	0
56to69GT: ATCTGCACCACCGGGTCCTGGCCCACC	0	0	0	0
57to60: ATCTGCACCACCGGCTGCCCGTGCCCT	0	0	0	0
wildtype: ATCTGCACCACCGGCAAGCTGCCCGTG	138806	45518	65601	30428

## Sheet: egfp normalized
	nerve	vessel	bone	skin	blood	muscle	hand			limb 1	limb 2	limb3
17to55GAACGTGGACTC: ATGCCACGAACGTGGACTCCAAGCTGC	0	0	0	0	0	0	0		17to55GAACGTGGACTC: ATGCCACGAACGTGGACTCCAAGCTGC	19.0646	12.7936	0
18to54CCAC: CGATGCCACCCCACGCAAGCTGCCCGT	0	0	0	0	0	0	0		18to54CCAC: CGATGCCACCCCACGCAAGCTGCCCGT	31.7744	0	0
30to62: CTACGGCAAGCTGCCCGTGCCCTGGCC	0	0	39100.7	18596.8	23761.3	31573.7	44154.3		30to62: CTACGGCAAGCTGCCCGTGCCCTGGCC	73411.5	53387.7	55669.2
34to54: GCAAGCTGACCGCAAGCTGCCCGTGCC	0	0	0	0	0	0	0		34to54: GCAAGCTGACCGCAAGCTGCCCGTGCC	133.452	0	33.6234
34to65: CTACGGCAAGCTGACCGTGCCCTGGCC	0	0	0	0	16.5893	71.048	81.7673		34to65: CTACGGCAAGCTGACCGTGCCCTGGCC	63.5488	0	11.2078
39to60: GCTGACCCTGAAGCTGCCCGTGCCCTG	0	0	0	0	0	0	0		39to60: GCTGACCCTGAAGCTGCCCGTGCCCTG	724.456	0	0
43to57: AGCTGACCCTGAAGTTCAAGCTGCCCG	0	0	0	0	0	8838.37	3935.05		43to57: AGCTGACCCTGAAGTTCAAGCTGCCCG	29391.3	2136.53	18492.9
43to58: ACCCTGAAGTTCAGCTGCCCGTGCCCT	0	0	0	0	0	0	10.2209		43to58: ACCCTGAAGTTCAGCTGCCCGTGCCCT	0	0	0
43to58G: GACCCTGAAGTTCAGGCTGCCCGTGCC	0	0	0	0	0	0	0		43to58G: GACCCTGAAGTTCAGGCTGCCCGTGCC	25.4195	0	0
48to56: AAGTTCATCTGCAAGCTGCCCGTGCCC	0	0	64118.5	81458.6	53798.9	145179	107187		48to56: AAGTTCATCTGCAAGCTGCCCGTGCCC	112472	81239.4	49751.5
48to60: GAAGTTCATCTGCTGCCCGTGCCCTGG	0	0	0	0	0	0	0		48to60: GAAGTTCATCTGCTGCCCGTGCCCTGG	324.099	0	0
48to61: GAAGTTCATCTGCGCCCGTGCCCTGGC	0	0	0	0	0	0	0		48to61: GAAGTTCATCTGCGCCCGTGCCCTGGC	57.1939	0	11.2078
48to63: GAAGTTCATCTGCCCGTGCCCTGGCCC	0	0	0	31186.1	0	16284.2	43108.4		48to63: GAAGTTCATCTGCCCGTGCCCTGGCCC	26735	51954.9	27212.6
48to64: GAAGTTCATCTGCCGTGCCCTGGCCCA	0	0	3903.93	0	0	0	0		48to64: GAAGTTCATCTGCCGTGCCCTGGCCCA	5408	1778.31	22.4156
48to75: GAAGTTCATCTGCCCACCCTCGTGACC	0	0	0	0	0	0	0		48to75: GAAGTTCATCTGCCCACCCTCGTGACC	2186.08	1484.06	11.2078
49to66TCATTAAGC: TTCATCTGCATCATTAAGCTGCCCGTG	0	0	0	0	0	0	3577.32		49to66TCATTAAGC: TTCATCTGCATCATTAAGCTGCCCGTG	1798.43	7292.36	22.4156
50to65: AGTTCATCTGCACGTGCCCTGGCCCAC	3460.01	0	0	62776.7	3339.97	12660.7	18183		50to65: AGTTCATCTGCACGTGCCCTGGCCCAC	25470.3	38636.7	31168.9
51to52TA: ATCTGCACCTACGGCAAGCTGCCCGTG	0	0	0	0	0	0	0		51to52TA: ATCTGCACCTACGGCAAGCTGCCCGTG	197.001	31.984	44.8312
51to54: TTCATCTGCACCGCAAGCTGCCCGTGC	0	0	0	0	0	0	0		51to54: TTCATCTGCACCGCAAGCTGCCCGTGC	12.7098	25.5872	0
51to54GC: ATCTGCACCGCGCAAGCTGCCCGTGCC	0	0	0	0	0	0	0		51to54GC: ATCTGCACCGCGCAAGCTGCCCGTGCC	6.35488	0	0
51to54GGATCGTTTC: CATCTGCACCAGGATCGTTTCGCAAGC	0	0	0	0	0	0	0		51to54GGATCGTTTC: CATCTGCACCAGGATCGTTTCGCAAGC	0	0	0
51to64: AAGTTCATCTGCACCCGTGCCCTGGCC	0	0	0	0	0	0	0		51to64: AAGTTCATCTGCACCCGTGCCCTGGCC	3323.6	703.649	683.676
51to65: AAGTTCATCTGCACCGTGCCCTGGCCC	0	0	6704.14	48096.2	0	11438.7	34526.2		51to65: AAGTTCATCTGCACCGTGCCCTGGCCC	21727.3	24602.1	9717.17
51to71: GAAGTTCATCTGCACCTGGCCCACCCT	0	0	4210.53	8960.5	29396.2	0	6343.78		51to71: GAAGTTCATCTGCACCTGGCCCACCCT	12.7098	6998.11	11.2078
52to56TCTGAAGTT: TCTGCACCATCTGAAGTTCAAGCTGCC	0	0	0	6353.23	35285.3	24085.3	6718.54		52to56TCTGAAGTT: TCTGCACCATCTGAAGTTCAAGCTGCC	0	0	0
52to57: AGTTCATCTGCACCAAGCTGCCCGTGC	0	653597	283454	244530	84157.3	262153	241254		52to57: AGTTCATCTGCACCAAGCTGCCCGTGC	367216	287306	318022
52to58: GTTCATCTGCACCAGCTGCCCGTGCCC	0	0	0	6523.5	0	0	0		52to58: GTTCATCTGCACCAGCTGCCCGTGCCC	6.35488	0	0
52to66: AGTTCATCTGCACCATGCCCTGGCCCA	0	0	40.8789	47.8886	0	0	0		52to66: AGTTCATCTGCACCATGCCCTGGCCCA	19.0646	12.7936	0
52to71TCTGCCCGTGCC: TGCACCATCTGCCCGTGCCTGGCCCAC	0	0	0	0	0	0	0		52to71TCTGCCCGTGCC: TGCACCATCTGCCCGTGCCTGGCCCAC	0	0	0
53CG: TCTGCACCACCCGGGCAAGCTGCCCGT	0	0	0	0	0	0	0		53CG: TCTGCACCACCCGGGCAAGCTGCCCGT	1817.49	255.872	515.559
53to54: CATCTGCACCACGCAAGCTGCCCGTGC	0	0	0	0	11.0595	0	0		53to54: CATCTGCACCACGCAAGCTGCCCGTGC	0	0	0
53to54ACT: CATCTGCACCACCACTGCAAGCTGCCC	0	0	0	0	0	0	0		53to54ACT: CATCTGCACCACCACTGCAAGCTGCCC	63.5488	0	0
53to54ATCT: ATCTGCACCACCATCTGCAAGCTGCCC	0	0	5784.36	0	24955.8	5584.37	25719.2		53to54ATCT: ATCTGCACCACCATCTGCAAGCTGCCC	514.745	12.7936	14480.5
53to54T: ATCTGCACCACTGCAAGCTGCCCGTGC	0	0	0	10865.4	131188	20376.6	26390.4		53to54T: ATCTGCACCACTGCAAGCTGCCCGTGC	2281.4	12.7936	25363.3
53to55AAGTT: CTGCACCACCAAGTTCAAGCTGCCCGT	0	0	0	0	0	0	0		53to55AAGTT: CTGCACCACCAAGTTCAAGCTGCCCGT	12.7098	0	0
53to55ATCTGAACAGAGATAGA: CACCACCATCTGAACAGAGATAGACAA	0	0	0	0	0	0	0		53to55ATCTGAACAGAGATAGA: CACCACCATCTGAACAGAGATAGACAA	0	0	0
53to55CTGCACCACCCTGAAGTT: CACCACCCTGCACCACCCTGAAGTTCA	0	0	0	0	0	0	0		53to55CTGCACCACCCTGAAGTT: CACCACCCTGCACCACCCTGAAGTTCA	6.35488	0	0
53to55TGCAC: ATCTGCACCACCTGCACCAAGCTGCCC	0	0	0	9896.99	0	10245.1	20206.7		53to55TGCAC: ATCTGCACCACCTGCACCAAGCTGCCC	10657.1	39263.6	16509.1
53to55TGCATT: TCTGCACCACTGCATTCAAGCTGCCCG	0	0	0	0	3732.58	0	0		53to55TGCATT: TCTGCACCACTGCATTCAAGCTGCCCG	0	0	0
53to56: TCATCTGCACCACAAGCTGCCCGTGCC	0	0	0	6853.4	2875.47	0	0		53to56: TCATCTGCACCACAAGCTGCCCGTGCC	11807.4	32393.4	134.494
53to58: TTCATCTGCACCACGCTGCCCGTGCCC	0	0	224.834	239.443	66.357	255.773	224.86		53to58: TTCATCTGCACCACGCTGCCCGTGCCC	216.066	255.872	224.156
53to66CTCGTGACCAAGC: TGCACCACCCTCGTGACCAAGCTGCCC	0	0	0	0	0	0	0		53to66CTCGTGACCAAGC: TGCACCACCCTCGTGACCAAGCTGCCC	0	0	0
54AC: CTGCACCACCGACGCAAGCTGCCCGTG	0	0	0	42908.2	0	42046.2	92751.3		54AC: CTGCACCACCGACGCAAGCTGCCCGTG	114.388	39928.9	10647.4
54CA: TCTGCACCACCGCAGCAAGCTGCCCGT	0	0	0	0	9030.08	0	0		54CA: TCTGCACCACCGCAGCAAGCTGCCCGT	0	0	0
54T: TCTGCACCACCGTGCAAGCTGCCCGTG	0	0	0	0	11.0595	0	0		54T: TCTGCACCACCGTGCAAGCTGCCCGTG	0	0	0
54TG: TCTGCACCACCGTGGCAAGCTGCCCGT	0	0	0	0	2610.04	10287.7	0		54TG: TCTGCACCACCGTGGCAAGCTGCCCGT	0	12.7936	0
54TGCACGACCCTGAAGTTCATCT: ACCGTGCACGACCCTGAAGTTCATCTG	0	0	0	0	0	0	0		54TGCACGACCCTGAAGTTCATCT: ACCGTGCACGACCCTGAAGTTCATCTG	822.956	0	1905.33
54to54ATGCCACCTACG: CACCGATGCCACCTACGGCAAGCTGCC	0	0	0	0	0	0	0		54to54ATGCCACCTACG: CACCGATGCCACCTACGGCAAGCTGCC	0	0	11.2078
54to54CTGCCCGTG: GCACCACCGCTGCCCGTGCAAGCTGCC	0	0	7848.75	0	0	0	0		54to54CTGCCCGTG: GCACCACCGCTGCCCGTGCAAGCTGCC	4028.99	38.3808	11.2078
54to54T: ATCTGCACCACCTGCAAGCTGCCCGTG	0	0	0	0	0	0	0		54to54T: ATCTGCACCACCTGCAAGCTGCCCGTG	133.452	115.143	201.741
54to54TA: CTGCACCACCGTACAAGCTGCCCGTGC	0	0	0	0	0	0	0		54to54TA: CTGCACCACCGTACAAGCTGCCCGTGC	3024.92	562.919	537.975
54to54TGCACCACGTTCAT: GCACCACCGTGCACCACGTTCATCAAG	0	0	0	0	0	0	0		54to54TGCACCACGTTCAT: GCACCACCGTGCACCACGTTCATCAAG	4950.45	1061.87	1176.82
54to54TGCCCTAGCA: CACCGTGCCCTAGCACAAGCTGCCCGT	0	0	0	0	0	0	0		54to54TGCCCTAGCA: CACCGTGCCCTAGCACAAGCTGCCCGT	502.035	0	0
54to55C: ATCTGCACCACCCCAAGCTGCCCGTGC	0	0	0	5.32096	33.1785	0	0		54to55C: ATCTGCACCACCCCAAGCTGCCCGTGC	31.7744	0	0
54to56: CATCTGCACCACCAAGCTGCCCGTGCC	14.3272	0	0	0	0	0	0		54to56: CATCTGCACCACCAAGCTGCCCGTGCC	1226.49	76.7617	67.2469
54to63TGCCCTGTGCCCTGGCCCA: ACCGTGCCCTGTGCCCTGGCCCACCGT	0	0	0	0	0	0	0		54to63TGCCCTGTGCCCTGGCCCA: ACCGTGCCCTGTGCCCTGGCCCACCGT	177.937	76.7617	89.6625
54to64: ATCTGCACCACCCGTGCCCTGGCCCAC	0	0	0	0	0	0	0		54to64: ATCTGCACCACCCGTGCCCTGGCCCAC	0	0	0
54to66: TCATCTGCACCACCATGCCCTGGCCCA	0	0	0	0	0	0	0		54to66: TCATCTGCACCACCATGCCCTGGCCCA	0	0	0
54to68: TCATCTGCACCACCACCCTGGCCCACC	0	0	0	0	0	0	0		54to68: TCATCTGCACCACCACCCTGGCCCACC	0	0	0
54to70: ATCTGCACCACCCTGGCCCACCCTCGT	0	0	0	0	0	0	0		54to70: ATCTGCACCACCCTGGCCCACCCTCGT	19.0646	0	22.4156
54to71: ATCTGCACCACCTGGCCCACCCTCGTG	0	0	0	0	0	0	0		54to71: ATCTGCACCACCTGGCCCACCCTCGTG	19.0646	0	0
54to80: ATCTGCACCACCCTCGTGACCACCCTG	0	0	0	0	6077.2	0	47.6976		54to80: ATCTGCACCACCCTCGTGACCACCCTG	0	12.7936	11.2078
54TT: ATCTGCACCACCGTTGCAAGCTGCCCG	0	0	0	26397.3	0	10543.5	7141.01		54TT: ATCTGCACCACCGTTGCAAGCTGCCCG	4340.38	27928.5	112.078
55G: TGCACCACCGGGCAAGCTGCCCGTGCC	0	0	2146.14	3565.04	7498.34	0	0		55G: TGCACCACCGGGCAAGCTGCCCGTGCC	2986.79	25.5872	0
55to55: TCTGCACCACCGCAAGCTGCCCGTGCC	0	0	64936.1	95921	252981	101996	23671.6		55to55: TCTGCACCACCGCAAGCTGCCCGTGCC	7397.07	3838.08	32390.6
55to57: CATCTGCACCACCGAGCTGCCCGTGCC	0	0	0	0	0	0	0		55to57: CATCTGCACCACCGAGCTGCCCGTGCC	5693.97	26789.8	78.4547
55to57TGC: CTGCACCACCGTGCAGCTGCCCGTGCC	0	0	0	0	0	0	0		55to57TGC: CTGCACCACCGTGCAGCTGCCCGTGCC	12.7098	0	0
55to58T: TCTGCACCACCGTGCTGCCCGTGCCCT	0	0	0	0	0	0	0		55to58T: TCTGCACCACCGTGCTGCCCGTGCCCT	6.35488	0	11.2078
55to59:	0	0	40.8789	0	0	0	0		55to59:	985.006	204.698	212.948
55to60: TCTGCACCACCGCTGCCCGTGCCCTGG	0	0	12999.5	34032.9	7968.37	33520.4	55421.2		55to60: TCTGCACCACCGCTGCCCGTGCCCTGG	22918.9	71804.2	1507.45
55to60TGCC: CTGCACCACCGTGCCCTGCCCGTGCCC	0	0	0	0	0	0	0		55to60TGCC: CTGCACCACCGTGCCCTGCCCGTGCCC	0	0	0
55to62: CATCTGCACCACCGCCCGTGCCCTGGC	0	0	0	0	5778.59	0	2030.55		55to62: CATCTGCACCACCGCCCGTGCCCTGGC	1734.88	0	11.2078
55to66: GTTCATCTGCACCACCGTGCCCTGGCC	2177.73	0	29964.2	14829.5	13293.5	31815.3	8149.47		55to66: GTTCATCTGCACCACCGTGCCCTGGCC	10269.5	3083.26	8977.46
55to68: AGTTCATCTGCACCACCGCCCTGGCCC	0	0	0	0	0	8412.08	0		55to68: AGTTCATCTGCACCACCGCCCTGGCCC	0	0	0
56GC: TCTGCACCACCGGCGCAAGCTGCCCGT	0	0	0	3751.28	20946.7	0	5658.98		56GC: TCTGCACCACCGGCGCAAGCTGCCCGT	0	0	0
56GCCCCGCGCCACGC: CCGGCGCCCCGCGCCACGCAAGCTGCC	0	0	0	0	0	0	0		56GCCCCGCGCCACGC: CCGGCGCCCCGCGCCACGCAAGCTGCC	12.7098	0	0
56to67: CATCTGCACCACCGGGCCCTGGCCCAC	0	0	40.8789	5.32096	16.5893	42.6288	6.81394		56to67: CATCTGCACCACCGGGCCCTGGCCCAC	0	0	0
57to60: ATCTGCACCACCGGCTGCCCGTGCCCT	0	0	0	0	0	0	0		57to60: ATCTGCACCACCGGCTGCCCGTGCCCT	0	0	0
wildtype: ATCTGCACCACCGGCAAGCTGCCCGTG	994348	346403	474481	242199	281171	212590	223501		wildtype: ATCTGCACCACCGGCAAGCTGCCCGTG	230440	194642	373904

## Sheet: egfp log
	nerve	vessel	bone	skin	blood	muscle	hand			limb 1	limb 2	limb3
17to55GAACGTGGACTC: ATGCCACGAACGTGGACTCCAAGCTGC	0	0	0	0	0	0	0		17to55GAACGTGGACTC: ATGCCACGAACGTGGACTCCAAGCTGC	4.32658	3.78593	0
18to54CCAC: CGATGCCACCCCACGCAAGCTGCCCGT	0	0	0	0	0	0	0		18to54CCAC: CGATGCCACCCCACGCAAGCTGCCCGT	5.0345	0	0
30to62: CTACGGCAAGCTGCCCGTGCCCTGGCC	0	0	15.2549	14.1828	14.5364	14.9465	15.4303		30to62: CTACGGCAAGCTGCCCGTGCCCTGGCC	16.1637	15.7042	15.7646
34to54: GCAAGCTGACCGCAAGCTGCCCGTGCC	0	0	0	0	0	0	0		34to54: GCAAGCTGACCGCAAGCTGCCCGTGCC	7.07095	0	5.11368
34to65: CTACGGCAAGCTGACCGTGCCCTGGCC	0	0	0	0	4.13662	6.17089	6.37099		34to65: CTACGGCAAGCTGACCGTGCCCTGGCC	6.01232	0	3.60973
39to60: GCTGACCCTGAAGCTGCCCGTGCCCTG	0	0	0	0	0	0	0		39to60: GCTGACCCTGAAGCTGCCCGTGCCCTG	9.50274	0	0
43to57: AGCTGACCCTGAAGTTCAAGCTGCCCG	0	0	0	0	0	13.1097	11.9425		43to57: AGCTGACCCTGAAGTTCAAGCTGCCCG	14.8432	11.0617	14.1748
43to58: ACCCTGAAGTTCAGCTGCCCGTGCCCT	0	0	0	0	0	0	3.48812		43to58: ACCCTGAAGTTCAGCTGCCCGTGCCCT	0	0	0
43to58G: GACCCTGAAGTTCAGGCTGCCCGTGCC	0	0	0	0	0	0	0		43to58G: GACCCTGAAGTTCAGGCTGCCCGTGCC	4.72353	0	0
48to56: AAGTTCATCTGCAAGCTGCCCGTGCCC	0	0	15.9685	16.3138	15.7153	17.1475	16.7098		48to56: AAGTTCATCTGCAAGCTGCCCGTGCCC	16.7792	16.3099	15.6025
48to60: GAAGTTCATCTGCTGCCCGTGCCCTGG	0	0	0	0	0	0	0		48to60: GAAGTTCATCTGCTGCCCGTGCCCTGG	8.34473	0	0
48to61: GAAGTTCATCTGCGCCCGTGCCCTGGC	0	0	0	0	0	0	0		48to61: GAAGTTCATCTGCGCCCGTGCCCTGGC	5.8628	0	3.60973
48to63: GAAGTTCATCTGCCCGTGCCCTGGCCC	0	0	0	14.9287	0	13.9913	15.3957		48to63: GAAGTTCATCTGCCCGTGCCCTGGCCC	14.7065	15.665	14.732
48to64: GAAGTTCATCTGCCGTGCCCTGGCCCA	0	0	11.9311	0	0	0	0		48to64: GAAGTTCATCTGCCGTGCCCTGGCCCA	12.4011	10.7971	4.5494
48to75: GAAGTTCATCTGCCCACCCTCGTGACC	0	0	0	0	0	0	0		48to75: GAAGTTCATCTGCCCACCCTCGTGACC	11.0948	10.5363	3.60973
49to66TCATTAAGC: TTCATCTGCATCATTAAGCTGCCCGTG	0	0	0	0	0	0	11.8051		49to66TCATTAAGC: TTCATCTGCATCATTAAGCTGCCCGTG	10.8133	12.8324	4.5494
50to65: AGTTCATCTGCACGTGCCCTGGCCCAC	11.757	0	0	15.938	11.7061	13.6282	14.1504		50to65: AGTTCATCTGCACGTGCCCTGGCCCAC	14.6366	15.2377	14.9279
51to52TA: ATCTGCACCTACGGCAAGCTGCCCGTG	0	0	0	0	0	0	0		51to52TA: ATCTGCACCTACGGCAAGCTGCCCGTG	7.62936	5.0437	5.51826
51to54: TTCATCTGCACCGCAAGCTGCCCGTGC	0	0	0	0	0	0	0		51to54: TTCATCTGCACCGCAAGCTGCCCGTGC	3.77713	4.73266	0
51to54GC: ATCTGCACCGCGCAAGCTGCCCGTGCC	0	0	0	0	0	0	0		51to54GC: ATCTGCACCGCGCAAGCTGCCCGTGCC	2.8787	0	0
51to54GGATCGTTTC: CATCTGCACCAGGATCGTTTCGCAAGC	0	0	0	0	0	0	0		51to54GGATCGTTTC: CATCTGCACCAGGATCGTTTCGCAAGC	0	0	0
51to64: AAGTTCATCTGCACCCGTGCCCTGGCC	0	0	0	0	0	0	0		51to64: AAGTTCATCTGCACCCGTGCCCTGGCC	11.699	9.46076	9.41928
51to65: AAGTTCATCTGCACCGTGCCCTGGCCC	0	0	12.7111	15.5537	0	13.4818	15.0754		51to65: AAGTTCATCTGCACCGTGCCCTGGCCC	14.4073	14.5866	13.2465
51to71: GAAGTTCATCTGCACCTGGCCCACCCT	0	0	12.0401	13.1295	14.8434	0	12.6314		51to71: GAAGTTCATCTGCACCTGGCCCACCCT	3.77713	12.773	3.60973
52to56TCTGAAGTT: TCTGCACCATCTGAAGTTCAAGCTGCC	0	0	0	12.6335	15.1068	14.5559	12.7141		52to56TCTGAAGTT: TCTGCACCATCTGAAGTTCAAGCTGCC	0	0	0
52to57: AGTTCATCTGCACCAAGCTGCCCGTGC	0	19.318	18.1128	17.8997	16.3608	18.0001	17.8802		52to57: AGTTCATCTGCACCAAGCTGCCCGTGC	18.4863	18.1322	18.2788
52to58: GTTCATCTGCACCAGCTGCCCGTGCCC	0	0	0	12.6717	0	0	0		52to58: GTTCATCTGCACCAGCTGCCCGTGCCC	2.8787	0	0
52to66: AGTTCATCTGCACCATGCCCTGGCCCA	0	0	5.38815	5.61143	0	0	0		52to66: AGTTCATCTGCACCATGCCCTGGCCCA	4.32658	3.78593	0
52to71TCTGCCCGTGCC: TGCACCATCTGCCCGTGCCTGGCCCAC	0	0	0	0	0	0	0		52to71TCTGCCCGTGCC: TGCACCATCTGCCCGTGCCTGGCCCAC	0	0	0
53CG: TCTGCACCACCCGGGCAAGCTGCCCGT	0	0	0	0	0	0	0		53CG: TCTGCACCACCCGGGCAAGCTGCCCGT	10.8285	8.00491	9.01279
53to54: CATCTGCACCACGCAAGCTGCCCGTGC	0	0	0	0	3.5921	0	0		53to54: CATCTGCACCACGCAAGCTGCCCGTGC	0	0	0
53to54ACT: CATCTGCACCACCACTGCAAGCTGCCC	0	0	0	0	0	0	0		53to54ACT: CATCTGCACCACCACTGCAAGCTGCCC	6.01232	0	0
53to54ATCT: ATCTGCACCACCATCTGCAAGCTGCCC	0	0	12.4982	0	14.6071	12.4474	14.6506		53to54ATCT: ATCTGCACCACCATCTGCAAGCTGCCC	9.01051	3.78593	13.8219
53to54T: ATCTGCACCACTGCAAGCTGCCCGTGC	0	0	0	13.4076	17.0013	14.3147	14.6878		53to54T: ATCTGCACCACTGCAAGCTGCCCGTGC	11.1563	3.78593	14.6305
53to55AAGTT: CTGCACCACCAAGTTCAAGCTGCCCGT	0	0	0	0	0	0	0		53to55AAGTT: CTGCACCACCAAGTTCAAGCTGCCCGT	3.77713	0	0
53to55ATCTGAACAGAGATAGA: CACCACCATCTGAACAGAGATAGACAA	0	0	0	0	0	0	0		53to55ATCTGAACAGAGATAGA: CACCACCATCTGAACAGAGATAGACAA	0	0	0
53to55CTGCACCACCCTGAAGTT: CACCACCCTGCACCACCCTGAAGTTCA	0	0	0	0	0	0	0		53to55CTGCACCACCCTGAAGTT: CACCACCCTGCACCACCCTGAAGTTCA	2.8787	0	0
53to55TGCAC: ATCTGCACCACCTGCACCAAGCTGCCC	0	0	0	13.2729	0	13.3228	14.3026		53to55TGCAC: ATCTGCACCACCTGCACCAAGCTGCCC	13.3797	15.2609	14.0111
53to55TGCATT: TCTGCACCACTGCATTCAAGCTGCCCG	0	0	0	0	11.8663	0	0		53to55TGCATT: TCTGCACCACTGCATTCAAGCTGCCCG	0	0	0
53to56: TCATCTGCACCACAAGCTGCCCGTGCC	0	0	0	12.7428	11.4901	0	0		53to56: TCATCTGCACCACAAGCTGCCCGTGCC	13.5275	14.9835	7.08208
53to58: TTCATCTGCACCACGCTGCCCGTGCCC	0	0	7.81912	7.90955	6.07376	8.00435	7.81928		53to58: TTCATCTGCACCACGCTGCCCGTGCCC	7.76199	8.00491	7.81478
53to66CTCGTGACCAAGC: TGCACCACCCTCGTGACCAAGCTGCCC	0	0	0	0	0	0	0		53to66CTCGTGACCAAGC: TGCACCACCCTCGTGACCAAGCTGCCC	0	0	0
54AC: CTGCACCACCGACGCAAGCTGCCCGTG	0	0	0	15.389	0	15.3597	16.5011		54AC: CTGCACCACCGACGCAAGCTGCCCGTG	6.85035	15.2852	13.3784
54CA: TCTGCACCACCGCAGCAAGCTGCCCGT	0	0	0	0	13.1407	0	0		54CA: TCTGCACCACCGCAGCAAGCTGCCCGT	0	0	0
54T: TCTGCACCACCGTGCAAGCTGCCCGTG	0	0	0	0	3.5921	0	0		54T: TCTGCACCACCGTGCAAGCTGCCCGTG	0	0	0
54TG: TCTGCACCACCGTGGCAAGCTGCCCGT	0	0	0	0	11.3504	13.3288	0		54TG: TCTGCACCACCGTGGCAAGCTGCCCGT	0	3.78593	0
54TGCACGACCCTGAAGTTCATCT: ACCGTGCACGACCCTGAAGTTCATCTG	0	0	0	0	0	0	0		54TGCACGACCCTGAAGTTCATCT: ACCGTGCACGACCCTGAAGTTCATCTG	9.68642	0	10.8966
54to54ATGCCACCTACG: CACCGATGCCACCTACGGCAAGCTGCC	0	0	0	0	0	0	0		54to54ATGCCACCTACG: CACCGATGCCACCTACGGCAAGCTGCC	0	0	3.60973
54to54CTGCCCGTG: GCACCACCGCTGCCCGTGCAAGCTGCC	0	0	12.9384	0	0	0	0		54to54CTGCCCGTG: GCACCACCGCTGCCCGTGCAAGCTGCC	11.9766	5.29942	3.60973
54to54T: ATCTGCACCACCTGCAAGCTGCCCGTG	0	0	0	0	0	0	0		54to54T: ATCTGCACCACCTGCAAGCTGCCCGTG	7.07095	6.85975	7.66349
54to54TA: CTGCACCACCGTACAAGCTGCCCGTGC	0	0	0	0	0	0	0		54to54TA: CTGCACCACCGTACAAGCTGCCCGTGC	11.5632	9.13934	9.07407
54to54TGCACCACGTTCAT: GCACCACCGTGCACCACGTTCATCAAG	0	0	0	0	0	0	0		54to54TGCACCACGTTCAT: GCACCACCGTGCACCACGTTCATCAAG	12.2736	10.0537	10.2019
54to54TGCCCTAGCA: CACCGTGCCCTAGCACAAGCTGCCCGT	0	0	0	0	0	0	0		54to54TGCCCTAGCA: CACCGTGCCCTAGCACAAGCTGCCCGT	8.97452	0	0
54to55C: ATCTGCACCACCCCAAGCTGCCCGTGC	0	0	0	2.66014	5.09502	0	0		54to55C: ATCTGCACCACCCCAAGCTGCCCGTGC	5.0345	0	0
54to56: CATCTGCACCACCAAGCTGCCCGTGCC	3.93802	0	0	0	0	0	0		54to56: CATCTGCACCACCAAGCTGCCCGTGCC	10.2615	6.28099	6.09269
54to63TGCCCTGTGCCCTGGCCCA: ACCGTGCCCTGTGCCCTGGCCCACCGT	0	0	0	0	0	0	0		54to63TGCCCTGTGCCCTGGCCCA: ACCGTGCCCTGTGCCCTGGCCCACCGT	7.4833	6.28099	6.50243
54to64: ATCTGCACCACCCGTGCCCTGGCCCAC	0	0	0	0	0	0	0		54to64: ATCTGCACCACCCGTGCCCTGGCCCAC	0	0	0
54to66: TCATCTGCACCACCATGCCCTGGCCCA	0	0	0	0	0	0	0		54to66: TCATCTGCACCACCATGCCCTGGCCCA	0	0	0
54to68: TCATCTGCACCACCACCCTGGCCCACC	0	0	0	0	0	0	0		54to68: TCATCTGCACCACCACCCTGGCCCACC	0	0	0
54to70: ATCTGCACCACCCTGGCCCACCCTCGT	0	0	0	0	0	0	0		54to70: ATCTGCACCACCCTGGCCCACCCTCGT	4.32658	0	4.5494
54to71: ATCTGCACCACCTGGCCCACCCTCGTG	0	0	0	0	0	0	0		54to71: ATCTGCACCACCTGGCCCACCCTCGTG	4.32658	0	0
54to80: ATCTGCACCACCCTCGTGACCACCCTG	0	0	0	0	12.5694	0	5.60578		54to80: ATCTGCACCACCCTCGTGACCACCCTG	0	3.78593	3.60973
54TT: ATCTGCACCACCGTTGCAAGCTGCCCG	0	0	0	14.6882	0	13.3642	12.8021		54TT: ATCTGCACCACCGTTGCAAGCTGCCCG	12.0839	14.7695	6.82118
55G: TGCACCACCGGGCAAGCTGCCCGTGCC	0	0	11.0682	11.8001	12.8725	0	0		55G: TGCACCACCGGGCAAGCTGCCCGTGCC	11.5449	4.73266	0
55to55: TCTGCACCACCGCAAGCTGCCCGTGCC	0	0	15.9868	16.5496	17.9487	16.6382	14.5309		55to55: TCTGCACCACCGCAAGCTGCCCGTGCC	12.8529	11.9065	14.9833
55to57: CATCTGCACCACCGAGCTGCCCGTGCC	0	0	0	0	0	0	0		55to57: CATCTGCACCACCGAGCTGCCCGTGCC	12.4755	14.7095	6.31206
55to57TGC: CTGCACCACCGTGCAGCTGCCCGTGCC	0	0	0	0	0	0	0		55to57TGC: CTGCACCACCGTGCAGCTGCCCGTGCC	3.77713	0	0
55to58T: TCTGCACCACCGTGCTGCCCGTGCCCT	0	0	0	0	0	0	0		55to58T: TCTGCACCACCGTGCTGCCCGTGCCCT	2.8787	0	3.60973
55to59:	0	0	5.38815	0	0	0	0		55to59:	9.94545	7.68438	7.74112
55to60: TCTGCACCACCGCTGCCCGTGCCCTGG	0	0	13.6663	15.0547	12.9602	15.0328	15.7582		55to60: TCTGCACCACCGCTGCCCGTGCCCTGG	14.4843	16.1318	10.5589
55to60TGCC: CTGCACCACCGTGCCCTGCCCGTGCCC	0	0	0	0	0	0	0		55to60TGCC: CTGCACCACCGTGCCCTGCCCGTGCCC	0	0	0
55to62: CATCTGCACCACCGCCCGTGCCCTGGC	0	0	0	0	12.4968	0	10.9884		55to62: CATCTGCACCACCGCCCGTGCCCTGGC	10.7615	0	3.60973
55to66: GTTCATCTGCACCACCGTGCCCTGGCC	11.0893	0	14.871	13.8563	13.6985	14.9575	12.9927		55to66: GTTCATCTGCACCACCGTGCCCTGGCC	13.3262	11.5907	13.1323
55to68: AGTTCATCTGCACCACCGCCCTGGCCC	0	0	0	0	0	13.0384	0		55to68: AGTTCATCTGCACCACCGCCCTGGCCC	0	0	0
56GC: TCTGCACCACCGGCGCAAGCTGCCCGT	0	0	0	11.8736	14.3545	0	12.4666		56GC: TCTGCACCACCGGCGCAAGCTGCCCGT	0	0	0
56GCCCCGCGCCACGC: CCGGCGCCCCGCGCCACGCAAGCTGCC	0	0	0	0	0	0	0		56GCCCCGCGCCACGC: CCGGCGCCCCGCGCCACGCAAGCTGCC	3.77713	0	0
56to67: CATCTGCACCACCGGGCCCTGGCCCAC	0	0	5.38815	2.66014	4.13662	5.44721	2.96605		56to67: CATCTGCACCACCGGGCCCTGGCCCAC	0	0	0
57to60: ATCTGCACCACCGGCTGCCCGTGCCCT	0	0	0	0	0	0	0		57to60: ATCTGCACCACCGGCTGCCCGTGCCCT	0	0	0
wildtype: ATCTGCACCACCGGCAAGCTGCCCGTG	19.9234	18.4021	18.856	17.8858	18.1011	17.6977	17.7699		wildtype: ATCTGCACCACCGGCAAGCTGCCCGTG	17.814	17.5705	18.5123

## Sheet: tyr raw
	nerve	vessel	bone	skin	blood	muscle	hand			limb1	limb2	limb3
21to45TGG: GAAGGTGACTGGTACTGGGACTGGAGGGACGC	0	146	0	0	0	0	0		21to45TGG: GAAGGTGACTGGTACTGGGACTGGAGGGACGC	0	0	0
21to48: GAAGGTGACTGGGACTGGAGGGACGCCCAGGG	0	509	0	297	0	6	0		21to48: GAAGGTGACTGGGACTGGAGGGACGCCCAGGG	0	0	0
22to50AGGACTTTGCA: GAAGGTGACCAGGACTTTGCAGGACTGGAGGG	0	0	0	1468	0	1540	13877		22to50AGGACTTTGCA: GAAGGTGACCAGGACTTTGCAGGACTGGAGGG	18	236	9168
23to76: GAAGGTGACCGCCGTCTGCACCGACCAGCTGA	0	0	0	0	0	0	0		23to76: GAAGGTGACCGCCGTCTGCACCGACCAGCTGA	0	0	0
24to50: AAGGTGACCGGGGACTGGAGGGACGCCCAGGG	0	0	0	0	0	0	0		24to50: AAGGTGACCGGGGACTGGAGGGACGCCCAGGG	0	0	0
26to59: AGGTGACCGGCGGGACGCCCAGGGCTGCGCCG	0	0	0	0	0	0	0		26to59: AGGTGACCGGCGGGACGCCCAGGGCTGCGCCG	0	0	0
28to47TGT: GTGACCGGCGACTGTCTGGGACTGGAGGGACG	0	0	0	0	0	0	0		28to47TGT: GTGACCGGCGACTGTCTGGGACTGGAGGGACG	1160	0	0
28to54: GTGACCGGCGACTGGAGGGACGCCCAGGGCTG	0	0	0	0	0	0	0		28to54: GTGACCGGCGACTGGAGGGACGCCCAGGGCTG	414	1154	4
29to49: TGACCGGCGACCGGGACTGGAGGGACGCCCAG	6	41	38	12	21	73	124		29to49: TGACCGGCGACCGGGACTGGAGGGACGCCCAG	34	8	26
32to70: GACCGGCGACCAGGGCTGCGCCGTCTGCACCG	12	0	0	0	0	28	12		32to70: GACCGGCGACCAGGGCTGCGCCGTCTGCACCG	4	0	6
33to46GTTC: GACCGGCGACCAGGAGTTCACTGGGACTGGAG	0	0	0	0	0	0	0		33to46GTTC: GACCGGCGACCAGGAGTTCACTGGGACTGGAG	0	0	0
33to85GACCGG: CCAGGAGACCGGCGACCAGCTGATGGGCGCCC	3	0	0	0	0	10	0		33to85GACCGG: CCAGGAGACCGGCGACCAGCTGATGGGCGCCC	0	0	0
35to49: CCGGCGACCAGGACTGGGACTGGAGGGACGCC	0	2300	42	0	0	5695	0		35to49: CCGGCGACCAGGACTGGGACTGGAGGGACGCC	356	0	354
35to55: CCGGCGACCAGGACTGGAGGGACGCCCAGGGC	15880	84512	99262	12547	46216	138040	285477		35to55: CCGGCGACCAGGACTGGAGGGACGCCCAGGGC	56740	24892	39066
37to48: GCGACCAGGACTTCTGGGACTGGAGGGACGCC	0	3387	0	0	0	33	25		37to48: GCGACCAGGACTTCTGGGACTGGAGGGACGCC	0	0	0
37to78: GGCGACCAGGACTTCGTCTGCACCGACCAGCT	0	0	0	0	0	0	0		37to78: GGCGACCAGGACTTCGTCTGCACCGACCAGCT	0	0	0
39to46AGC: GGCGACCAGGACTTCACAGCACTGGGACTGGA	0	0	0	0	0	0	0		39to46AGC: GGCGACCAGGACTTCACAGCACTGGGACTGGA	0	0	0
39to49C: CGGCGACCAGGACTTCACCGGGACTGGAGGGA	0	0	0	0	0	0	0		39to49C: CGGCGACCAGGACTTCACCGGGACTGGAGGGA	6	2	0
40to44: GCGACCAGGACTTCACTCTACTGGGACTGGAG	0	0	0	0	0	0	0		40to44: GCGACCAGGACTTCACTCTACTGGGACTGGAG	0	0	0
40to49: GCGACCAGGACTTCACTGGGACTGGAGGGACG	0	0	0	0	774	5761	610		40to49: GCGACCAGGACTTCACTGGGACTGGAGGGACG	1258	732	20
40to50: GCGACCAGGACTTCACTGGACTGGAGGGACGC	0	0	0	0	0	0	0		40to50: GCGACCAGGACTTCACTGGACTGGAGGGACGC	0	0	0
40to55: GCGACCAGGACTTCACTGGAGGGACGCCCAGG	0	0	0	0	0	0	0		40to55: GCGACCAGGACTTCACTGGAGGGACGCCCAGG	0	0	0
41to54GG: GCGACCAGGACTTCACTAGGTGGAGGGACGCC	0	0	0	0	0	0	0		41to54GG: GCGACCAGGACTTCACTAGGTGGAGGGACGCC	648	0	0
42to46TCACTTC: CAGGACTTCACTATTCACTTCACTGGGACTGG	0	0	0	0	0	0	0		42to46TCACTTC: CAGGACTTCACTATTCACTTCACTGGGACTGG	0	0	0
42to49: ACCAGGACTTCACTATGGGACTGGAGGGACGC	0	0	0	0	0	0	0		42to49: ACCAGGACTTCACTATGGGACTGGAGGGACGC	0	0	0
42to50: ACCAGGACTTCACTATGGACTGGAGGGACGCC	0	0	0	0	0	0	0		42to50: ACCAGGACTTCACTATGGACTGGAGGGACGCC	0	0	0
42to52: AGGACTTCACTATACTGGAGGGACGCCCAGGG	0	45	0	0	14	72	12		42to52: AGGACTTCACTATACTGGAGGGACGCCCAGGG	0	0	0
43ACTATC: CAGGACTTCACTATCACTATCCCCTACTGGGA	0	0	0	0	0	0	2		43ACTATC: CAGGACTTCACTATCACTATCCCCTACTGGGA	0	0	0
43to46ACTATCCCGGG: GGACTTCACTATCACTATCCCGGGACTGGGAC	0	0	0	0	0	0	0		43to46ACTATCCCGGG: GGACTTCACTATCACTATCCCGGGACTGGGAC	0	0	0
43to46ACTATTCACTTC: GGACTTCACTATCACTATTCACTTCACTGGGA	0	456	1519	0	0	0	1186		43to46ACTATTCACTTC: GGACTTCACTATCACTATTCACTTCACTGGGA	452	0	0
43to48: GGACTTCACTATCTGGGACTGGAGGGACGCCC	0	0	0	0	0	0	0		43to48: GGACTTCACTATCTGGGACTGGAGGGACGCCC	0	0	0
44to45ACTA: GACTTCACTATCCACTATACTGGGACTGGAGG	0	0	0	0	0	0	0		44to45ACTA: GACTTCACTATCCACTATACTGGGACTGGAGG	0	0	0
44to46: CAGGACTTCACTATCCACTGGGACTGGAGGGA	4269	8098	24949	0	7	16367	32050		44to46: CAGGACTTCACTATCCACTGGGACTGGAGGGA	6376	806	4238
44to46ACTTCAAT: GGACTTCACTATCCACTTCAATACTGGGACTG	0	0	0	0	0	0	0		44to46ACTTCAAT: GGACTTCACTATCCACTTCAATACTGGGACTG	0	0	0
44to48: AGGTGACCGGCGACCAGGACTTCACTATCCTG	89995	37196	11250	1244	32645	54698	32293		44to48: AGGTGACCGGCGACCAGGACTTCACTATCCTG	3180	786	2876
44to49TGGAGGACTGGAG: CTTCACTATCCTGGAGGACTGGAGGGGACTGG	0	0	0	0	0	0	0		44to49TGGAGGACTGGAG: CTTCACTATCCTGGAGGACTGGAGGGGACTGG	0	0	0
44to50T: GGACTTCACTATCCTGGACTGGAGGGACGCCC	0	0	0	0	0	0	0		44to50T: GGACTTCACTATCCTGGACTGGAGGGACGCCC	2	0	0
44to54: GGACTTCACTATCCTGGAGGGACGCCCAGGGC	14	2198	8	0	542	4893	816		44to54: GGACTTCACTATCCTGGAGGGACGCCCAGGGC	88	0	186
45to46: GGACTTCACTATCCCACTGGGACTGGAGGGAC	2	0	0	0	0	0	0		45to46: GGACTTCACTATCCCACTGGGACTGGAGGGAC	2	0	0
45to46GGG: ACTTCACTATCCCGGGACTGGGACTGGAGGGA	17879	12949	73827	1445	0	83902	40040		45to46GGG: ACTTCACTATCCCGGGACTGGGACTGGAGGGA	25430	2372	20074
45to48: GGACTTCACTATCCCTGGGACTGGAGGGACGC	27	0	1192	558	511	32	606		45to48: GGACTTCACTATCCCTGGGACTGGAGGGACGC	28	0	20
45to49: GGACTTCACTATCCCGGGACTGGAGGGACGCC	68	30	74	4	13	157	111		45to49: GGACTTCACTATCCCGGGACTGGAGGGACGCC	52	4	22
45to50GCT: GGACTTCACTATCCCGCTGGACTGGAGGGACG	0	0	0	0	0	23	3		45to50GCT: GGACTTCACTATCCCGCTGGACTGGAGGGACG	0	0	0
45to50T: GGACTTCACTATCCCTGGACTGGAGGGACGCC	13	3	0	0	0	0	0		45to50T: GGACTTCACTATCCCTGGACTGGAGGGACGCC	0	0	0
45to67: GGACTTCACTATCCCAGGGCTGCGCCGTCTGC	0	0	0	0	0	1679	0		45to67: GGACTTCACTATCCCAGGGCTGCGCCGTCTGC	0	0	0
45to78A: GGACTTCACTATCCCAGTCTGCACCGACCAGC	0	0	0	0	0	0	0		45to78A: GGACTTCACTATCCCAGTCTGCACCGACCAGC	338	0	0
46G: GGACTTCACTATCCCCGTACTGGGACTGGAGG	0	13	19	0	3	0	0		46G: GGACTTCACTATCCCCGTACTGGGACTGGAGG	74	0	14
46to46: GGACTTCACTATCCCCACTGGGACTGGAGGGA	0	0	0	0	0	0	0		46to46: GGACTTCACTATCCCCACTGGGACTGGAGGGA	2	0	2
46to46AATATC: ACTTCACTATCCCCAATATCACTGGGACTGGA	0	0	0	0	0	0	0		46to46AATATC: ACTTCACTATCCCCAATATCACTGGGACTGGA	0	0	0
46to46AGAA: ACTTCACTATCCCCAGAAACTGGGACTGGAGG	0	0	0	0	0	0	0		46to46AGAA: ACTTCACTATCCCCAGAAACTGGGACTGGAGG	0	0	4
46to46CC: ACTTCACTATCCCCCCACTGGGACTGGAGGGA	0	0	0	0	0	0	0		46to46CC: ACTTCACTATCCCCCCACTGGGACTGGAGGGA	0	0	0
46to47: GGACTTCACTATCCCCCTGGGACTGGAGGGAC	0	0	0	0	0	0	0		46to47: GGACTTCACTATCCCCCTGGGACTGGAGGGAC	0	0	0
46to49: GGACTTCACTATCCCCGGGACTGGAGGGACGC	0	0	0	0	0	0	0		46to49: GGACTTCACTATCCCCGGGACTGGAGGGACGC	0	0	0
46to49C: GGACTTCACTATCCCCCGGGACTGGAGGGACG	66	16	7	0	2	50	86		46to49C: GGACTTCACTATCCCCCGGGACTGGAGGGACG	50	4	14
47GG: GACTTCACTATCCCCTGGACTGGGACTGGAGG	6	2	4	0	0	3	0		47GG: GACTTCACTATCCCCTGGACTGGGACTGGAGG	4	0	2
47GGACTGG: CTTCACTATCCCCTGGACTGGACTGGGACTGG	0	0	0	0	0	0	0		47GGACTGG: CTTCACTATCCCCTGGACTGGACTGGGACTGG	14	0	4
47GGG: ACTTCACTATCCCCTGGGACTGGGACTGGAGG	0	826	0	0	603	32	30		47GGG: ACTTCACTATCCCCTGGGACTGGGACTGGAGG	10	0	4
47T: GGACTTCACTATCCCCTTACTGGGACTGGAGG	5570	9841	16476	1863	4197	28215	8849		47T: GGACTTCACTATCCCCTTACTGGGACTGGAGG	11506	36	3740
47to10TC: ACTTCACTATCCCCTTCACGCCCAGGGCTGCG	0	0	0	0	0	0	0		47to10TC: ACTTCACTATCCCCTTCACGCCCAGGGCTGCG	4	2	2
47to48: CTTCACTATCCCCTTGGGACTGGAGGGACGCC	0	0	0	0	0	0	0		47to48: CTTCACTATCCCCTTGGGACTGGAGGGACGCC	2828	2	152
47to49: CTTCACTATCCCCTGGGACTGGAGGGACGCCC	172896	38183	31954	6741	23698	159345	203613		47to49: CTTCACTATCCCCTGGGACTGGAGGGACGCCC	23698	5308	24320
47to49G: CTTCACTATCCCCTGGGGACTGGAGGGACGCC	0	0	0	0	0	0	0		47to49G: CTTCACTATCCCCTGGGGACTGGAGGGACGCC	0	0	0
47to50: CTTCACTATCCCCTGGACTGGAGGGACGCCCA	116042	10140	0	0	0	121599	21592		47to50: CTTCACTATCCCCTGGACTGGAGGGACGCCCA	4148	822	3300
47to50GGA: CTTCACTATCCCCTGGAGGACTGGAGGGACGC	0	0	0	0	0	0	0		47to50GGA: CTTCACTATCCCCTGGAGGACTGGAGGGACGC	0	0	0
47to52GGAT: CTTCACTATCCCCTGGATACTGGAGGGACGCC	0	0	0	0	0	0	0		47to52GGAT: CTTCACTATCCCCTGGATACTGGAGGGACGCC	2	2	0
47to53GGCGTCTGGGATAGTGAAGTC: TCCCCTGGCGTCTGGGATAGTGAAGTCCTGGG	2	149	0	0	0	2	0		47to53GGCGTCTGGGATAGTGAAGTC: TCCCCTGGCGTCTGGGATAGTGAAGTCCTGGG	2	0	0
47to53GGGATTCACTATCCC: CACTATCCCCTGGGATTCACTATCCCCTGGGA	0	0	0	0	0	0	0		47to53GGGATTCACTATCCC: CACTATCCCCTGGGATTCACTATCCCCTGGGA	0	0	0
47to55: ACTTCACTATCCCCTGGAGGGACGCCCAGGGC	14	0	0	0	8	3	0		47to55: ACTTCACTATCCCCTGGAGGGACGCCCAGGGC	6	2	2
47to55GGA: GACTTCACTATCCCCTGGAGGAGGGACGCCCA	0	0	0	0	0	0	0		47to55GGA: GACTTCACTATCCCCTGGAGGAGGGACGCCCA	0	0	0
47to58: GGACTTCACTATCCCCTGGGACGCCCAGGGCT	0	7775	1238	592	5544	1019	6617		47to58: GGACTTCACTATCCCCTGGGACGCCCAGGGCT	0	0	736
47to58GGAGGGACGCCC: TCACTATCCCCTGGAGGGACGCCCAGGGACGC	1429	0	0	0	983	290	11		47to58GGAGGGACGCCC: TCACTATCCCCTGGAGGGACGCCCAGGGACGC	0	0	102
47to60GGATA: ACTTCACTATCCCCTGGATAGACGCCCAGGGC	0	0	0	0	0	0	0		47to60GGATA: ACTTCACTATCCCCTGGATAGACGCCCAGGGC	0	0	0
47to61GGA: ACTTCACTATCCCCTGGAACGCCCAGGGCTGC	0	0	0	0	0	0	0		47to61GGA: ACTTCACTATCCCCTGGAACGCCCAGGGCTGC	0	0	0
48TCACTATA: TCACTATCCCCTATCACTATACTGGGACTGGA	0	0	0	0	0	0	0		48TCACTATA: TCACTATCCCCTATCACTATACTGGGACTGGA	0	0	0
wt: GGCGACCAGGACTTCACTATCCCCTACTGGGA	195026	117659	75801	17325	54023	145304	259222		wt: GGCGACCAGGACTTCACTATCCCCTACTGGGA	44646	19778	51858
	619219	336474	337660	44096	169804	768871	907264
	0.314955	0.349682	0.224489	0.392893	0.318149	0.188984	0.285718
	1.61494	2.972	2.96156	22.6778	5.88914	1.30061	1.10222

## Sheet: tyr normalized
	nerve	vessel	bone	skin	blood	muscle	hand			limb1	limb2	limb3
21to45TGG: GAAGGTGACTGGTACTGGGACTGGAGGGACGC	0	433.912	0	0	0	0	0		21to45TGG: GAAGGTGACTGGTACTGGGACTGGAGGGACGC	0	0	0
21to48: GAAGGTGACTGGGACTGGAGGGACGCCCAGGG	0	1512.75	0	6735.3	0	7.80365	0		21to48: GAAGGTGACTGGGACTGGAGGGACGCCCAGGG	0	0	0
22to50AGGACTTTGCA: GAAGGTGACCAGGACTTTGCAGGACTGGAGGG	0	0	0	33291	0	2002.94	15295.4		22to50AGGACTTTGCA: GAAGGTGACCAGGACTTTGCAGGACTGGAGGG	98.0349	4144.13	57187.1
23to76: GAAGGTGACCGCCGTCTGCACCGACCAGCTGA	0	0	0	0	0	0	0		23to76: GAAGGTGACCGCCGTCTGCACCGACCAGCTGA	0	0	0
24to50: AAGGTGACCGGGGACTGGAGGGACGCCCAGGG	0	0	0	0	0	0	0		24to50: AAGGTGACCGGGGACTGGAGGGACGCCCAGGG	0	0	0
26to59: AGGTGACCGGCGGGACGCCCAGGGCTGCGCCG	0	0	0	0	0	0	0		26to59: AGGTGACCGGCGGGACGCCCAGGGCTGCGCCG	0	0	0
28to47TGT: GTGACCGGCGACTGTCTGGGACTGGAGGGACG	0	0	0	0	0	0	0		28to47TGT: GTGACCGGCGACTGTCTGGGACTGGAGGGACG	6317.81	0	0
28to54: GTGACCGGCGACTGGAGGGACGCCCAGGGCTG	0	0	0	0	0	0	0		28to54: GTGACCGGCGACTGGAGGGACGCCCAGGGCTG	2254.8	20264.1	24.9507
29to49: TGACCGGCGACCGGGACTGGAGGGACGCCCAG	9.68963	121.852	112.539	272.134	123.672	94.9444	136.675		29to49: TGACCGGCGACCGGGACTGGAGGGACGCCCAG	185.177	140.479	162.18
32to70: GACCGGCGACCAGGGCTGCGCCGTCTGCACCG	19.3793	0	0	0	0	36.417	13.2266		32to70: GACCGGCGACCAGGGCTGCGCCGTCTGCACCG	21.7855	0	37.4261
33to46GTTC: GACCGGCGACCAGGAGTTCACTGGGACTGGAG	0	0	0	0	0	0	0		33to46GTTC: GACCGGCGACCAGGAGTTCACTGGGACTGGAG	0	0	0
33to85GACCGG: CCAGGAGACCGGCGACCAGCTGATGGGCGCCC	4.84481	0	0	0	0	13.0061	0		33to85GACCGG: CCAGGAGACCGGCGACCAGCTGATGGGCGCCC	0	0	0
35to49: CCGGCGACCAGGACTGGGACTGGAGGGACGCC	0	6835.6	124.385	0	0	7406.96	0		35to49: CCGGCGACCAGGACTGGGACTGGAGGGACGCC	1938.91	0	2208.14
35to55: CCGGCGACCAGGACTGGAGGGACGCCCAGGGC	25645.2	251169	293970	284538	272173	179536	314657		35to55: CCGGCGACCAGGACTGGAGGGACGCCCAGGGC	309028	437101	243681
37to48: GCGACCAGGACTTCTGGGACTGGAGGGACGCC	0	10066.2	0	0	0	42.9201	27.5554		37to48: GCGACCAGGACTTCTGGGACTGGAGGGACGCC	0	0	0
37to78: GGCGACCAGGACTTCGTCTGCACCGACCAGCT	0	0	0	0	0	0	0		37to78: GGCGACCAGGACTTCGTCTGCACCGACCAGCT	0	0	0
39to46AGC: GGCGACCAGGACTTCACAGCACTGGGACTGGA	0	0	0	0	0	0	0		39to46AGC: GGCGACCAGGACTTCACAGCACTGGGACTGGA	0	0	0
39to49C: CGGCGACCAGGACTTCACCGGGACTGGAGGGA	0	0	0	0	0	0	0		39to49C: CGGCGACCAGGACTTCACCGGGACTGGAGGGA	32.6783	35.1198	0
40to44: GCGACCAGGACTTCACTCTACTGGGACTGGAG	0	0	0	0	0	0	0		40to44: GCGACCAGGACTTCACTCTACTGGGACTGGAG	0	0	0
40to49: GCGACCAGGACTTCACTGGGACTGGAGGGACG	0	0	0	0	4558.2	7492.8	672.351		40to49: GCGACCAGGACTTCACTGGGACTGGAGGGACG	6851.55	12853.8	124.754
40to50: GCGACCAGGACTTCACTGGACTGGAGGGACGC	0	0	0	0	0	0	0		40to50: GCGACCAGGACTTCACTGGACTGGAGGGACGC	0	0	0
40to55: GCGACCAGGACTTCACTGGAGGGACGCCCAGG	0	0	0	0	0	0	0		40to55: GCGACCAGGACTTCACTGGAGGGACGCCCAGG	0	0	0
41to54GG: GCGACCAGGACTTCACTAGGTGGAGGGACGCC	0	0	0	0	0	0	0		41to54GG: GCGACCAGGACTTCACTAGGTGGAGGGACGCC	3529.26	0	0
42to46TCACTTC: CAGGACTTCACTATTCACTTCACTGGGACTGG	0	0	0	0	0	0	0		42to46TCACTTC: CAGGACTTCACTATTCACTTCACTGGGACTGG	0	0	0
42to49: ACCAGGACTTCACTATGGGACTGGAGGGACGC	0	0	0	0	0	0	0		42to49: ACCAGGACTTCACTATGGGACTGGAGGGACGC	0	0	0
42to50: ACCAGGACTTCACTATGGACTGGAGGGACGCC	0	0	0	0	0	0	0		42to50: ACCAGGACTTCACTATGGACTGGAGGGACGCC	0	0	0
42to52: AGGACTTCACTATACTGGAGGGACGCCCAGGG	0	133.74	0	0	82.448	93.6438	13.2266		42to52: AGGACTTCACTATACTGGAGGGACGCCCAGGG	0	0	0
43ACTATC: CAGGACTTCACTATCACTATCCCCTACTGGGA	0	0	0	0	0	0	2.20443		43ACTATC: CAGGACTTCACTATCACTATCCCCTACTGGGA	0	0	0
43to46ACTATCCCGGG: GGACTTCACTATCACTATCCCGGGACTGGGAC	0	0	0	0	0	0	0		43to46ACTATCCCGGG: GGACTTCACTATCACTATCCCGGGACTGGGAC	0	0	0
43to46ACTATTCACTTC: GGACTTCACTATCACTATTCACTTCACTGGGA	0	1355.23	4498.61	0	0	0	1307.23		43to46ACTATTCACTTC: GGACTTCACTATCACTATTCACTTCACTGGGA	2461.77	0	0
43to48: GGACTTCACTATCTGGGACTGGAGGGACGCCC	0	0	0	0	0	0	0		43to48: GGACTTCACTATCTGGGACTGGAGGGACGCCC	0	0	0
44to45ACTA: GACTTCACTATCCACTATACTGGGACTGGAGG	0	0	0	0	0	0	0		44to45ACTA: GACTTCACTATCCACTATACTGGGACTGGAGG	10.8928	0	0
44to46: CAGGACTTCACTATCCACTGGGACTGGAGGGA	6894.17	24067.2	73887.9	0	41.224	21287.1	35326		44to46: CAGGACTTCACTATCCACTGGGACTGGAGGGA	34726.2	14153.3	26435.3
44to46ACTTCAAT: GGACTTCACTATCCACTTCAATACTGGGACTG	0	0	0	0	0	0	0		44to46ACTTCAAT: GGACTTCACTATCCACTTCAATACTGGGACTG	0	0	0
44to48: AGGTGACCGGCGACCAGGACTTCACTATCCTG	145336	110546	33317.5	28211.2	192251	71140.7	35593.8		44to48: AGGTGACCGGCGACCAGGACTTCACTATCCTG	17319.5	13802.1	17939.6
44to49TGGAGGACTGGAG: CTTCACTATCCTGGAGGACTGGAGGGGACTGG	0	0	0	0	0	0	0		44to49TGGAGGACTGGAG: CTTCACTATCCTGGAGGACTGGAGGGGACTGG	0	0	0
44to50T: GGACTTCACTATCCTGGACTGGAGGGACGCCC	0	0	0	0	0	0	0		44to50T: GGACTTCACTATCCTGGACTGGAGGGACGCCC	10.8928	0	0
44to54: GGACTTCACTATCCTGGAGGGACGCCCAGGGC	22.6091	6532.45	23.6925	0	3191.92	6363.88	899.407		44to54: GGACTTCACTATCCTGGAGGGACGCCCAGGGC	479.282	0	1160.21
45to46: GGACTTCACTATCCCACTGGGACTGGAGGGAC	3.22988	0	0	0	0	0	0		45to46: GGACTTCACTATCCCACTGGGACTGGAGGGAC	10.8928	0	0
45to46GGG: ACTTCACTATCCCGGGACTGGGACTGGAGGGA	28873.5	38484.4	218643	32769.4	0	109124	44132.7		45to46GGG: ACTTCACTATCCCGGGACTGGGACTGGAGGGA	138502	41652	125215
45to48: GGACTTCACTATCCCTGGGACTGGAGGGACGC	43.6033	0	3530.18	12654.2	3009.35	41.6195	667.942		45to48: GGACTTCACTATCCCTGGGACTGGAGGGACGC	152.499	0	124.754
45to49: GGACTTCACTATCCCGGGACTGGAGGGACGCC	109.816	89.1599	219.155	90.7112	76.5589	204.196	122.346		45to49: GGACTTCACTATCCCGGGACTGGAGGGACGCC	283.212	70.2395	137.229
45to50GCT: GGACTTCACTATCCCGCTGGACTGGAGGGACG	0	0	0	0	0	29.914	3.30665		45to50GCT: GGACTTCACTATCCCGCTGGACTGGAGGGACG	0	0	0
45to50T: GGACTTCACTATCCCTGGACTGGAGGGACGCC	20.9942	8.91599	0	0	0	0	0		45to50T: GGACTTCACTATCCCTGGACTGGAGGGACGCC	0	0	0
45to67: GGACTTCACTATCCCAGGGCTGCGCCGTCTGC	0	0	0	0	0	2183.72	0		45to67: GGACTTCACTATCCCAGGGCTGCGCCGTCTGC	0	0	0
45to78A: GGACTTCACTATCCCAGTCTGCACCGACCAGC	0	0	0	0	0	0	0		45to78A: GGACTTCACTATCCCAGTCTGCACCGACCAGC	1840.88	0	0
46G: GGACTTCACTATCCCCGTACTGGGACTGGAGG	0	38.636	56.2696	0	17.6674	0	0		46G: GGACTTCACTATCCCCGTACTGGGACTGGAGG	403.033	0	87.3275
46to46: GGACTTCACTATCCCCACTGGGACTGGAGGGA	0	0	0	0	0	0	0		46to46: GGACTTCACTATCCCCACTGGGACTGGAGGGA	10.8928	0	12.4754
46to46AATATC: ACTTCACTATCCCCAATATCACTGGGACTGGA	0	0	0	0	0	0	0		46to46AATATC: ACTTCACTATCCCCAATATCACTGGGACTGGA	0	0	0
46to46AGAA: ACTTCACTATCCCCAGAAACTGGGACTGGAGG	0	0	0	0	0	0	0		46to46AGAA: ACTTCACTATCCCCAGAAACTGGGACTGGAGG	0	0	24.9507
46to46CC: ACTTCACTATCCCCCCACTGGGACTGGAGGGA	0	0	0	0	0	0	0		46to46CC: ACTTCACTATCCCCCCACTGGGACTGGAGGGA	0	0	0
46to47: GGACTTCACTATCCCCCTGGGACTGGAGGGAC	0	0	0	0	0	0	0		46to47: GGACTTCACTATCCCCCTGGGACTGGAGGGAC	0	0	0
46to49: GGACTTCACTATCCCCGGGACTGGAGGGACGC	0	0	0	0	0	0	0		46to49: GGACTTCACTATCCCCGGGACTGGAGGGACGC	141.606	0	0
46to49C: GGACTTCACTATCCCCCGGGACTGGAGGGACG	106.586	47.552	20.7309	0	11.7783	65.0304	94.7905		46to49C: GGACTTCACTATCCCCCGGGACTGGAGGGACG	272.319	70.2395	87.3275
47GG: GACTTCACTATCCCCTGGACTGGGACTGGAGG	9.68963	5.944	11.8462	0	0	3.90182	0		47GG: GACTTCACTATCCCCTGGACTGGGACTGGAGG	21.7855	0	12.4754
47GGACTGG: CTTCACTATCCCCTGGACTGGACTGGGACTGG	0	0	0	0	0	0	0		47GGACTGG: CTTCACTATCCCCTGGACTGGACTGGGACTGG	76.2494	0	24.9507
47GGG: ACTTCACTATCCCCTGGGACTGGGACTGGAGG	0	2454.87	0	0	3551.15	41.6195	33.0665		47GGG: ACTTCACTATCCCCTGGGACTGGGACTGGAGG	54.4639	0	24.9507
47T: GGACTTCACTATCCCCTTACTGGGACTGGAGG	8995.2	29247.4	48794.6	42248.7	24716.7	36696.7	9753.5		47T: GGACTTCACTATCCCCTTACTGGGACTGGAGG	62666.1	632.156	23328.9
47to10TC: ACTTCACTATCCCCTTCACGCCCAGGGCTGCG	0	0	0	0	0	0	0		47to10TC: ACTTCACTATCCCCTTCACGCCCAGGGCTGCG	21.7855	35.1198	12.4754
47to48: CTTCACTATCCCCTTGGGACTGGAGGGACGCC	0	0	0	0	0	0	0		47to48: CTTCACTATCCCCTTGGGACTGGAGGGACGCC	15402.4	35.1198	948.127
47to49: CTTCACTATCCCCTGGGACTGGAGGGACGCCC	279216	113480	94633.7	152871	139561	207245	224425		47to49: CTTCACTATCCCCTGGGACTGGAGGGACGCCC	129068	93207.8	151700
47to49G: CTTCACTATCCCCTGGGGACTGGAGGGACGCC	0	0	0	0	0	0	0		47to49G: CTTCACTATCCCCTGGGGACTGGAGGGACGCC	0	0	0
47to50: CTTCACTATCCCCTGGACTGGAGGGACGCCCA	187401	30136.1	0	0	0	158153	23799		47to50: CTTCACTATCCCCTGGACTGGAGGGACGCCCA	22591.6	14434.2	20584.3
47to50GGA: CTTCACTATCCCCTGGAGGACTGGAGGGACGC	0	0	0	0	0	0	0		47to50GGA: CTTCACTATCCCCTGGAGGACTGGAGGGACGC	0	0	0
47to52GGAT: CTTCACTATCCCCTGGATACTGGAGGGACGCC	0	0	0	0	0	0	0		47to52GGAT: CTTCACTATCCCCTGGATACTGGAGGGACGCC	10.8928	35.1198	0
47to53GGCGTCTGGGATAGTGAAGTC: TCCCCTGGCGTCTGGGATAGTGAAGTCCTGGG	3.22988	442.828	0	0	0	2.60122	0		47to53GGCGTCTGGGATAGTGAAGTC: TCCCCTGGCGTCTGGGATAGTGAAGTCCTGGG	10.8928	0	0
47to53GGGATTCACTATCCC: CACTATCCCCTGGGATTCACTATCCCCTGGGA	0	0	0	0	0	0	0		47to53GGGATTCACTATCCC: CACTATCCCCTGGGATTCACTATCCCCTGGGA	0	0	0
47to55: ACTTCACTATCCCCTGGAGGGACGCCCAGGGC	22.6091	0	0	0	47.1131	3.90182	0		47to55: ACTTCACTATCCCCTGGAGGGACGCCCAGGGC	32.6783	35.1198	12.4754
47to55GGA: GACTTCACTATCCCCTGGAGGAGGGACGCCCA	0	0	0	0	0	0	0		47to55GGA: GACTTCACTATCCCCTGGAGGAGGGACGCCCA	0	0	0
47to58: GGACTTCACTATCCCCTGGGACGCCCAGGGCT	0	23107.3	3666.41	13425.3	32649.4	1325.32	7293.36		47to58: GGACTTCACTATCCCCTGGGACGCCCAGGGCT	0	0	4590.93
47to58GGAGGGACGCCC: TCACTATCCCCTGGAGGGACGCCCAGGGACGC	2307.75	0	0	0	5789.03	377.176	12.1244		47to58GGAGGGACGCCC: TCACTATCCCCTGGAGGGACGCCCAGGGACGC	0	0	636.243
47to60GGATA: ACTTCACTATCCCCTGGATAGACGCCCAGGGC	0	0	0	0	0	0	0		47to60GGATA: ACTTCACTATCCCCTGGATAGACGCCCAGGGC	0	0	0
47to61GGA: ACTTCACTATCCCCTGGAACGCCCAGGGCTGC	0	0	0	0	0	0	0		47to61GGA: ACTTCACTATCCCCTGGAACGCCCAGGGCTGC	0	0	0
48TCACTATA: TCACTATCCCCTATCACTATACTGGGACTGGA	0	0	0	0	0	0	0		48TCACTATA: TCACTATCCCCTATCACTATACTGGGACTGGA	0	0	0
wt: GGCGACCAGGACTTCACTATCCCCTACTGGGA	314955	349682	224489	392893	318149	188984	285718		wt: GGCGACCAGGACTTCACTATCCCCTACTGGGA	243159	347299	323474

## Sheet: tyr log
	nerve	vessel	bone	skin	blood	muscle	hand			limb1	limb2	limb3
21to45TGG: GAAGGTGACTGGTACTGGGACTGGAGGGACGC	0	8.76458	0	0	0	0	0		21to45TGG: GAAGGTGACTGGTACTGGGACTGGAGGGACGC	0	0	0
21to48: GAAGGTGACTGGGACTGGAGGGACGCCCAGGG	0	10.5639	0	12.7177	0	3.1381	0		21to48: GAAGGTGACTGGGACTGGAGGGACGCCCAGGG	0	0	0
22to50AGGACTTTGCA: GAAGGTGACCAGGACTTTGCAGGACTGGAGGG	0	0	0	15.0229	0	10.9686	13.9009		22to50AGGACTTTGCA: GAAGGTGACCAGGACTTTGCAGGACTGGAGGG	6.62987	12.0172	15.8034
23to76: GAAGGTGACCGCCGTCTGCACCGACCAGCTGA	0	0	0	0	0	0	0		23to76: GAAGGTGACCGCCGTCTGCACCGACCAGCTGA	0	0	0
24to50: AAGGTGACCGGGGACTGGAGGGACGCCCAGGG	0	0	0	0	0	0	0		24to50: AAGGTGACCGGGGACTGGAGGGACGCCCAGGG	0	0	0
26to59: AGGTGACCGGCGGGACGCCCAGGGCTGCGCCG	0	0	0	0	0	0	0		26to59: AGGTGACCGGCGGGACGCCCAGGGCTGCGCCG	0	0	0
28to47TGT: GTGACCGGCGACTGTCTGGGACTGGAGGGACG	0	0	0	0	0	0	0		28to47TGT: GTGACCGGCGACTGTCTGGGACTGGAGGGACG	12.6254	0	0
28to54: GTGACCGGCGACTGGAGGGACGCCCAGGGCTG	0	0	0	0	0	0	0		28to54: GTGACCGGCGACTGGAGGGACGCCCAGGGCTG	11.1394	14.3067	4.6977
29to49: TGACCGGCGACCGGGACTGGAGGGACGCCCAG	3.41814	6.94078	6.82705	8.09346	6.96199	6.58413	7.10512		29to49: TGACCGGCGACCGGGACTGGAGGGACGCCCAG	7.54053	7.14444	7.35032
32to70: GACCGGCGACCAGGGCTGCGCCGTCTGCACCG	4.34903	0	0	0	0	5.22562	3.83052		32to70: GACCGGCGACCAGGGCTGCGCCGTCTGCACCG	4.51005	0	5.26401
33to46GTTC: GACCGGCGACCAGGAGTTCACTGGGACTGGAG	0	0	0	0	0	0	0		33to46GTTC: GACCGGCGACCAGGAGTTCACTGGGACTGGAG	0	0	0
33to85GACCGG: CCAGGAGACCGGCGACCAGCTGATGGGCGCCC	2.54716	0	0	0	0	3.80798	0		33to85GACCGG: CCAGGAGACCGGCGACCAGCTGATGGGCGCCC	0	0	0
35to49: CCGGCGACCAGGACTGGGACTGGAGGGACGCC	0	12.7391	6.97023	0	0	12.8549	0		35to49: CCGGCGACCAGGACTGGGACTGGAGGGACGCC	10.9218	0	11.1093
35to55: CCGGCGACCAGGACTGGAGGGACGCCCAGGGC	14.6465	17.9383	18.1653	18.1183	18.0542	17.4539	18.2634		35to55: CCGGCGACCAGGACTGGAGGGACGCCCAGGGC	18.2374	18.7376	17.8946
37to48: GCGACCAGGACTTCTGGGACTGGAGGGACGCC	0	13.2974	0	0	0	5.45681	4.83569		37to48: GCGACCAGGACTTCTGGGACTGGAGGGACGCC	0	0	0
37to78: GGCGACCAGGACTTCGTCTGCACCGACCAGCT	0	0	0	0	0	0	0		37to78: GGCGACCAGGACTTCGTCTGCACCGACCAGCT	0	0	0
39to46AGC: GGCGACCAGGACTTCACAGCACTGGGACTGGA	0	0	0	0	0	0	0		39to46AGC: GGCGACCAGGACTTCACAGCACTGGGACTGGA	0	0	0
39to49C: CGGCGACCAGGACTTCACCGGGACTGGAGGGA	0	0	0	0	0	0	0		39to49C: CGGCGACCAGGACTTCACCGGGACTGGAGGGA	5.07375	5.17472	0
40to44: GCGACCAGGACTTCACTCTACTGGGACTGGAG	0	0	0	0	0	0	0		40to44: GCGACCAGGACTTCACTCTACTGGGACTGGAG	0	0	0
40to49: GCGACCAGGACTTCACTGGGACTGGAGGGACG	0	0	0	0	12.1546	12.8715	9.39522		40to49: GCGACCAGGACTTCACTGGGACTGGAGGGACG	12.7424	13.65	6.97446
40to50: GCGACCAGGACTTCACTGGACTGGAGGGACGC	0	0	0	0	0	0	0		40to50: GCGACCAGGACTTCACTGGACTGGAGGGACGC	0	0	0
40to55: GCGACCAGGACTTCACTGGAGGGACGCCCAGG	0	0	0	0	0	0	0		40to55: GCGACCAGGACTTCACTGGAGGGACGCCCAGG	0	0	0
41to54GG: GCGACCAGGACTTCACTAGGTGGAGGGACGCC	0	0	0	0	0	0	0		41to54GG: GCGACCAGGACTTCACTAGGTGGAGGGACGCC	11.7856	0	0
42to46TCACTTC: CAGGACTTCACTATTCACTTCACTGGGACTGG	0	0	0	0	0	0	0		42to46TCACTTC: CAGGACTTCACTATTCACTTCACTGGGACTGG	0	0	0
42to49: ACCAGGACTTCACTATGGGACTGGAGGGACGC	0	0	0	0	0	0	0		42to49: ACCAGGACTTCACTATGGGACTGGAGGGACGC	0	0	0
42to50: ACCAGGACTTCACTATGGACTGGAGGGACGCC	0	0	0	0	0	0	0		42to50: ACCAGGACTTCACTATGGACTGGAGGGACGCC	0	0	0
42to52: AGGACTTCACTATACTGGAGGGACGCCCAGGG	0	0	0	0	0	0	0		42to52: AGGACTTCACTATACTGGAGGGACGCCCAGGG	0	0	0
43ACTATC: CAGGACTTCACTATCACTATCCCCTACTGGGA	0	0	0	0	0	0	1.68007		43ACTATC: CAGGACTTCACTATCACTATCCCCTACTGGGA	0	0	0
43to46ACTATCCCGGG: GGACTTCACTATCACTATCCCGGGACTGGGAC	0	0	0	0	0	0	0		43to46ACTATCCCGGG: GGACTTCACTATCACTATCCCGGGACTGGGAC	0	0	0
43to46ACTATTCACTTC: GGACTTCACTATCACTATTCACTTCACTGGGA	0	10.4054	12.1356	0	0	0	10.3534		43to46ACTATTCACTTC: GGACTTCACTATCACTATTCACTTCACTGGGA	11.2661	0	0
43to48: GGACTTCACTATCTGGGACTGGAGGGACGCCC	0	0	0	0	0	0	0		43to48: GGACTTCACTATCTGGGACTGGAGGGACGCCC	0	0	0
44to45ACTA: GACTTCACTATCCACTATACTGGGACTGGAGG	0	0	0	0	0	0	0		44to45ACTA: GACTTCACTATCCACTATACTGGGACTGGAGG	3.57201	0	0
44to46: CAGGACTTCACTATCCACTGGGACTGGAGGGA	12.7514	14.5548	16.1731	0	5.39999	14.3778	15.1085		44to46: CAGGACTTCACTATCCACTGGGACTGGAGGGA	15.0838	13.7889	14.6902
44to46ACTTCAAT: GGACTTCACTATCCACTTCAATACTGGGACTG	0	0	0	0	0	0	0		44to46ACTTCAAT: GGACTTCACTATCCACTTCAATACTGGGACTG	0	0	0
44to48: AGGTGACCGGCGACCAGGACTTCACTATCCTG	17.149	16.7543	15.024	14.784	17.5526	16.1184	15.1194		44to48: AGGTGACCGGCGACCAGGACTTCACTATCCTG	14.0802	13.7527	14.1309
44to49TGGAGGACTGGAG: CTTCACTATCCTGGAGGACTGGAGGGGACTGG	0	0	0	0	0	0	0		44to49TGGAGGACTGGAG: CTTCACTATCCTGGAGGACTGGAGGGGACTGG	0	0	0
44to50T: GGACTTCACTATCCTGGACTGGAGGGACGCCC	0	0	0	0	0	0	0		44to50T: GGACTTCACTATCCTGGACTGGAGGGACGCCC	3.57201	0	0
44to54: GGACTTCACTATCCTGGAGGGACGCCCAGGGC	4.56127	12.6736	4.626	0	11.6407	12.6359	9.81443		44to54: GGACTTCACTATCCTGGAGGGACGCCCAGGGC	8.90774	0	10.1814
45to46: GGACTTCACTATCCCACTGGGACTGGAGGGAC	2.08062	0	0	0	0	0	0		45to46: GGACTTCACTATCCCACTGGGACTGGAGGGAC	3.57201	0	0
45to46GGG: ACTTCACTATCCCGGGACTGGGACTGGAGGGA	14.8175	15.232	17.7382	15.0001	0	16.7356	15.4296		45to46GGG: ACTTCACTATCCCGGGACTGGGACTGGAGGGA	17.0796	15.3461	16.9341
45to48: GGACTTCACTATCCCTGGGACTGGAGGGACGC	5.47908	0	11.7859	13.6274	11.5557	5.41344	9.38574		45to48: GGACTTCACTATCCCTGGGACTGGAGGGACGC	7.26208	0	6.97446
45to49: GGACTTCACTATCCCGGGACTGGAGGGACGCC	6.79202	6.49441	7.78238	6.51903	6.27722	7.68086	6.94657		45to49: GGACTTCACTATCCCGGGACTGGAGGGACGCC	8.15082	6.15461	7.11092
45to50GCT: GGACTTCACTATCCCGCTGGACTGGAGGGACG	0	0	0	0	0	0	0		45to50GCT: GGACTTCACTATCCCGCTGGACTGGAGGGACG	0	0	0
45to50T: GGACTTCACTATCCCTGGACTGGAGGGACGCC	4.45905	3.30976	0	0	0	0	0		45to50T: GGACTTCACTATCCCTGGACTGGAGGGACGCC	0	0	0
45to67: GGACTTCACTATCCCAGGGCTGCGCCGTCTGC	0	0	0	0	0	0	0		45to67: GGACTTCACTATCCCAGGGCTGCGCCGTCTGC	0	0	0
45to78A: GGACTTCACTATCCCAGTCTGCACCGACCAGC	0	0	0	0	0	0	0		45to78A: GGACTTCACTATCCCAGTCTGCACCGACCAGC	10.847	0	0
46G: GGACTTCACTATCCCCGTACTGGGACTGGAGG	0	5.30874	5.8397	0	4.22245	0	0		46G: GGACTTCACTATCCCCGTACTGGGACTGGAGG	8.65833	0	6.46479
46to46: GGACTTCACTATCCCCACTGGGACTGGAGGGA	0	0	0	0	0	0	0		46to46: GGACTTCACTATCCCCACTGGGACTGGAGGGA	3.57201	0	3.75225
46to46AATATC: ACTTCACTATCCCCAATATCACTGGGACTGGA	0	0	0	0	0	0	0		46to46AATATC: ACTTCACTATCCCCAATATCACTGGGACTGGA	0	0	0
46to46AGAA: ACTTCACTATCCCCAGAAACTGGGACTGGAGG	0	0	0	0	0	0	0		46to46AGAA: ACTTCACTATCCCCAGAAACTGGGACTGGAGG	0	0	4.6977
46to46CC: ACTTCACTATCCCCCCACTGGGACTGGAGGGA	0	0	0	0	0	0	0		46to46CC: ACTTCACTATCCCCCCACTGGGACTGGAGGGA	0	0	0
46to47: GGACTTCACTATCCCCCTGGGACTGGAGGGAC	0	0	0	0	0	0	0		46to47: GGACTTCACTATCCCCCTGGGACTGGAGGGAC	0	0	0
46to49: GGACTTCACTATCCCCGGGACTGGAGGGACGC	0	0	0	0	0	0	0		46to49: GGACTTCACTATCCCCGGGACTGGAGGGACGC	7.15589	0	0
46to49C: GGACTTCACTATCCCCCGGGACTGGAGGGACG	6.74934	5.60146	4.44168	0	3.67562	6.04506	6.58181		46to49C: GGACTTCACTATCCCCCGGGACTGGAGGGACG	8.09444	6.15461	6.46479
47GG: GACTTCACTATCCCCTGGACTGGGACTGGAGG	3.41814	2.79577	3.68327	0	0	2.29332	0		47GG: GACTTCACTATCCCCTGGACTGGGACTGGAGG	4.51005	0	3.75225
47GGACTGG: CTTCACTATCCCCTGGACTGGACTGGGACTGG	0	0	0	0	0	0	0		47GGACTGG: CTTCACTATCCCCTGGACTGGACTGGGACTGG	6.27145	0	4.6977
47GGG: ACTTCACTATCCCCTGGGACTGGGACTGGAGG	0	11.262	0	0	11.7945	5.41344	5.09028		47GGG: ACTTCACTATCCCCTGGGACTGGGACTGGAGG	5.79348	0	4.6977
47T: GGACTTCACTATCCCCTTACTGGGACTGGAGG	13.1351	14.8361	15.5745	15.3667	14.5933	15.1634	13.2519		47T: GGACTTCACTATCCCCTTACTGGGACTGGAGG	15.9354	9.30642	14.5099
47to10TC: ACTTCACTATCCCCTTCACGCCCAGGGCTGCG	0	0	0	0	0	0	0		47to10TC: ACTTCACTATCCCCTTCACGCCCAGGGCTGCG	4.51005	5.17472	3.75225
47to48: CTTCACTATCCCCTTGGGACTGGAGGGACGCC	0	0	0	0	0	0	0		47to48: CTTCACTATCCCCTTGGGACTGGAGGGACGCC	13.911	5.17472	9.89046
47to49: CTTCACTATCCCCTGGGACTGGAGGGACGCCC	18.091	16.7921	16.5301	17.222	17.0905	17.661	17.7759		47to49: CTTCACTATCCCCTGGGACTGGAGGGACGCCC	16.9778	16.5082	17.2109
47to49G: CTTCACTATCCCCTGGGGACTGGAGGGACGCC	0	0	0	0	0	0	0		47to49G: CTTCACTATCCCCTGGGGACTGGAGGGACGCC	0	0	0
47to50: CTTCACTATCCCCTGGACTGGAGGGACGCCCA	17.5158	14.8793	0	0	0	17.271	14.5387		47to50: CTTCACTATCCCCTGGACTGGAGGGACGCCCA	14.4636	13.8173	14.3293
47to50GGA: CTTCACTATCCCCTGGAGGACTGGAGGGACGC	0	0	0	0	0	0	0		47to50GGA: CTTCACTATCCCCTGGAGGACTGGAGGGACGC	0	0	0
47to52GGAT: CTTCACTATCCCCTGGATACTGGAGGGACGCC	0	0	0	0	0	0	0		47to52GGAT: CTTCACTATCCCCTGGATACTGGAGGGACGCC	3.57201	5.17472	0
47to53GGCGTCTGGGATAGTGAAGTC: TCCCCTGGCGTCTGGGATAGTGAAGTCCTGGG	2.08062	8.79386	0	0	0	1.84848	0		47to53GGCGTCTGGGATAGTGAAGTC: TCCCCTGGCGTCTGGGATAGTGAAGTCCTGGG	3.57201	0	0
47to53GGGATTCACTATCCC: CACTATCCCCTGGGATTCACTATCCCCTGGGA	0	0	0	0	0	0	0		47to53GGGATTCACTATCCC: CACTATCCCCTGGGATTCACTATCCCCTGGGA	0	0	0
47to55: ACTTCACTATCCCCTGGAGGGACGCCCAGGGC	4.56127	0	0	0	5.58836	2.29332	0		47to55: ACTTCACTATCCCCTGGAGGGACGCCCAGGGC	5.07375	5.17472	3.75225
47to55GGA: GACTTCACTATCCCCTGGAGGAGGGACGCCCA	0	0	0	0	0	0	0		47to55GGA: GACTTCACTATCCCCTGGAGGAGGGACGCCCA	0	0	0
47to58: GGACTTCACTATCCCCTGGGACGCCCAGGGCT	0	14.4961	11.8405	13.7128	14.9948	10.3732	12.8326		47to58: GGACTTCACTATCCCCTGGGACGCCCAGGGCT	0	0	12.1649
47to58GGAGGGACGCCC: TCACTATCCCCTGGAGGGACGCCCAGGGACGC	11.1729	0	0	0	12.4994	8.56292	3.71418		47to58GGAGGGACGCCC: TCACTATCCCCTGGAGGGACGCCCAGGGACGC	0	0	9.3157
47to60GGATA: ACTTCACTATCCCCTGGATAGACGCCCAGGGC	0	0	0	0	0	0	0		47to60GGATA: ACTTCACTATCCCCTGGATAGACGCCCAGGGC	0	0	0
47to61GGA: ACTTCACTATCCCCTGGAACGCCCAGGGCTGC	0	0	0	0	0	0	0		47to61GGA: ACTTCACTATCCCCTGGAACGCCCAGGGCTGC	0	0	0
48TCACTATA: TCACTATCCCCTATCACTATACTGGGACTGGA	0	0	0	0	0	0	0		48TCACTATA: TCACTATCCCCTATCACTATACTGGGACTGGA	0	0	0
wt: GGCGACCAGGACTTCACTATCCCCTACTGGGA	18.2648	18.4157	17.7763	18.5838	18.2793	17.5279	18.1242		wt: GGCGACCAGGACTTCACTATCCCCTACTGGGA	17.8915	18.4058	18.3033

## Sheet: meth1 raw
	nerve	vessel	bone	skin	blood	muscle	hand								limb1	limb2	limb3
54to110: AACGACTGCCGTCCAATGGCTGTCTTGCTCTGCACA	0	0	0	0	6	0	2							54to110: AACGACTGCCGTCCAATGGCTGTCTTGCTCTGCACA	0	0	0
55to110: AACGACTGCCCTCCACATGGCTGTCTTGCTCTGCAC	0	39	7	30	0	71	96							55to110: AACGACTGCCCTCCACATGGCTGTCTTGCTCTGCAC	0	0	0
55to89: AACGACTGCCGTCCACGCGGACCGCATCCTCAAACC	0	0	0	0	0	0	0							55to89: AACGACTGCCGTCCACGCGGACCGCATCCTCAAACC	0	0	0
57to101: ACCTCAACGACTGCCGTCCTCAAACCCAATGGCTGT	0	0	36	0	95	0	0							57to101: ACCTCAACGACTGCCGTCCTCAAACCCAATGGCTGT	0	0	0
66to92: TGCCGTCCACTGGTTCAACCGCATCCTCAAACCCAA	0	0	1995	2329	3958	14255	78							66to92: TGCCGTCCACTGGTTCAACCGCATCCTCAAACCCAA	0	0	0
67to105: TGCCGTCCACTGGTTCAAACCCAATGGCTGTCTTGC	0	0	354	0	0	0	0							67to105: TGCCGTCCACTGGTTCAAACCCAATGGCTGTCTTGC	0	0	0
68to109: TGCCGTCCACTGGTTCAACAATGGCTGTCTTGCTCT	0	0	26	0	18	0	27							68to109: TGCCGTCCACTGGTTCAACAATGGCTGTCTTGCTCT	0	2	2
71to82: GTCCACTGGTTCAACCTGAAGGAGGCGGACCGCATC	0	0	0	0	0	97	96							71to82: GTCCACTGGTTCAACCTGAAGGAGGCGGACCGCATC	0	0	0
71to84AAG: ACTGGTTCAACCTGAAGGGAGGCGGACCGCATCCTC	0	0	0	0	0	0	2							71to84AAG: ACTGGTTCAACCTGAAGGGAGGCGGACCGCATCCTC	0	0	0
71to85AA: CACTGGTTCAACCTGAAGAGGCGGACCGCATCCTCA	0	0	8	12	0	0	68							71to85AA: CACTGGTTCAACCTGAAGAGGCGGACCGCATCCTCA	0	0	0
71to87AA: CACTGGTTCAACCTGAAGGCGGACCGCATCCTCAAA	0	49	36	28	33	77	243							71to87AA: CACTGGTTCAACCTGAAGGCGGACCGCATCCTCAAA	0	0	0
71to88ACC: CACTGGTTCAACCTGACCGCGGACCGCATCCTCAAA	0	0	2	0	4	0	19							71to88ACC: CACTGGTTCAACCTGACCGCGGACCGCATCCTCAAA	0	0	0
71to88AGAAGTTCCTGAAGAAGGGAAGAATAGGGAGGACAAAACAAACAATCTTACTAAGCCTAAGCCTTACTAA: TTCCTGAAGAAGGGAAGAATAGGGAGGACAAAACAA	0	0	8	6	0	11	5							71to88AGAAGTTCCTGAAGAAGGGAAGAATAGGGAGGACAAAACAAACAATCTTACTAAGCCTAAGCCTTACTAA: TTCCTGAAGAAGGGAAGAATAGGGAGGACAAAACAA	0	0	0
71to90AA: CACTGGTTCAACCTGAAGGACCGCATCCTCAAACCC	0	39	84	122	14	126	358							71to90AA: CACTGGTTCAACCTGAAGGACCGCATCCTCAAACCC	0	0	0
73to93: TCCACTGGTTCAACCTGGACCGCATCCTCAAACCCA	0	0	4	0	0	0	0							73to93: TCCACTGGTTCAACCTGGACCGCATCCTCAAACCCA	0	0	0
74to85: CACTGGTTCAACCTGGAGGAGGCGGACCGCATCCTC	0	0	1	0	0	0	14							74to85: CACTGGTTCAACCTGGAGGAGGCGGACCGCATCCTC	6	2	0
74to88: CACTGGTTCAACCTGGAGGCGGACCGCATCCTCAAA	0	0	8	0	0	0	145							74to88: CACTGGTTCAACCTGGAGGCGGACCGCATCCTCAAA	190	0	0
74to91: CACTGGTTCAACCTGGAGGACCGCATCCTCAAACCC	0	0	37	0	0	47	68							74to91: CACTGGTTCAACCTGGAGGACCGCATCCTCAAACCC	2	0	4
76to88T: CTGGTTCAACCTGGAGAATGCGGACCGCATCCTCAA	0	0	5	16	4	17	39							76to88T: CTGGTTCAACCTGGAGAATGCGGACCGCATCCTCAA	22	6	8
77to88: CTGGAGAAGGCGGACCGCATCCTCAAACCCAATGGC	0	4615	5596	20270	2609	18146	52855							77to88: CTGGAGAAGGCGGACCGCATCCTCAAACCCAATGGC	29276	9192	12868
77to89A: CTGGTTCAACCTGGAGAAGACGGACCGCATCCTCAA	0	0	0	0	0	0	0							77to89A: CTGGTTCAACCTGGAGAAGACGGACCGCATCCTCAA	10	4	2
78to88: CTGGTTCAACCTGGAGAAGTGCGGACCGCATCCTCA	0	0	3	0	0	0	15							78to88: CTGGTTCAACCTGGAGAAGTGCGGACCGCATCCTCA	0	0	0
78to89: TGGTTCAACCTGGAGAAGTCGGACCGCATCCTCAAA	0	0	318	391	0	489	963							78to89: TGGTTCAACCTGGAGAAGTCGGACCGCATCCTCAAA	0	0	0
78to90: TGGTTCAACCTGGAGAAGTGGACCGCATCCTCAAAC	0	42	151	214	125	145	675							78to90: TGGTTCAACCTGGAGAAGTGGACCGCATCCTCAAAC	28	38	56
79to88GACC: GGTTCAACCTGGAGAAGTTGACCGCGGACCGCATCC	0	0	33	23	0	22	61							79to88GACC: GGTTCAACCTGGAGAAGTTGACCGCGGACCGCATCC	2	0	0
79to89: GGTTCAACCTGGAGAAGTTCGGACCGCATCCTCAAA	0	0	0	0	0	0	0							79to89: GGTTCAACCTGGAGAAGTTCGGACCGCATCCTCAAA	0	0	0
79to91: GGTTCAACCTGGAGAAGTTGACCGCATCCTCAAACC	0	28872	100249	148099	85926	103973	420187							79to91: GGTTCAACCTGGAGAAGTTGACCGCATCCTCAAACC	67022	40332	93770
81to90: TTCAACCTGGAGAAGTTCCGGACCGCATCCTCAAAC	0	0	0	0	0	0	0							81to90: TTCAACCTGGAGAAGTTCCGGACCGCATCCTCAAAC	234	0	2
81to91: TTCAACCTGGAGAAGTTCCGACCGCATCCTCAAACC	0	0	0	0	0	0	0							81to91: TTCAACCTGGAGAAGTTCCGACCGCATCCTCAAACC	0	0	0
81to94: TTCAACCTGGAGAAGTTCCCGCATCCTCAAACCCAA	0	0	57	0	0	57	67							81to94: TTCAACCTGGAGAAGTTCCCGCATCCTCAAACCCAA	494	0	4
81to95: TTCAACCTGGAGAAGTTCCGCATCCTCAAACCCAAT	0	0	0	0	0	0	0							81to95: TTCAACCTGGAGAAGTTCCGCATCCTCAAACCCAAT	0	0	0
81to96: CAACCTCGAGAAGTTCCCGCATCCTCAAACCCAATG	0	0	0	0	0	0	0							81to96: CAACCTCGAGAAGTTCCCGCATCCTCAAACCCAATG	0	0	0
82to102: TCAACCTGGAGAAGTTCCTCAAACCCAATGGCTGTC	0	0	622	0	2767	1759	888							82to102: TCAACCTGGAGAAGTTCCTCAAACCCAATGGCTGTC	0	0	0
82to116: TCAACCTGGAGAAGTTCCTGTCTTGCTCTGCACACC	0	0	0	0	0	0	0							82to116: TCAACCTGGAGAAGTTCCTGTCTTGCTCTGCACACC	0	0	0
82to120: TCAACCTGGAGAAGTTCCTTGCTCTGCACACCCTGT	0	0	32	1438	2573	0	1632							82to120: TCAACCTGGAGAAGTTCCTTGCTCTGCACACCCTGT	428	212	0
82to87TC: TGGAGAAGTTCCTTCGGCGGACCGCATCCTCAAACC	0	0	0	0	0	10	0							82to87TC: TGGAGAAGTTCCTTCGGCGGACCGCATCCTCAAACC	0	0	0
83to152: CAACCTGGAGAAGTTCCTGTGTTCTATAAGGACCGT	0	0	7	0	0	14	3							83to152: CAACCTGGAGAAGTTCCTGTGTTCTATAAGGACCGT	0	0	0
83to153G: CAACCTGGAGAAGTTCCTGGGTTCTATAAGGACCGT	0	0	4512	1037	0	9110	3007							83to153G: CAACCTGGAGAAGTTCCTGGGTTCTATAAGGACCGT	242	88	90
83to88: CAACCTGGAGAAGTTCCTGGCGGACCGCATCCTCAA	0	0	3	0	0	0	3							83to88: CAACCTGGAGAAGTTCCTGGCGGACCGCATCCTCAA	0	0	0
83to90: CAACCTGGAGAAGTTCCTGCGGACCGCATCCTCAAA	0	2468	221	0	0	211	1028							83to90: CAACCTGGAGAAGTTCCTGCGGACCGCATCCTCAAA	0	0	0
84: AACCTGGAGAAGTTCCTGAGGAGGCGGACCGCATCC	0	0	18	0	0	0	0							84: AACCTGGAGAAGTTCCTGAGGAGGCGGACCGCATCC	0	0	0
84to153: AACCTGGAGAAGTTCCTGAGTTCTATAAGGACCGTT	0	0	1	0	0	3	0							84to153: AACCTGGAGAAGTTCCTGAGTTCTATAAGGACCGTT	0	0	0
84to87: AACCTGGAGAAGTTCCTGAGGCGGACCGCATCCTCA	4	0	0	0	0	9	0							84to87: AACCTGGAGAAGTTCCTGAGGCGGACCGCATCCTCA	8	2	2
84to88CC: ACCTGGAGAAGTTCCTGACCGCGGACCGCATCCTCA	31342	37810	300501	59233	29360	162931	156168							84to88CC: ACCTGGAGAAGTTCCTGACCGCGGACCGCATCCTCA	135310	43544	76070
84to89: AACCTGGAGAAGTTCCTGACGGACCGCATCCTCAAA	0	25	249	52	31	101	127							84to89: AACCTGGAGAAGTTCCTGACGGACCGCATCCTCAAA	90	58	62
84to95: TGGAGAAGTTCCTGACCGCATCCTCAAACCCAATGG	0	0	1028	0	0	330	1523							84to95: TGGAGAAGTTCCTGACCGCATCCTCAAACCCAATGG	973	2	4
84to95CC: ACCTGGAGAAGTTCCTGACCGCATCCTCAAACCCAA	0	0	1085	0	0	356	1631							84to95CC: ACCTGGAGAAGTTCCTGACCGCATCCTCAAACCCAA	1017	2	2
85to88C: CCTGGAGAAGTTCCTGAACGCGGACCGCATCCTCAA	132	66	810	138	103	461	433							85to88C: CCTGGAGAAGTTCCTGAACGCGGACCGCATCCTCAA	442	144	196
85to92: CCTGGAGAAGTTCCTGAAACCGCATCCTCAAACCCA	0	0	8	62	2	13	28							85to92: CCTGGAGAAGTTCCTGAAACCGCATCCTCAAACCCA	14	8	0
85to93: CCTGGAGAAGTTCCTGAACCGCATCCTCAAACCCAA	0	0	831	10612	0	7373	3436							85to93: CCTGGAGAAGTTCCTGAACCGCATCCTCAAACCCAA	15420	3378	4
85to96ACCA: CCTGGAGAAGTTCCTGAAACCACATCCTCAAACCCA	0	0	2390	17031	0	1798	8441							85to96ACCA: CCTGGAGAAGTTCCTGAAACCACATCCTCAAACCCA	4900	3230	8
86CCATTGGGTGT: GAAGTTCCTGAAGCCATTGGGTGTGAGGCGGACCGC	0	0	7	0	3	4	2							86CCATTGGGTGT: GAAGTTCCTGAAGCCATTGGGTGTGAGGCGGACCGC	8	2	0
86CCATTGGGTTT: AAGTTCCTGAAGCCATTGGGTTTGAGGCGGACCGCA	18875	0	13170	784	7329	27780	10151							86CCATTGGGTTT: AAGTTCCTGAAGCCATTGGGTTTGAGGCGGACCGCA	21326	3118	6
86to86: CTGGAGAAGTTCCTGAAGAGGCGGACCGCATCCTCA	0	0	5931	3565	0	5257	8658							86to86: CTGGAGAAGTTCCTGAAGAGGCGGACCGCATCCTCA	1640	1916	2
86to91TT: CTGGAGAAGTTCCTGAAGTTGACCGCATCCTCAAAC	0	11	3	6	6	17	8							86to91TT: CTGGAGAAGTTCCTGAAGTTGACCGCATCCTCAAAC	2	0	0
87CCATTGGGTTTG: AAGTTCCTGAAGGCCATTGGGTTTGAGGCGGACCGC	0	0	0	0	0	0	0							87CCATTGGGTTTG: AAGTTCCTGAAGGCCATTGGGTTTGAGGCGGACCGC	20	6	12
87G: TGGAGAAGTTCCTGAAGGGAGGCGGACCGCATCCTC	0	0	0	0	0	0	0							87G: TGGAGAAGTTCCTGAAGGGAGGCGGACCGCATCCTC	0	0	0
87insGAACCGCATGA: TCCTGAAGGGAACCGCATGAAGGCGGACCGCATCCT	0	0	3	1	0	4	0							87insGAACCGCATGA: TCCTGAAGGGAACCGCATGAAGGCGGACCGCATCCT	0	0	0
87to89: TGGAGAAGTTCCTGAAGGCGGACCGCATCCTCAAAC	64313	23952	111719	17265	43400	123191	78704							87to89: TGGAGAAGTTCCTGAAGGCGGACCGCATCCTCAAAC	52494	18410	32064
87to91: TGGAGAAGTTCCTGAAGGGACCGCATCCTCAAACCC	0	0	4	4	0	17	10							87to91: TGGAGAAGTTCCTGAAGGGACCGCATCCTCAAACCC	0	0	0
87to92TGG: AGAAGTTCCTGAAGGTGGACCGCATCCTCAAACCCA	0	0	29	0	8	17	22							87to92TGG: AGAAGTTCCTGAAGGTGGACCGCATCCTCAAACCCA	28	12	12
88to92: GGAGAAGTTCCTGAAGGAACCGCATCCTCAAACCCA	0	11287	19911	17089	46230	61072	26530							88to92: GGAGAAGTTCCTGAAGGAACCGCATCCTCAAACCCA	4840	3392	2304
88to93: GGAGAAGTTCCTGAAGGACCGCATCCTCAAACCCAA	8856	31236	344851	70034	30969	163561	159890							88to93: GGAGAAGTTCCTGAAGGACCGCATCCTCAAACCCAA	150932	57640	87718
wt: GGTTCAACCTGGAGAAGTTCCTGAAGGAGGCGGACC	150557	33300	31156	52522	78924	96134	67402							wt: GGTTCAACCTGGAGAAGTTCCTGAAGGAGGCGGACC	37086	11994	25920
	274079	173811	948120	422413	334497	799066	1005808								524506	196734	331192
	3.64858	5.75338	1.05472	2.36735	2.98956	1.25146	0.994226								1.90656	5.08301	3.0194

## Sheet: meth 1 normalized
	nerve	vessel	bone	skin	blood	muscle	hand								limb1	limb2	limb3
54to110: AACGACTGCCGTCCAATGGCTGTCTTGCTCTGCACA	0	0	0	0	17.9374	0	1.98861							54to110: AACGACTGCCGTCCAATGGCTGTCTTGCTCTGCACA	0	0	0
55to110: AACGACTGCCCTCCACATGGCTGTCTTGCTCTGCAC	0	224.382	7.38303	71.0205	0	88.8537	95.4531							55to110: AACGACTGCCCTCCACATGGCTGTCTTGCTCTGCAC	0	0	0
55to89: AACGACTGCCGTCCACGCGGACCGCATCCTCAAACC	0	0	0	0	0	0	0							55to89: AACGACTGCCGTCCACGCGGACCGCATCCTCAAACC	0	0	0
57to101: ACCTCAACGACTGCCGTCCTCAAACCCAATGGCTGT	0	0	37.9699	0	284.009	0	0							57to101: ACCTCAACGACTGCCGTCCTCAAACCCAATGGCTGT	0	0	0
66to92: TGCCGTCCACTGGTTCAACCGCATCCTCAAACCCAA	0	0	2104.16	5513.56	11832.7	17839.6	77.5556							66to92: TGCCGTCCACTGGTTCAACCGCATCCTCAAACCCAA	0	0	0
67to105: TGCCGTCCACTGGTTCAAACCCAATGGCTGTCTTGC	0	0	373.37	0	0	0	0							67to105: TGCCGTCCACTGGTTCAAACCCAATGGCTGTCTTGC	0	0	0
68to109: TGCCGTCCACTGGTTCAACAATGGCTGTCTTGCTCT	0	0	27.4227	0	53.8121	0	26.8462							68to109: TGCCGTCCACTGGTTCAACAATGGCTGTCTTGCTCT	0	3.47408	3.47408
71to82: GTCCACTGGTTCAACCTGAAGGAGGCGGACCGCATC	0	0	0	0	0	121.392	95.4531							71to82: GTCCACTGGTTCAACCTGAAGGAGGCGGACCGCATC	0	0	0
71to84AAG: ACTGGTTCAACCTGAAGGGAGGCGGACCGCATCCTC	0	0	0	0	0	0	1.98861							71to84AAG: ACTGGTTCAACCTGAAGGGAGGCGGACCGCATCCTC	0	0	0
71to85AA: CACTGGTTCAACCTGAAGAGGCGGACCGCATCCTCA	0	0	8.43775	28.4082	0	0	67.6126							71to85AA: CACTGGTTCAACCTGAAGAGGCGGACCGCATCCTCA	0	0	0
71to87AA: CACTGGTTCAACCTGAAGGCGGACCGCATCCTCAAA	0	281.915	37.9699	66.2858	98.6556	96.3625	241.616							71to87AA: CACTGGTTCAACCTGAAGGCGGACCGCATCCTCAAA	0	0	0
71to88ACC: CACTGGTTCAACCTGACCGCGGACCGCATCCTCAAA	0	0	2.10944	0	11.9583	0	18.8918							71to88ACC: CACTGGTTCAACCTGACCGCGGACCGCATCCTCAAA	0	0	0
71to88AGAAGTTCCTGAAGAAGGGAAGAATAGGGAGGACAAAACAAACAATCTTACTAAGCCTAAGCCTTACTAA: TTCCTGAAGAAGGGAAGAATAGGGAGGACAAAACAA	0	0	8.43775	14.2041	0	13.7661	4.97151							71to88AGAAGTTCCTGAAGAAGGGAAGAATAGGGAGGACAAAACAAACAATCTTACTAAGCCTAAGCCTTACTAA: TTCCTGAAGAAGGGAAGAATAGGGAGGACAAAACAA	0	0	0
71to90AA: CACTGGTTCAACCTGAAGGACCGCATCCTCAAACCC	0	224.382	88.5964	288.817	41.8539	157.684	355.96							71to90AA: CACTGGTTCAACCTGAAGGACCGCATCCTCAAACCC	0	0	0
73to93: TCCACTGGTTCAACCTGGACCGCATCCTCAAACCCA	0	0	4.21888	0	0	0	0							73to93: TCCACTGGTTCAACCTGGACCGCATCCTCAAACCCA	0	0	0
74to85: CACTGGTTCAACCTGGAGGAGGCGGACCGCATCCTC	0	0	1.05472	0	0	0	13.9202							74to85: CACTGGTTCAACCTGGAGGAGGCGGACCGCATCCTC	10.4222	3.47408	0
74to88: CACTGGTTCAACCTGGAGGCGGACCGCATCCTCAAA	0	0	8.43775	0	0	0	144.174							74to88: CACTGGTTCAACCTGGAGGCGGACCGCATCCTCAAA	330.038	0	0
74to91: CACTGGTTCAACCTGGAGGACCGCATCCTCAAACCC	0	0	39.0246	0	0	58.8187	67.6126							74to91: CACTGGTTCAACCTGGAGGACCGCATCCTCAAACCC	3.47408	0	6.94816
76to88T: CTGGTTCAACCTGGAGAATGCGGACCGCATCCTCAA	0	0	5.27359	37.8776	11.9583	21.2748	38.7778							76to88T: CTGGTTCAACCTGGAGAATGCGGACCGCATCCTCAA	38.2149	10.4222	13.8963
77to88: CTGGAGAAGGCGGACCGCATCCTCAAACCCAATGGC	0	26551.8	5902.21	47986.2	7799.77	22709	52553.9							77to88: CTGGAGAAGGCGGACCGCATCCTCAAACCCAATGGC	50853.6	15966.9	22352.2
77to89A: CTGGTTCAACCTGGAGAAGACGGACCGCATCCTCAA	0	0	0	0	0	0	0							77to89A: CTGGTTCAACCTGGAGAAGACGGACCGCATCCTCAA	17.3704	6.94816	3.47408
78to88: CTGGTTCAACCTGGAGAAGTGCGGACCGCATCCTCA	0	0	3.16416	0	0	0	14.9145							78to88: CTGGTTCAACCTGGAGAAGTGCGGACCGCATCCTCA	0	0	0
78to89: TGGTTCAACCTGGAGAAGTCGGACCGCATCCTCAAA	0	0	335.401	925.634	0	611.964	957.513							78to89: TGGTTCAACCTGGAGAAGTCGGACCGCATCCTCAAA	0	0	0
78to90: TGGTTCAACCTGGAGAAGTGGACCGCATCCTCAAAC	0	241.642	159.263	506.613	373.695	181.462	671.154							78to90: TGGTTCAACCTGGAGAAGTGGACCGCATCCTCAAAC	48.6371	66.0075	97.2742
79to88GACC: GGTTCAACCTGGAGAAGTTGACCGCGGACCGCATCC	0	0	34.8057	54.4491	0	27.5321	60.6525							79to88GACC: GGTTCAACCTGGAGAAGTTGACCGCGGACCGCATCC	3.47408	0	0
79to89: GGTTCAACCTGGAGAAGTTCGGACCGCATCCTCAAA	0	0	0	0	0	0	0							79to89: GGTTCAACCTGGAGAAGTTCGGACCGCATCCTCAAA	0	0	0
79to91: GGTTCAACCTGGAGAAGTTGACCGCATCCTCAAACC	0	166111	105735	350602	256881	130118	417793							79to91: GGTTCAACCTGGAGAAGTTGACCGCATCCTCAAACC	116420	70058.3	162882
81to90: TTCAACCTGGAGAAGTTCCGGACCGCATCCTCAAAC	0	0	0	0	0	0	0							81to90: TTCAACCTGGAGAAGTTCCGGACCGCATCCTCAAAC	406.467	0	3.47408
81to91: TTCAACCTGGAGAAGTTCCGACCGCATCCTCAAACC	0	0	0	0	0	0	0							81to91: TTCAACCTGGAGAAGTTCCGACCGCATCCTCAAACC	0	0	0
81to94: TTCAACCTGGAGAAGTTCCCGCATCCTCAAACCCAA	0	0	60.119	0	0	71.3333	66.6183							81to94: TTCAACCTGGAGAAGTTCCCGCATCCTCAAACCCAA	858.098	0	6.94816
81to95: TTCAACCTGGAGAAGTTCCGCATCCTCAAACCCAAT	0	0	0	0	0	0	0							81to95: TTCAACCTGGAGAAGTTCCGCATCCTCAAACCCAAT	0	0	0
81to96: CAACCTCGAGAAGTTCCCGCATCCTCAAACCCAATG	0	0	0	0	0	0	0							81to96: CAACCTCGAGAAGTTCCCGCATCCTCAAACCCAATG	0	0	0
82to102: TCAACCTGGAGAAGTTCCTCAAACCCAATGGCTGTC	0	0	656.035	0	8272.12	2201.32	882.941							82to102: TCAACCTGGAGAAGTTCCTCAAACCCAATGGCTGTC	0	0	0
82to116: TCAACCTGGAGAAGTTCCTGTCTTGCTCTGCACACC	0	0	0	0	0	0	0							82to116: TCAACCTGGAGAAGTTCCTGTCTTGCTCTGCACACC	0	0	0
82to120: TCAACCTGGAGAAGTTCCTTGCTCTGCACACCCTGT	0	0	33.751	3404.25	7692.15	0	1622.7							82to120: TCAACCTGGAGAAGTTCCTTGCTCTGCACACCCTGT	743.453	368.252	0
82to87TC: TGGAGAAGTTCCTTCGGCGGACCGCATCCTCAAACC	0	0	0	0	0	12.5146	0							82to87TC: TGGAGAAGTTCCTTCGGCGGACCGCATCCTCAAACC	0	0	0
83to152: CAACCTGGAGAAGTTCCTGTGTTCTATAAGGACCGT	0	0	7.38303	0	0	17.5205	2.98291							83to152: CAACCTGGAGAAGTTCCTGTGTTCTATAAGGACCGT	0	0	0
83to153G: CAACCTGGAGAAGTTCCTGGGTTCTATAAGGACCGT	0	0	4758.89	2454.94	0	11400.8	2989.87							83to153G: CAACCTGGAGAAGTTCCTGGGTTCTATAAGGACCGT	420.364	152.86	156.334
83to88: CAACCTGGAGAAGTTCCTGGCGGACCGCATCCTCAA	0	0	3.16416	0	0	0	2.98291							83to88: CAACCTGGAGAAGTTCCTGGCGGACCGCATCCTCAA	0	0	0
83to90: CAACCTGGAGAAGTTCCTGCGGACCGCATCCTCAAA	0	14199.3	233.093	0	0	264.058	1022.14							83to90: CAACCTGGAGAAGTTCCTGCGGACCGCATCCTCAAA	0	0	0
84: AACCTGGAGAAGTTCCTGAGGAGGCGGACCGCATCC	0	0	18.9849	0	0	0	0							84: AACCTGGAGAAGTTCCTGAGGAGGCGGACCGCATCC	0	0	0
84to153: AACCTGGAGAAGTTCCTGAGTTCTATAAGGACCGTT	0	0	1.05472	0	0	3.75438	0							84to153: AACCTGGAGAAGTTCCTGAGTTCTATAAGGACCGTT	0	0	0
84to87: AACCTGGAGAAGTTCCTGAGGCGGACCGCATCCTCA	14.5943	0	0	0	0	11.2631	0							84to87: AACCTGGAGAAGTTCCTGAGGCGGACCGCATCCTCA	13.8963	3.47408	3.47408
84to88CC: ACCTGGAGAAGTTCCTGACCGCGGACCGCATCCTCA	114354	217535	316944	140225	87773.6	203902	155278							84to88CC: ACCTGGAGAAGTTCCTGACCGCGGACCGCATCCTCA	235039	75637.7	132137
84to89: AACCTGGAGAAGTTCCTGACGGACCGCATCCTCAAA	0	143.834	262.625	123.102	92.6765	126.398	126.276							84to89: AACCTGGAGAAGTTCCTGACGGACCGCATCCTCAAA	156.334	100.748	107.696
84to95: TGGAGAAGTTCCTGACCGCATCCTCAAACCCAATGG	0	0	1084.25	0	0	412.982	1514.32							84to95: TGGAGAAGTTCCTGACCGCATCCTCAAACCCAATGG	1690.14	3.47408	6.94816
84to95CC: ACCTGGAGAAGTTCCTGACCGCATCCTCAAACCCAA	0	0	1144.37	0	0	445.52	1621.71							84to95CC: ACCTGGAGAAGTTCCTGACCGCATCCTCAAACCCAA	1766.57	3.47408	3.47408
85to88C: CCTGGAGAAGTTCCTGAACGCGGACCGCATCCTCAA	481.613	379.723	854.322	326.694	307.925	576.924	430.533							85to88C: CCTGGAGAAGTTCCTGAACGCGGACCGCATCCTCAA	767.772	250.134	340.46
85to92: CCTGGAGAAGTTCCTGAAACCGCATCCTCAAACCCA	0	0	8.43775	146.776	5.97913	16.269	27.8405							85to92: CCTGGAGAAGTTCCTGAAACCGCATCCTCAAACCCA	24.3186	13.8963	0
85to93: CCTGGAGAAGTTCCTGAACCGCATCCTCAAACCCAA	0	0	876.471	25122.3	0	9227.02	3416.42							85to93: CCTGGAGAAGTTCCTGAACCGCATCCTCAAACCCAA	26785.2	5867.72	6.94816
85to96ACCA: CCTGGAGAAGTTCCTGAAACCACATCCTCAAACCCA	0	0	2520.78	40318.4	0	2250.13	8392.91							85to96ACCA: CCTGGAGAAGTTCCTGAAACCACATCCTCAAACCCA	8511.5	5610.64	13.8963
86CCATTGGGTGT: GAAGTTCCTGAAGCCATTGGGTGTGAGGCGGACCGC	0	0	7.38303	0	8.96869	5.00584	1.98861							86CCATTGGGTGT: GAAGTTCCTGAAGCCATTGGGTGTGAGGCGGACCGC	13.8963	3.47408	0
86CCATTGGGTTT: AAGTTCCTGAAGCCATTGGGTTTGAGGCGGACCGCA	68867	0	13890.6	1856	21910.5	34765.6	10093.2							86CCATTGGGTTT: AAGTTCCTGAAGCCATTGGGTTTGAGGCGGACCGCA	37044.1	5416.09	10.4222
86to86: CTGGAGAAGTTCCTGAAGAGGCGGACCGCATCCTCA	0	0	6255.54	8439.61	0	6578.93	8608.67							86to86: CTGGAGAAGTTCCTGAAGAGGCGGACCGCATCCTCA	2848.75	3328.17	3.47408
86to91TT: CTGGAGAAGTTCCTGAAGTTGACCGCATCCTCAAAC	0	63.2871	3.16416	14.2041	17.9374	21.2748	7.95442							86to91TT: CTGGAGAAGTTCCTGAAGTTGACCGCATCCTCAAAC	3.47408	0	0
87CCATTGGGTTTG: AAGTTCCTGAAGGCCATTGGGTTTGAGGCGGACCGC	0	0	0	0	0	0	0							87CCATTGGGTTTG: AAGTTCCTGAAGGCCATTGGGTTTGAGGCGGACCGC	34.7408	10.4222	20.8445
87G: TGGAGAAGTTCCTGAAGGGAGGCGGACCGCATCCTC	0	0	0	0	0	0	0							87G: TGGAGAAGTTCCTGAAGGGAGGCGGACCGCATCCTC	0	0	0
87insGAACCGCATGA: TCCTGAAGGGAACCGCATGAAGGCGGACCGCATCCT	0	0	3.16416	2.36735	0	5.00584	0							87insGAACCGCATGA: TCCTGAAGGGAACCGCATGAAGGCGGACCGCATCCT	0	0	0
87to89: TGGAGAAGTTCCTGAAGGCGGACCGCATCCTCAAAC	234651	137805	117832	40872.3	129747	154169	78255.6							87to89: TGGAGAAGTTCCTGAAGGCGGACCGCATCCTCAAAC	91184.2	31978.9	55696.4
87to91: TGGAGAAGTTCCTGAAGGGACCGCATCCTCAAACCC	0	0	4.21888	9.46941	0	21.2748	9.94303							87to91: TGGAGAAGTTCCTGAAGGGACCGCATCCTCAAACCC	0	0	0
87to92TGG: AGAAGTTCCTGAAGGTGGACCGCATCCTCAAACCCA	0	0	30.5868	0	23.9165	21.2748	21.8747							87to92TGG: AGAAGTTCCTGAAGGTGGACCGCATCCTCAAACCCA	48.6371	20.8445	20.8445
88to92: GGAGAAGTTCCTGAAGGAACCGCATCCTCAAACCCA	0	64938.4	21000.5	40455.7	138208	76429.2	26378.8							88to92: GGAGAAGTTCCTGAAGGAACCGCATCCTCAAACCCA	8407.27	5892.04	4002.14
88to93: GGAGAAGTTCCTGAAGGACCGCATCCTCAAACCCAA	32311.9	179712	363721	165795	92583.8	204690	158979							88to93: GGAGAAGTTCCTGAAGGACCGCATCCTCAAACCCAA	262175	100123	152370
wt: GGTTCAACCTGGAGAAGTTCCTGAAGGAGGCGGACC	549320	191587	32860.8	124338	235948	120308	67018							wt: GGTTCAACCTGGAGAAGTTCCTGAAGGAGGCGGACC	70706.5	22867.2	49417.9

## Sheet: meth1 log
	nerve	vessel	bone	skin	blood	muscle	hand			limb1	limb2	limb3
54to110: AACGACTGCCGTCCAATGGCTGTCTTGCTCTGCACA	0	0	0	0	4.24316	0	1.57947		54to110: AACGACTGCCGTCCAATGGCTGTCTTGCTCTGCACA	0	0	0
55to110: AACGACTGCCCTCCACATGGCTGTCTTGCTCTGCAC	0	7.81623	3.06747	6.17034	0	6.48951	6.59176		55to110: AACGACTGCCCTCCACATGGCTGTCTTGCTCTGCAC	0	0	0
55to89: AACGACTGCCGTCCACGCGGACCGCATCCTCAAACC	0	0	0	0	0	0	0		55to89: AACGACTGCCGTCCACGCGGACCGCATCCTCAAACC	0	0	0
57to101: ACCTCAACGACTGCCGTCCTCAAACCCAATGGCTGT	0	0	5.28429	0	8.15486	0	0		57to101: ACCTCAACGACTGCCGTCCTCAAACCCAATGGCTGT	0	0	0
66to92: TGCCGTCCACTGGTTCAACCGCATCCTCAAACCCAA	0	0	11.0397	12.429	13.5306	14.1229	6.29564		66to92: TGCCGTCCACTGGTTCAACCGCATCCTCAAACCCAA	0	0	0
67to105: TGCCGTCCACTGGTTCAAACCCAATGGCTGTCTTGC	0	0	8.54832	0	0	0	0		67to105: TGCCGTCCACTGGTTCAAACCCAATGGCTGTCTTGC	0	0	0
68to109: TGCCGTCCACTGGTTCAACAATGGCTGTCTTGCTCT	0	0	4.82897	0	5.77642	0	4.79941		68to109: TGCCGTCCACTGGTTCAACAATGGCTGTCTTGCTCT	0	2.16159	2.16159
71to82: GTCCACTGGTTCAACCTGAAGGAGGCGGACCGCATC	0	0	0	0	0	6.93536	6.59176		71to82: GTCCACTGGTTCAACCTGAAGGAGGCGGACCGCATC	0	0	0
71to84AAG: ACTGGTTCAACCTGAAGGGAGGCGGACCGCATCCTC	0	0	0	0	0	0	1.57947		71to84AAG: ACTGGTTCAACCTGAAGGGAGGCGGACCGCATCCTC	0	0	0
71to85AA: CACTGGTTCAACCTGAAGAGGCGGACCGCATCCTCA	0	0	3.23844	4.87815	0	0	6.1004		71to85AA: CACTGGTTCAACCTGAAGAGGCGGACCGCATCCTCA	0	0	0
71to87AA: CACTGGTTCAACCTGAAGGCGGACCGCATCCTCAAA	0	8.14423	5.28429	6.07223	6.63888	6.60529	7.92253		71to87AA: CACTGGTTCAACCTGAAGGCGGACCGCATCCTCAAA	0	0	0
71to88ACC: CACTGGTTCAACCTGACCGCGGACCGCATCCTCAAA	0	0	1.63665	0	3.6958	0	4.3141		71to88ACC: CACTGGTTCAACCTGACCGCGGACCGCATCCTCAAA	0	0	0
71to88AGAAGTTCCTGAAGAAGGGAAGAATAGGGAGGACAAAACAAACAATCTTACTAAGCCTAAGCCTTACTAA: TTCCTGAAGAAGGGAAGAATAGGGAGGACAAAACAA	0	0	3.23844	3.92639	0	3.88421	2.5781		71to88AGAAGTTCCTGAAGAAGGGAAGAATAGGGAGGACAAAACAAACAATCTTACTAAGCCTAAGCCTTACTAA: TTCCTGAAGAAGGGAAGAATAGGGAGGACAAAACAA	0	0	0
71to90AA: CACTGGTTCAACCTGAAGGACCGCATCCTCAAACCC	0	7.81623	6.48537	8.179	5.42135	7.31001	8.47962		71to90AA: CACTGGTTCAACCTGAAGGACCGCATCCTCAAACCC	0	0	0
73to93: TCCACTGGTTCAACCTGGACCGCATCCTCAAACCCA	0	0	2.38374	0	0	0	0		73to93: TCCACTGGTTCAACCTGGACCGCATCCTCAAACCCA	0	0	0
74to85: CACTGGTTCAACCTGGAGGAGGCGGACCGCATCCTC	0	0	1.03894	0	0	0	3.8992		74to85: CACTGGTTCAACCTGGAGGAGGCGGACCGCATCCTC	3.51377	2.16159	0
74to88: CACTGGTTCAACCTGGAGGCGGACCGCATCCTCAAA	0	0	3.23844	0	0	0	7.18164		74to88: CACTGGTTCAACCTGGAGGCGGACCGCATCCTCAAA	8.37085	0	0
74to91: CACTGGTTCAACCTGGAGGACCGCATCCTCAAACCC	0	0	5.32281	0	0	5.90252	6.1004		74to91: CACTGGTTCAACCTGGAGGACCGCATCCTCAAACCC	2.16159	0	2.99062
76to88T: CTGGTTCAACCTGGAGAATGCGGACCGCATCCTCAA	0	0	2.64929	5.28087	3.6958	4.47734	5.31389		76to88T: CTGGTTCAACCTGGAGAATGCGGACCGCATCCTCAA	5.29333	3.51377	3.89688
77to88: CTGGAGAAGGCGGACCGCATCCTCAAACCCAATGGC	0	14.6966	12.5273	15.5504	12.9294	14.471	15.6815		77to88: CTGGAGAAGGCGGACCGCATCCTCAAACCCAATGGC	15.6341	13.9629	14.4482
77to89A: CTGGTTCAACCTGGAGAAGACGGACCGCATCCTCAA	0	0	0	0	0	0	0		77to89A: CTGGTTCAACCTGGAGAAGACGGACCGCATCCTCAA	4.19931	2.99062	2.16159
78to88: CTGGTTCAACCTGGAGAAGTGCGGACCGCATCCTCA	0	0	2.05802	0	0	0	3.99227		78to88: CTGGTTCAACCTGGAGAAGTGCGGACCGCATCCTCA	0	0	0
78to89: TGGTTCAACCTGGAGAAGTCGGACCGCATCCTCAAA	0	0	8.39404	9.85586	0	9.25966	9.90465		78to89: TGGTTCAACCTGGAGAAGTCGGACCGCATCCTCAAA	0	0	0
78to90: TGGTTCAACCTGGAGAAGTGGACCGCATCCTCAAAC	0	7.92268	7.32429	8.98759	8.54957	7.51145	9.39265		78to90: TGGTTCAACCTGGAGAAGTGGACCGCATCCTCAAAC	5.63335	6.06625	6.61874
79to88GACC: GGTTCAACCTGGAGAAGTTGACCGCGGACCGCATCC	0	0	5.16212	5.79309	0	4.83452	5.94609		79to88GACC: GGTTCAACCTGGAGAAGTTGACCGCGGACCGCATCC	2.16159	0	0
79to89: GGTTCAACCTGGAGAAGTTCGGACCGCATCCTCAAA	0	0	0	0	0	0	0		79to89: GGTTCAACCTGGAGAAGTTCGGACCGCATCCTCAAA	0	0	0
79to91: GGTTCAACCTGGAGAAGTTGACCGCATCCTCAAACC	0	17.3418	16.6901	18.4195	17.9707	16.9895	18.6724		79to91: GGTTCAACCTGGAGAAGTTGACCGCATCCTCAAACC	16.829	16.0963	17.3135
81to90: TTCAACCTGGAGAAGTTCCGGACCGCATCCTCAAAC	0	0	0	0	0	0	0		81to90: TTCAACCTGGAGAAGTTCCGGACCGCATCCTCAAAC	8.67054	0	2.16159
81to91: TTCAACCTGGAGAAGTTCCGACCGCATCCTCAAACC	0	0	0	0	0	0	0		81to91: TTCAACCTGGAGAAGTTCCGACCGCATCCTCAAACC	0	0	0
81to94: TTCAACCTGGAGAAGTTCCCGCATCCTCAAACCCAA	0	0	5.93355	0	0	6.17659	6.07934		81to94: TTCAACCTGGAGAAGTTCCCGCATCCTCAAACCCAA	9.74668	0	2.99062
81to95: TTCAACCTGGAGAAGTTCCGCATCCTCAAACCCAAT	0	0	0	0	0	0	0		81to95: TTCAACCTGGAGAAGTTCCGCATCCTCAAACCCAAT	0	0	0
81to96: CAACCTCGAGAAGTTCCCGCATCCTCAAACCCAATG	0	0	0	0	0	0	0		81to96: CAACCTCGAGAAGTTCCCGCATCCTCAAACCCAATG	0	0	0
82to102: TCAACCTGGAGAAGTTCCTCAAACCCAATGGCTGTC	0	0	9.35983	0	13.0142	11.1048	9.78781		82to102: TCAACCTGGAGAAGTTCCTCAAACCCAATGGCTGTC	0	0	0
82to116: TCAACCTGGAGAAGTTCCTGTCTTGCTCTGCACACC	0	0	0	0	0	0	0		82to116: TCAACCTGGAGAAGTTCCTGTCTTGCTCTGCACACC	0	0	0
82to120: TCAACCTGGAGAAGTTCCTTGCTCTGCACACCCTGT	0	0	5.11898	11.7335	12.9094	0	10.6651		82to120: TCAACCTGGAGAAGTTCCTTGCTCTGCACACCCTGT	9.54004	8.52846	0
82to87TC: TGGAGAAGTTCCTTCGGCGGACCGCATCCTCAAACC	0	0	0	0	0	3.75645	0		82to87TC: TGGAGAAGTTCCTTCGGCGGACCGCATCCTCAAACC	0	0	0
83to152: CAACCTGGAGAAGTTCCTGTGTTCTATAAGGACCGT	0	0	3.06747	0	0	4.21105	1.99382		83to152: CAACCTGGAGAAGTTCCTGTGTTCTATAAGGACCGT	0	0	0
83to153G: CAACCTGGAGAAGTTCCTGGGTTCTATAAGGACCGT	0	0	12.2167	11.2621	0	13.477	11.5463		83to153G: CAACCTGGAGAAGTTCCTGGGTTCTATAAGGACCGT	8.71892	7.26547	7.29768
83to88: CAACCTGGAGAAGTTCCTGGCGGACCGCATCCTCAA	0	0	2.05802	0	0	0	1.99382		83to88: CAACCTGGAGAAGTTCCTGGCGGACCGCATCCTCAA	0	0	0
83to90: CAACCTGGAGAAGTTCCTGCGGACCGCATCCTCAAA	0	13.7936	7.87094	0	0	8.05017	9.99879		83to90: CAACCTGGAGAAGTTCCTGCGGACCGCATCCTCAAA	0	0	0
84: AACCTGGAGAAGTTCCTGAGGAGGCGGACCGCATCC	0	0	4.32084	0	0	0	0		84: AACCTGGAGAAGTTCCTGAGGAGGCGGACCGCATCC	0	0	0
84to153: AACCTGGAGAAGTTCCTGAGTTCTATAAGGACCGTT	0	0	1.03894	0	0	2.24926	0		84to153: AACCTGGAGAAGTTCCTGAGTTCTATAAGGACCGTT	0	0	0
84to87: AACCTGGAGAAGTTCCTGAGGCGGACCGCATCCTCA	3.96295	0	0	0	0	3.61626	0		84to87: AACCTGGAGAAGTTCCTGAGGCGGACCGCATCCTCA	3.89688	2.16159	2.16159
84to88CC: ACCTGGAGAAGTTCCTGACCGCGGACCGCATCCTCA	16.8032	17.7309	18.2739	17.0974	16.4215	17.6375	17.2445		84to88CC: ACCTGGAGAAGTTCCTGACCGCGGACCGCATCCTCA	17.8425	16.2068	17.0117
84to89: AACCTGGAGAAGTTCCTGACGGACCGCATCCTCAAA	0	7.17826	8.04234	6.95539	6.54961	6.99319	6.99182		84to89: AACCTGGAGAAGTTCCTGACGGACCGCATCCTCAAA	7.29768	6.66886	6.76416
84to95: TGGAGAAGTTCCTGACCGCATCCTCAAACCCAATGG	0	0	10.0838	0	0	8.69342	10.5654		84to95: TGGAGAAGTTCCTGACCGCATCCTCAAACCCAATGG	10.7238	2.16159	2.99062
84to95CC: ACCTGGAGAAGTTCCTGACCGCATCCTCAAACCCAA	0	0	10.1616	0	0	8.80258	10.6642		84to95CC: ACCTGGAGAAGTTCCTGACCGCATCCTCAAACCCAA	10.7876	2.16159	2.16159
85to88C: CCTGGAGAAGTTCCTGAACGCGGACCGCATCCTCAA	8.91472	8.5726	9.74032	8.35621	8.27111	9.17473	8.75333		85to88C: CCTGGAGAAGTTCCTGAACGCGGACCGCATCCTCAA	9.58641	7.97231	8.41557
85to92: CCTGGAGAAGTTCCTGAAACCGCATCCTCAAACCCA	0	0	3.23844	7.20727	2.80305	4.11011	4.85002		85to92: CCTGGAGAAGTTCCTGAAACCGCATCCTCAAACCCA	4.66212	3.89688	0
85to93: CCTGGAGAAGTTCCTGAACCGCATCCTCAAACCCAA	0	0	9.77721	14.6167	0	13.1718	11.7387		85to93: CCTGGAGAAGTTCCTGAACCGCATCCTCAAACCCAA	14.7092	12.5188	2.99062
85to96ACCA: CCTGGAGAAGTTCCTGAAACCACATCCTCAAACCCA	0	0	11.3002	15.2992	0	11.1364	13.0351		85to96ACCA: CCTGGAGAAGTTCCTGAAACCACATCCTCAAACCCA	13.0554	12.4542	3.89688
86CCATTGGGTGT: GAAGTTCCTGAAGCCATTGGGTGTGAGGCGGACCGC	0	0	3.06747	0	3.3174	2.58637	1.57947		86CCATTGGGTGT: GAAGTTCCTGAAGCCATTGGGTGTGAGGCGGACCGC	3.89688	2.16159	0
86CCATTGGGTTT: AAGTTCCTGAAGCCATTGGGTTTGAGGCGGACCGCA	16.0715	0	13.7619	10.8588	14.4194	15.0854	13.3012		86CCATTGGGTTT: AAGTTCCTGAAGCCATTGGGTTTGAGGCGGACCGCA	15.177	12.4033	3.51377
86to86: CTGGAGAAGTTCCTGAAGAGGCGGACCGCATCCTCA	0	0	12.6111	13.0431	0	12.6839	13.0717		86to86: CTGGAGAAGTTCCTGAAGAGGCGGACCGCATCCTCA	11.4766	11.7009	2.16159
86to91TT: CTGGAGAAGTTCCTGAAGTTGACCGCATCCTCAAAC	0	6.00646	2.05802	3.92639	4.24316	4.47734	3.1626		86to91TT: CTGGAGAAGTTCCTGAAGTTGACCGCATCCTCAAAC	2.16159	0	0
87CCATTGGGTTTG: AAGTTCCTGAAGGCCATTGGGTTTGAGGCGGACCGC	0	0	0	0	0	0	0		87CCATTGGGTTTG: AAGTTCCTGAAGGCCATTGGGTTTGAGGCGGACCGC	5.1595	3.51377	4.4492
87G: TGGAGAAGTTCCTGAAGGGAGGCGGACCGCATCCTC	0	0	0	0	0	0	0		87G: TGGAGAAGTTCCTGAAGGGAGGCGGACCGCATCCTC	0	0	0
87insGAACCGCATGA: TCCTGAAGGGAACCGCATGAAGGCGGACCGCATCCT	0	0	2.05802	1.75161	0	2.58637	0		87insGAACCGCATGA: TCCTGAAGGGAACCGCATGAAGGCGGACCGCATCCT	0	0	0
87to89: TGGAGAAGTTCCTGAAGGCGGACCGCATCCTCAAAC	17.8402	17.0723	16.8464	15.3189	16.9854	17.2342	16.2559		87to89: TGGAGAAGTTCCTGAAGGCGGACCGCATCCTCAAAC	16.4765	14.9649	15.7653
87to91: TGGAGAAGTTCCTGAAGGGACCGCATCCTCAAACCC	0	0	2.38374	3.38811	0	4.47734	3.45194		87to91: TGGAGAAGTTCCTGAAGGGACCGCATCCTCAAACCC	0	0	0
87to92TGG: AGAAGTTCCTGAAGGTGGACCGCATCCTCAAACCCA	0	0	4.98125	0	4.63903	4.47734	4.51568		87to92TGG: AGAAGTTCCTGAAGGTGGACCGCATCCTCAAACCCA	5.63335	4.4492	4.4492
88to92: GGAGAAGTTCCTGAAGGAACCGCATCCTCAAACCCA	0	15.9868	14.3582	15.3041	17.0765	16.2219	14.6871		88to92: GGAGAAGTTCCTGAAGGAACCGCATCCTCAAACCCA	13.0376	12.5248	11.9669
88to93: GGAGAAGTTCCTGAAGGACCGCATCCTCAAACCCAA	14.9798	17.4553	18.4725	17.3391	16.4985	17.6431	17.2785		88to93: GGAGAAGTTCCTGAAGGACCGCATCCTCAAACCCAA	18.0002	16.6114	17.2172
wt: GGTTCAACCTGGAGAAGTTCCTGAAGGAGGCGGACC	19.0673	17.5477	15.0041	16.9239	17.8481	16.8764	16.0323		wt: GGTTCAACCTGGAGAAGTTCCTGAAGGAGGCGGACC	16.1096	14.4811	15.5928

## Sheet: meth2 raw
	nerve	vessel	bone	skin	blood	muscle	hand			limb1	limb2	limb3
54to110: AACGACTGCCGTCCAATGGCTGTCTTGCTCTGCACA	0	0	0	0	0	0	0		54to110: AACGACTGCCGTCCAATGGCTGTCTTGCTCTGCACA	0	0	0
55to110: AACGACTGCCCTCCACATGGCTGTCTTGCTCTGCAC	0	0	0	0	0	0	0		55to110: AACGACTGCCCTCCACATGGCTGTCTTGCTCTGCAC	0	0	0
55to89: AACGACTGCCGTCCACGCGGACCGCATCCTCAAACC	0	0	0	0	0	0	0		55to89: AACGACTGCCGTCCACGCGGACCGCATCCTCAAACC	0	0	0
57to101: ACCTCAACGACTGCCGTCCTCAAACCCAATGGCTGT	0	0	0	11	0	0	0		57to101: ACCTCAACGACTGCCGTCCTCAAACCCAATGGCTGT	0	0	0
66to92: TGCCGTCCACTGGTTCAACCGCATCCTCAAACCCAA	0	0	0	0	0	0	0		66to92: TGCCGTCCACTGGTTCAACCGCATCCTCAAACCCAA	0	0	0
67to105: TGCCGTCCACTGGTTCAAACCCAATGGCTGTCTTGC	18298	33324	3114	11657	40873	55560	4080		67to105: TGCCGTCCACTGGTTCAAACCCAATGGCTGTCTTGC	920	1024	11264
68to109: TGCCGTCCACTGGTTCAACAATGGCTGTCTTGCTCT	0	21	1167	0	22	2672	556		68to109: TGCCGTCCACTGGTTCAACAATGGCTGTCTTGCTCT	0	644	2
71to82: GTCCACTGGTTCAACCTGAAGGAGGCGGACCGCATC	0	0	0	0	0	102	0		71to82: GTCCACTGGTTCAACCTGAAGGAGGCGGACCGCATC	0	0	0
71to84AAG: ACTGGTTCAACCTGAAGGGAGGCGGACCGCATCCTC	4	57	6	3	6	263	2		71to84AAG: ACTGGTTCAACCTGAAGGGAGGCGGACCGCATCCTC	2	0	0
71to85AA: CACTGGTTCAACCTGAAGAGGCGGACCGCATCCTCA	0	0	2	0	0	0	0		71to85AA: CACTGGTTCAACCTGAAGAGGCGGACCGCATCCTCA	0	0	0
71to87AA: CACTGGTTCAACCTGAAGGCGGACCGCATCCTCAAA	5	23	0	0	0	66	0		71to87AA: CACTGGTTCAACCTGAAGGCGGACCGCATCCTCAAA	0	0	0
71to88ACC: CACTGGTTCAACCTGACCGCGGACCGCATCCTCAAA	0	0	0	0	0	0	0		71to88ACC: CACTGGTTCAACCTGACCGCGGACCGCATCCTCAAA	0	0	0
71to88AGAAGTTCCTGAAGAAGGGAAGAATAGGGAGGACAAAACAAACAATCTTACTAAGCCTAAGCCTTACTAA: TTCCTGAAGAAGGGAAGAATAGGGAGGACAAAACAA	0	13	168	2570	4699	1173	70		71to88AGAAGTTCCTGAAGAAGGGAAGAATAGGGAGGACAAAACAAACAATCTTACTAAGCCTAAGCCTTACTAA: TTCCTGAAGAAGGGAAGAATAGGGAGGACAAAACAA	1070	312	1200
71to90AA: CACTGGTTCAACCTGAAGGACCGCATCCTCAAACCC	0	23	0	0	0	39	0		71to90AA: CACTGGTTCAACCTGAAGGACCGCATCCTCAAACCC	0	0	0
73to93: TCCACTGGTTCAACCTGGACCGCATCCTCAAACCCA	0	634	0	0	6162	0	0		73to93: TCCACTGGTTCAACCTGGACCGCATCCTCAAACCCA	1128	2	4
74to85: CACTGGTTCAACCTGGAGGAGGCGGACCGCATCCTC	0	9	1	8	30	8	0		74to85: CACTGGTTCAACCTGGAGGAGGCGGACCGCATCCTC	2	0	2
74to88: CACTGGTTCAACCTGGAGGCGGACCGCATCCTCAAA	0	0	0	0	0	0	0		74to88: CACTGGTTCAACCTGGAGGCGGACCGCATCCTCAAA	0	0	0
74to91: CACTGGTTCAACCTGGAGGACCGCATCCTCAAACCC	0	53	2073	0	0	1704	2308		74to91: CACTGGTTCAACCTGGAGGACCGCATCCTCAAACCC	1224	350	1142
76to88T: CTGGTTCAACCTGGAGAATGCGGACCGCATCCTCAA	3	64	8	23	98	76	0		76to88T: CTGGTTCAACCTGGAGAATGCGGACCGCATCCTCAA	2	0	2
77to88: CTGGAGAAGGCGGACCGCATCCTCAAACCCAATGGC	2736	72811	6715	30362	135827	53900	6684		77to88: CTGGAGAAGGCGGACCGCATCCTCAAACCCAATGGC	2134	1604	10960
77to89A: CTGGTTCAACCTGGAGAAGACGGACCGCATCCTCAA	0	20	8	7	57	38	0		77to89A: CTGGTTCAACCTGGAGAAGACGGACCGCATCCTCAA	8	0	8
78to88: CTGGTTCAACCTGGAGAAGTGCGGACCGCATCCTCA	0	0	0	0	0	0	0		78to88: CTGGTTCAACCTGGAGAAGTGCGGACCGCATCCTCA	0	0	0
78to89: TGGTTCAACCTGGAGAAGTCGGACCGCATCCTCAAA	2649	5546	3265	681	32828	89504	7941		78to89: TGGTTCAACCTGGAGAAGTCGGACCGCATCCTCAAA	15970	3052	11514
78to90: TGGTTCAACCTGGAGAAGTGGACCGCATCCTCAAAC	0	0	0	0	0	5	0		78to90: TGGTTCAACCTGGAGAAGTGGACCGCATCCTCAAAC	2	0	2
79to88GACC: GGTTCAACCTGGAGAAGTTGACCGCGGACCGCATCC	0	0	0	0	0	0	0		79to88GACC: GGTTCAACCTGGAGAAGTTGACCGCGGACCGCATCC	0	0	0
79to89: GGTTCAACCTGGAGAAGTTCGGACCGCATCCTCAAA	0	0	0	0	0	0	0		79to89: GGTTCAACCTGGAGAAGTTCGGACCGCATCCTCAAA	0	0	0
79to91: GGTTCAACCTGGAGAAGTTGACCGCATCCTCAAACC	0	1457	0	0	0	0	0		79to91: GGTTCAACCTGGAGAAGTTGACCGCATCCTCAAACC	0	0	0
81to90: TTCAACCTGGAGAAGTTCCGGACCGCATCCTCAAAC	0	9	0	0	0	1	2		81to90: TTCAACCTGGAGAAGTTCCGGACCGCATCCTCAAAC	0	0	0
81to91: TTCAACCTGGAGAAGTTCCGACCGCATCCTCAAACC	0	0	0	0	21	0	0		81to91: TTCAACCTGGAGAAGTTCCGACCGCATCCTCAAACC	0	0	0
81to94: TTCAACCTGGAGAAGTTCCCGCATCCTCAAACCCAA	0	5338	2405	5605	18547	7246	942		81to94: TTCAACCTGGAGAAGTTCCCGCATCCTCAAACCCAA	752	0	1674
81to95: TTCAACCTGGAGAAGTTCCGCATCCTCAAACCCAAT	0	0	0	0	0	0	0		81to95: TTCAACCTGGAGAAGTTCCGCATCCTCAAACCCAAT	2	0	0
81to96: CAACCTCGAGAAGTTCCCGCATCCTCAAACCCAATG	0	0	0	0	0	0	0		81to96: CAACCTCGAGAAGTTCCCGCATCCTCAAACCCAATG	2	0	0
82to102: TCAACCTGGAGAAGTTCCTCAAACCCAATGGCTGTC	0	0	0	0	0	6	0		82to102: TCAACCTGGAGAAGTTCCTCAAACCCAATGGCTGTC	0	338	718
82to116: TCAACCTGGAGAAGTTCCTGTCTTGCTCTGCACACC	0	0	0	0	0	2174	0		82to116: TCAACCTGGAGAAGTTCCTGTCTTGCTCTGCACACC	0	0	0
82to120: TCAACCTGGAGAAGTTCCTTGCTCTGCACACCCTGT	0	0	0	0	0	0	0		82to120: TCAACCTGGAGAAGTTCCTTGCTCTGCACACCCTGT	0	0	0
82to87TC: TGGAGAAGTTCCTTCGGCGGACCGCATCCTCAAACC	0	0	0	14	8805	0	0		82to87TC: TGGAGAAGTTCCTTCGGCGGACCGCATCCTCAAACC	0	0	0
83to152: CAACCTGGAGAAGTTCCTGTGTTCTATAAGGACCGT	0	0	0	0	0	3	0		83to152: CAACCTGGAGAAGTTCCTGTGTTCTATAAGGACCGT	0	0	0
83to153G: CAACCTGGAGAAGTTCCTGGGTTCTATAAGGACCGT	0	0	0	0	0	330	0		83to153G: CAACCTGGAGAAGTTCCTGGGTTCTATAAGGACCGT	0	0	0
83to88: CAACCTGGAGAAGTTCCTGGCGGACCGCATCCTCAA	0	0	1	2	10	0	1		83to88: CAACCTGGAGAAGTTCCTGGCGGACCGCATCCTCAA	0	0	0
83to90: CAACCTGGAGAAGTTCCTGCGGACCGCATCCTCAAA	0	10293	0	35363	321	67	14720		83to90: CAACCTGGAGAAGTTCCTGCGGACCGCATCCTCAAA	11506	12438	36792
84: AACCTGGAGAAGTTCCTGAGGAGGCGGACCGCATCC	0	4675	948	4095	11659	0	249		84: AACCTGGAGAAGTTCCTGAGGAGGCGGACCGCATCC	0	0	0
84to153: AACCTGGAGAAGTTCCTGAGTTCTATAAGGACCGTT	0	0	0	0	0	14	0		84to153: AACCTGGAGAAGTTCCTGAGTTCTATAAGGACCGTT	0	0	0
84to87: AACCTGGAGAAGTTCCTGAGGCGGACCGCATCCTCA	5	0	2	16	6	103	6		84to87: AACCTGGAGAAGTTCCTGAGGCGGACCGCATCCTCA	8	0	12
84to88CC: ACCTGGAGAAGTTCCTGACCGCGGACCGCATCCTCA	0	0	0	0	0	0	0		84to88CC: ACCTGGAGAAGTTCCTGACCGCGGACCGCATCCTCA	0	0	0
84to89: AACCTGGAGAAGTTCCTGACGGACCGCATCCTCAAA	0	149	12	100	249	0	37		84to89: AACCTGGAGAAGTTCCTGACGGACCGCATCCTCAAA	24	14	20
84to95: TGGAGAAGTTCCTGACCGCATCCTCAAACCCAATGG	0	7155	0	0	16076	2692	377		84to95: TGGAGAAGTTCCTGACCGCATCCTCAAACCCAATGG	1	279	1
84to95CC: ACCTGGAGAAGTTCCTGACCGCATCCTCAAACCCAA	0	6909	0	0	15594	2673	411		84to95CC: ACCTGGAGAAGTTCCTGACCGCATCCTCAAACCCAA	1	287	1
85to88C: CCTGGAGAAGTTCCTGAACGCGGACCGCATCCTCAA	109	287	159	294	181	309	108		85to88C: CCTGGAGAAGTTCCTGAACGCGGACCGCATCCTCAA	130	76	148
85to92: CCTGGAGAAGTTCCTGAAACCGCATCCTCAAACCCA	2	2	0	2	0	2	0		85to92: CCTGGAGAAGTTCCTGAAACCGCATCCTCAAACCCA	2	0	0
85to93: CCTGGAGAAGTTCCTGAACCGCATCCTCAAACCCAA	0	9564	0	0	0	0	12		85to93: CCTGGAGAAGTTCCTGAACCGCATCCTCAAACCCAA	0	0	0
85to96ACCA: CCTGGAGAAGTTCCTGAAACCACATCCTCAAACCCA	0	0	0	0	0	52	3		85to96ACCA: CCTGGAGAAGTTCCTGAAACCACATCCTCAAACCCA	20	12	8
86CCATTGGGTGT: GAAGTTCCTGAAGCCATTGGGTGTGAGGCGGACCGC	0	0	0	0	0	0	0		86CCATTGGGTGT: GAAGTTCCTGAAGCCATTGGGTGTGAGGCGGACCGC	0	0	0
86CCATTGGGTTT: AAGTTCCTGAAGCCATTGGGTTTGAGGCGGACCGCA	0	0	0	0	0	199	0		86CCATTGGGTTT: AAGTTCCTGAAGCCATTGGGTTTGAGGCGGACCGCA	0	0	0
86to86: CTGGAGAAGTTCCTGAAGAGGCGGACCGCATCCTCA	0	0	0	0	0	0	0		86to86: CTGGAGAAGTTCCTGAAGAGGCGGACCGCATCCTCA	0	0	0
86to91TT: CTGGAGAAGTTCCTGAAGTTGACCGCATCCTCAAAC	0	0	0	0	0	0	0		86to91TT: CTGGAGAAGTTCCTGAAGTTGACCGCATCCTCAAAC	0	0	0
87CCATTGGGTTTG: AAGTTCCTGAAGGCCATTGGGTTTGAGGCGGACCGC	0	0	0	0	0	0	0		87CCATTGGGTTTG: AAGTTCCTGAAGGCCATTGGGTTTGAGGCGGACCGC	0	0	0
87G: TGGAGAAGTTCCTGAAGGGAGGCGGACCGCATCCTC	48124	268523	195752	246475	310992	4	81189		87G: TGGAGAAGTTCCTGAAGGGAGGCGGACCGCATCCTC	167486	47414	118962
87insGAACCGCATGA: TCCTGAAGGGAACCGCATGAAGGCGGACCGCATCCT	0	2	4	0	2913	264954	0		87insGAACCGCATGA: TCCTGAAGGGAACCGCATGAAGGCGGACCGCATCCT	0	0	0
87to89: TGGAGAAGTTCCTGAAGGCGGACCGCATCCTCAAAC	220000	498541	296648	562111	396039	538903	202805		87to89: TGGAGAAGTTCCTGAAGGCGGACCGCATCCTCAAAC	296870	103900	244264
87to91: TGGAGAAGTTCCTGAAGGGACCGCATCCTCAAACCC	0	1	1	5	1	10	1		87to91: TGGAGAAGTTCCTGAAGGGACCGCATCCTCAAACCC	0	0	0
87to92TGG: AGAAGTTCCTGAAGGTGGACCGCATCCTCAAACCCA	0	121	68	98	90	135	51		87to92TGG: AGAAGTTCCTGAAGGTGGACCGCATCCTCAAACCCA	150	70	92
88to92: GGAGAAGTTCCTGAAGGAACCGCATCCTCAAACCCA	0	7692	17966	11184	637	25156	7877		88to92: GGAGAAGTTCCTGAAGGAACCGCATCCTCAAACCCA	1294	2984	16330
88to93: GGAGAAGTTCCTGAAGGACCGCATCCTCAAACCCAA	0	188254	16202	135283	350130	121009	42788		88to93: GGAGAAGTTCCTGAAGGACCGCATCCTCAAACCCAA	32618	18786	63472
wt: GGTTCAACCTGGAGAAGTTCCTGAAGGAGGCGGACC	10383	11916	16054	6525	28332	80392	7306		wt: GGTTCAACCTGGAGAAGTTCCTGAAGGAGGCGGACC	42364	9100	12750
	302318	1133486	562749	1052494	1381205	1251544	380526			575692	202686	531344
	3.30778	0.882234	1.77699	0.950124	0.724005	0.799013	2.62794			1.73704	4.93374	1.88202

[truncated: 7 more sheets: meth2 normalized, meth2 log, consolidated log, tissue enriched alleles, enriched allele by change, tissue alleles not in hand, lost and recovered alleles]
