# Supplementary material for: Lineage tracing of genome-edited alleles reveals high fidelity axolotl limb regeneration
Source: eLife journal article supplement (doi:10.7554/elife.25726), 2017-09-16
Supplement: supp [file elife_poa_e25726_Transparent_Reporting_File.docx]

***eLife’s* transparent reporting form**

We encourage authors to provide detailed information *within their submission* to facilitate the interpretation and replication of experiments. If you have any questions, please contact us: [editorial@elifesciences.org](mailto:editorial@elifesciences.org).

**Sample-size estimation**

- You should state whether an appropriate sample size was computed when the study was being designed
- You should state the statistical method of sample size computation and any required assumptions
- If no explicit power analysis was used, you should describe how you decided what sample (replicate) size (number) to use

Please outline where this information can be found within the submission (e.g., page numbers or figure legends), or explain why this information doesn’t apply to your submission:

As this paper describes a lineage tracing method rather than comparisons between experimental groups, we did not conduct power analysis to determine an appropriate sample size.

**Replicates**

- You should report how often each experiment was performed
- You should include a definition of biological versus technical replication
- The data obtained should be provided and sufficient information should be provided to indicate the number of independent biological and/or technical replicates
- If you encountered any outliers, you should describe how these were handled
- Criteria for exclusion/inclusion of data should be clearly stated
- High-throughput sequence data should be uploaded before submission, with a private link for reviewers provided (these are available from both GEO and ArrayExpress)

Please outline where this information can be found within the submission (e.g., page numbers or figure legends), or explain why this information doesn’t apply to your submission:

Number of animals used is stated in Line 72, 77, 95, 113, 142, 424 (Figure 1), 452 (Figure 3C), 460 (Figure 5), Figure 1—Supplements 1 and 3, and Figure 4—Supplement 2, Figure 5-supplement 1. A single outlier is discussed in lines 101-103, and data is provided for both when this outlier is included and excluded. Read counts that were excluded are described in lines 392-394.

**Statistical reporting**

- Statistical analysis methods should be described and justified
- Raw data should be presented in figures whenever informative to do so (typically when N per group is less than 10)
- For each experiment, you should identify the statistical tests used, exact values of N, definitions of center, methods of multiple test correction, and dispersion and precision measures (e.g., mean, median, SD, SEM, confidence intervals; and, for the major substantive results, a measure of effect size (e.g., Pearson's r, Cohen's d)
- Report exact p-values wherever possible alongside the summary statistics and 95% confidence intervals. These should be reported for all key questions and not only when the p-value is less than 0.05.

Statistical methods are described in lines 77-80, 102-104, 116-118, 162-167. Data presented in figures 1b, 4b, 1-supplement 1, and 4-supplement 2 are supported with a table containing all raw, normalized, and logarithmic read scores for all alleles for all animals. The raw data for figure 1-supplements 2 and 3 and figure 4c are provided in additional data files. Raw data for that presented in Figure 5 and supplements are provided in additional data file. Descriptive data is provided in lines 77, 83, 85, 86, 94, 96, 99, 102,119, 135-6, 149, 151-2, 154-6,168-9, 175-6, 180, 210-5, 221-3.

Please outline where this information can be found within the submission (e.g., page numbers or figure legends), or explain why this information doesn’t apply to your submission:

(For large datasets, or papers with a very large number of statistical tests, you may upload a single table file with tests, Ns, etc., with reference to page numbers in the manuscript.)

**Additional data files (“source data”)**

- We encourage you to upload relevant additional data files, such as numerical data that are represented as a graph in a figure, or as a summary table
- Where provided, these should be in the most useful format, and they can be uploaded as “Source data” files linked to a main figure or table
- Include model definition files including the full list of parameters used
- Include code used for data analysis (e.g., R, MatLab)
- Avoid stating that data files are “available upon request”

Please indicate the figures or tables for which source data files have been provided:

Data presented in figures 1b, 4b, 1-supplement 1, and 4-supplement 2 are supported with a table containing all raw, normalized, and logarithmic read scores for all alleles for all animals. The raw data for figure 1-supplements 2 and 3 and figure 4c are provided in additional data files. Raw data for that presented in Figure 5 and supplements are provided in additional data file.
